# Supplementary material
Source: publisher figshare collection journal article supplement (https://gsajournals.figshare.com/ndownloader/files/17818382)
Supplement: Supplementary file 1 [file 17818382]

## Sheet: DE genes in fpr3
List of DE genes in wt vs ∆fpr3
UP - regulated genes													DN - regulated genes
systematic name	standard name	orf type	chr	start	end	strand	wt_S27	fpr3-KAN_S28	pv	FC			systematic name	standard name	orf type	chr	start	end	strand	wt_S27	fpr3-KAN_S28	pv	FC
YAR071W	PHO11	protein_coding	chrI	225460	226863	1	0.71	45.61	4.77396e-15	64.3			YML074C	FPR3	protein_coding	chrXIII	120089	121324	-1	170.83	0.81	1.11022e-16	211
YGR138C	TPO2	protein_coding	chrVII	763762	765606	-1	2.7	64.53	1.11022e-16	23.9			YHL047C	ARN2	protein_coding	chrVIII	8351	10213	-1	53.46	3.76	1.11022e-16	14.2
YPR157W	TDA6	protein_coding	chrXVI	841266	842669	1	2.84	62.71	1.11022e-16	22.1			YBR129C	OPY1	protein_coding	chrII	494353	495339	-1	60.55	11.15	6.34755e-09	5.4
YDR493W	MZM1	protein_coding	chrIV	1436217	1436588	1	2.68	32.27	0.00221715	12.1			YMR156C	TPP1	protein_coding	chrXIII	570300	571016	-1	29.17	5.58	0.000685837	5.2
YCR021C	HSP30	protein_coding	chrIII	156109	157107	-1	21.93	231.34	1.11022e-16	10.5			YOR382W	FIT2	protein_coding	chrXV	1059531	1059992	1	310.43	60.63	1.11022e-16	5.1
YBR093C	PHO5	protein_coding	chrII	429548	430951	-1	19.15	156.06	1.11022e-16	8.1			YDR022C	ATG31	protein_coding	chrIV	488072	488662	-1	25.28	5.08	0.00474007	5
YBR054W	YRO2	protein_coding	chrII	343101	344135	1	17.32	140.16	1.11022e-16	8.1			YBR083W	TEC1	protein_coding	chrII	409169	410629	1	74.31	15.07	3.20854e-14	4.9
YDR281C	PHM6	protein_coding	chrIV	1022007	1022321	-1	12.65	76.23	0.000148982	6			YPL267W	ACM1	protein_coding	chrXVI	38169	38798	1	28.46	6.35	0.00288479	4.5
YHR136C	SPL2	protein_coding	chrVIII	374654	375100	-1	33.42	192.48	1.3437e-12	5.8			YOR308C	SNU66	protein_coding	chrXV	894624	896387	-1	29.36	6.81	6.0022e-07	4.3
YHR215W	PHO12	protein_coding	chrVIII	552099	553502	1	30.5	178.15	1.11022e-16	5.8			YFR039C	OSW7	protein_coding	chrVI	232012	233544	-1	33.13	7.83	9.36013e-07	4.2
YBR152W	SPP381	protein_coding	chrII	546376	547251	1	3.41	19.42	0.00168022	5.7			YIR005W	IST3	protein_coding	chrIX	364889	365335	1	37.88	8.95	0.00463024	4.2
YCL047C	POF1	protein_coding	chrIII	43661	44437	-1	5.13	27.04	0.000643771	5.3			YOR383C	FIT3	protein_coding	chrXV	1060441	1061055	-1	344.95	84.59	1.11022e-16	4.1
YDL107W	MSS2	protein_coding	chrIV	268921	269976	1	3.77	19.9	0.000643771	5.3			YGR040W	KSS1	protein_coding	chrVII	575398	576504	1	71.08	17.17	1.45168e-09	4.1
YFL030W	AGX1	protein_coding	chrVI	76831	77988	1	3.44	18.14	0.000643771	5.3			YPR005C	HAL1	protein_coding	chrXVI	565787	566671	-1	27.01	6.78	0.00103832	4
YMR158W	MRPS8	protein_coding	chrXIII	572248	572715	1	14.9	64.13	0.000146773	4.3			YHL048W	COS8	protein_coding	chrVIII	6401	7546	1	86.91	22.7	4.73722e-11	3.8
YPL060W	MFM1	protein_coding	chrXVI	434523	435764	1	4.81	20.14	0.000611392	4.2			YGR251W	NOP19	protein_coding	chrVII	995639	996229	1	38.76	10.16	0.0016308	3.8
YBR296C	PHO89	protein_coding	chrII	796798	798522	-1	33.49	137.45	1.11022e-16	4.1			YMR035W	IMP2	protein_coding	chrXIII	341142	341675	1	41.03	11.24	0.00255156	3.7
YLR205C	HMX1	protein_coding	chrXII	552724	553677	-1	5.22	18.88	0.00647313	3.6			YDR332W	IRC3	protein_coding	chrIV	1131001	1133070	1	20.69	5.8	3.0365e-05	3.6
YMR028W	TAP42	protein_coding	chrXIII	327482	328582	1	7.24	26.35	0.000524856	3.6			YLL022C	HIF1	protein_coding	chrXII	99044	100201	-1	36.12	10.37	4.63917e-05	3.5
YOL028C	YAP7	protein_coding	chrXV	270633	271370	-1	8.1	28.47	0.00373304	3.5			YGL010W	MPO1	protein_coding	chrVII	475545	476069	1	45.53	13.34	0.00231842	3.4
YHR092C	HXT4	protein_coding	chrVIII	287081	288811	-1	21.29	68.78	4.19986e-11	3.2			YDR319C	YFT2	protein_coding	chrIV	1105003	1105827	-1	39.84	12.13	0.000467401	3.3
YOL155C	HPF1	protein_coding	chrXV	28703	31606	-1	13.72	44.44	6.02585e-12	3.2			YDR480W	DIG2	protein_coding	chrIV	1417399	1418370	1	20.49	6.18	0.00616434	3.3
YNL116W	DMA2	protein_coding	chrXIV	408341	409909	1	7.62	23.59	0.00033177	3.1			YNL129W	NRK1	protein_coding	chrXIV	381480	382202	1	45.46	13.84	0.000467401	3.3
YEL038W	UTR4	protein_coding	chrV	80462	81145	1	24.75	71.67	7.51124e-05	2.9			YGL050W	TYW3	protein_coding	chrVII	405776	406597	1	24.23	7.3	0.00616434	3.3
YGL209W	MIG2	protein_coding	chrVII	95858	97006	1	24.27	68.79	7.17655e-07	2.8			YHL040C	ARN1	protein_coding	chrVIII	19088	20971	-1	71.9	22.3	2.09965e-12	3.2
YDL153C	SAS10	protein_coding	chrIV	181186	183018	-1	11.41	30.57	6.05124e-05	2.7			YER045C	ACA1	protein_coding	chrV	240032	241501	-1	19.65	6.13	0.0012116	3.2
YBL080C	PET112	protein_coding	chrII	73070	74695	-1	6.74	18.46	0.00284978	2.7			YEL065W	SIT1	protein_coding	chrV	27657	29543	1	165.2	50.9	1.11022e-16	3.2
YML123C	PHO84	protein_coding	chrXIII	24037	25800	-1	484.44	1289.15	1.11022e-16	2.7			YPL116W	HOS3	protein_coding	chrXVI	329606	331699	1	42.33	13.86	3.62132e-08	3.1
YPL019C	VTC3	protein_coding	chrXVI	514511	517018	-1	128.27	349.44	1.11022e-16	2.7			YGR101W	PCP1	protein_coding	chrVII	693363	694403	1	56.45	18.26	6.2736e-06	3.1
YOR123C	LEO1	protein_coding	chrXV	553176	554570	-1	11.42	30.84	0.000408515	2.7			YPL268W	PLC1	protein_coding	chrXVI	35236	37845	1	26.71	8.82	1.17246e-06	3
YOR253W	NAT5	protein_coding	chrXV	804377	804907	1	33.76	90.44	0.000204588	2.7			YFR034C	PHO4	protein_coding	chrVI	225020	225958	-1	37.12	12.79	0.000822539	2.9
YLR114C	AVL9	protein_coding	chrXII	374944	377238	-1	7.81	20.49	0.000297599	2.6			YLL002W	RTT109	protein_coding	chrXII	146291	147601	1	22.03	7.63	0.00241751	2.9
YDR057W	YOS9	protein_coding	chrIV	565927	567555	1	8.56	22.11	0.00175323	2.6			YEL064C	AVT2	protein_coding	chrV	29797	31239	-1	21.4	7.63	0.00209365	2.8
YJR048W	CYC1	protein_coding	chrX	526335	526664	1	60.36	154.62	0.000215339	2.6			YBR028C	YPK3	protein_coding	chrII	294425	296002	-1	46.08	16.48	2.48769e-06	2.8
YHR120W	MSH1	protein_coding	chrVIII	349574	352453	1	7.61	19.45	0.000107924	2.6			YHL019C	APM2	protein_coding	chrVIII	67731	69548	-1	17.53	6.6	0.00265469	2.7
YNR027W	BUD17	protein_coding	chrXIV	674923	675876	1	13.57	35.66	0.0020666	2.6			YMR163C	INP2	protein_coding	chrXIII	584271	586388	-1	22.57	8.5	0.000232763	2.7
YPR051W	MAK3	protein_coding	chrXVI	664960	665490	1	20.63	54.64	0.0042093	2.6			YPR141C	KAR3	protein_coding	chrXVI	815734	817923	-1	20.01	7.31	0.00031417	2.7
YPR156C	TPO3	protein_coding	chrXVI	837909	839777	-1	38.9	99.03	2.32625e-12	2.5			YBR103W	SIF2	protein_coding	chrII	447709	449316	1	24.78	9.33	0.000779889	2.7
YOL102C	TPT1	protein_coding	chrXV	125997	126689	-1	17.25	43.31	0.00520892	2.5			YPR083W	MDM36	protein_coding	chrXVI	704854	706593	1	24.61	9.2	0.000459033	2.7
YDL064W	UBC9	protein_coding	chrIV	337487	338070	1	27.29	68.52	0.00125521	2.5			YCR037C	PHO87	protein_coding	chrIII	194414	197185	-1	51.02	19.49	3.74088e-10	2.6
YBR006W	UGA2	protein_coding	chrII	247010	248503	1	12	29.46	0.000894164	2.5			YBR132C	AGP2	protein_coding	chrII	499652	501442	-1	53.39	20.67	3.42682e-07	2.6
YOR107W	RGS2	protein_coding	chrXV	521353	522282	1	20.35	51.64	0.000365825	2.5			YNL173C	MDG1	protein_coding	chrXIV	308957	310057	-1	56.09	21.81	4.43749e-05	2.6
YDR240C	SNU56	protein_coding	chrIV	943674	945152	-1	9.43	22.32	0.00529182	2.4			YDR460W	TFB3	protein_coding	chrIV	1383811	1384776	1	29.9	11.39	0.00456156	2.6
YER130C	COM2	protein_coding	chrV	421115	422446	-1	40.38	96.14	3.40452e-08	2.4			YOR106W	VAM3	protein_coding	chrXV	519121	519972	1	45.59	17.61	0.00113486	2.6
YLR141W	RRN5	protein_coding	chrXII	423683	424774	1	11.86	28.4	0.00632719	2.4			YKL103C	APE1	protein_coding	chrXI	246138	247682	-1	57.37	23.31	2.32491e-06	2.5
YHR192W	LNP1	protein_coding	chrVIII	486826	487662	1	16.66	39.44	0.00529182	2.4			YPL095C	EEB1	protein_coding	chrXVI	368071	369441	-1	30.51	12.41	0.00118419	2.5
YML088W	UFO1	protein_coding	chrXIII	92235	94241	1	15.88	38.88	1.02237e-05	2.4			YOL066C	RIB2	protein_coding	chrXV	202696	204471	-1	19.63	7.89	0.00279821	2.5
YPL081W	RPS9A	protein_coding	chrXVI	404950	406044	1	58.21	139.79	1.21044e-09	2.4			YOR137C	SIA1	protein_coding	chrXV	581813	583681	-1	39.43	16.06	1.71938e-05	2.5
YGR004W	PEX31	protein_coding	chrVII	502938	504326	1	15.06	36.73	0.000375202	2.4			YGR223C	HSV2	protein_coding	chrVII	940869	942215	-1	37.71	14.85	0.000246357	2.5
YLR139C	SLS1	protein_coding	chrXII	421542	423473	-1	7.73	17.61	0.00629704	2.3			YDR528W	HLR1	protein_coding	chrIV	1494586	1495857	1	23.49	9.44	0.00565143	2.5
YER057C	HMF1	protein_coding	chrV	270737	271126	-1	104.71	243.7	3.16468e-06	2.3			YLL028W	TPO1	protein_coding	chrXII	84804	86564	1	82.57	32.38	4.82666e-10	2.5
YER037W	PHM8	protein_coding	chrV	225889	226854	1	20.62	47.64	0.00127819	2.3			YOR073W	SGO1	protein_coding	chrXV	464771	466543	1	30.9	12.41	0.000178957	2.5
YDL048C	STP4	protein_coding	chrIV	366739	368211	-1	95.34	213.95	2.22045e-16	2.2			YIL087C	AIM19	protein_coding	chrIX	199646	200119	-1	79.85	33.77	0.0028634	2.4
YLR097C	HRT3	protein_coding	chrXII	336231	337265	-1	17.32	37.7	0.00510275	2.2			YIR038C	GTT1	protein_coding	chrIX	423809	424513	-1	69.22	28.38	0.000505008	2.4
YJL194W	CDC6	protein_coding	chrX	69338	70879	1	13.56	30.49	0.00150509	2.2			YDL197C	ASF2	protein_coding	chrIV	104917	106494	-1	35.98	15.22	0.000259972	2.4
YMR136W	GAT2	protein_coding	chrXIII	541199	542881	1	28.41	62.42	3.49677e-06	2.2			YGR171C	MSM1	protein_coding	chrVII	840824	842551	-1	25.36	10.42	0.00100342	2.4
YCL009C	ILV6	protein_coding	chrIII	104619	105548	-1	317	659.45	1.11022e-16	2.1			YKL096W	CWP1	protein_coding	chrXI	261132	261851	1	377.64	154.24	2.22045e-16	2.4
YJL012C	VTC4	protein_coding	chrX	411234	413399	-1	201.4	414.32	1.11022e-16	2.1			YDR406W	PDR15	protein_coding	chrIV	1279210	1283799	1	27.12	11.33	4.60791e-08	2.4
YGR187C	HGH1	protein_coding	chrVII	870232	871416	-1	23.53	48.97	0.00112117	2.1			YLR188W	MDL1	protein_coding	chrXII	528300	530387	1	58.19	23.96	4.52037e-08	2.4
YKL027W	TCD2	protein_coding	chrXI	387562	388905	1	14.82	31.26	0.00489688	2.1			YNL278W	CAF120	protein_coding	chrXIV	113271	116453	1	29.73	12.57	2.417e-06	2.4
YLL012W	YEH1	protein_coding	chrXII	125534	127255	1	13.3	27.89	0.00280747	2.1			YNL076W	MKS1	protein_coding	chrXIV	483556	485310	1	33.48	13.68	0.000129502	2.4
YDR481C	PHO8	protein_coding	chrIV	1418550	1420250	-1	94.86	187.62	5.46008e-13	2			YDR181C	SAS4	protein_coding	chrIV	825910	827355	-1	26.86	11.76	0.00341535	2.3
YDR156W	RPA14	protein_coding	chrIV	769525	769938	1	113.07	227.16	6.66919e-05	2			YPL031C	PHO85	protein_coding	chrXVI	492018	493037	-1	48.82	21.58	0.00101656	2.3
YLR250W	SSP120	protein_coding	chrXII	640317	641021	1	40.97	80.89	0.00234649	2			YOR144C	ELG1	protein_coding	chrXV	602717	605092	-1	20.12	8.84	0.00120868	2.3
YER060W	FCY21	protein_coding	chrV	274567	276153	1	15.06	29.63	0.00594817	2			YGR161C	RTS3	protein_coding	chrVII	808629	809420	-1	83	35.37	9.46992e-05	2.3
YER069W	ARG5,6	protein_coding	chrV	295410	298001	1	11.14	22.77	0.0012753	2			YDR351W	SBE2	protein_coding	chrIV	1178666	1181260	1	38.76	16.96	2.42986e-06	2.3
YER072W	VTC1	protein_coding	chrV	302806	303195	1	462.24	908.11	4.80727e-14	2			YJL210W	PEX2	protein_coding	chrX	36919	37734	1	50.04	22.07	0.00286605	2.3
YER150W	SPI1	protein_coding	chrV	468370	468816	1	55.7	114.15	0.00266264	2			YER169W	RPH1	protein_coding	chrV	523369	525759	1	36.24	15.48	7.74276e-06	2.3
YPL181W	CTI6	protein_coding	chrXVI	203421	204941	1	17.68	35.52	0.00250703	2			YBR145W	ADH5	protein_coding	chrII	533762	534817	1	37.73	16.11	0.00241131	2.3
YLR266C	PDR8	protein_coding	chrXII	675619	677724	-1	17.5	33.25	0.00130001	1.9			YMR192W	GYL1	protein_coding	chrXIII	647118	649280	1	25.33	11.1	0.000514204	2.3
YER053C	PIC2	protein_coding	chrV	258737	259639	-1	41.91	79.77	0.00108356	1.9			YAR003W	SWD1	protein_coding	chrI	155005	156285	1	32.66	14.06	0.00202974	2.3
YBL087C	RPL23A	protein_coding	chrII	59822	60739	-1	189.87	364	1.21425e-12	1.9			YGL227W	VID30	protein_coding	chrVII	69671	72547	1	21.46	9.39	0.000220242	2.3
YOL101C	IZH4	protein_coding	chrXV	126982	127920	-1	42.43	82.04	0.00056557	1.9			YMR218C	TRS130	protein_coding	chrXIII	703579	706887	-1	19.56	9.07	0.000350856	2.2
YOR375C	GDH1	protein_coding	chrXV	1041678	1043042	-1	387.45	722.68	1.11022e-16	1.9			YPL202C	AFT2	protein_coding	chrXVI	168088	169338	-1	50.95	23.19	0.00030237	2.2
YLR438W	CAR2	protein_coding	chrXII	1012501	1013775	1	99.21	192.25	6.99978e-10	1.9			YAL014C	SYN8	protein_coding	chrI	128252	129019	-1	76.51	35.17	0.000592295	2.2
YOR359W	VTS1	protein_coding	chrXV	1011189	1012760	1	35.48	66.82	9.88894e-05	1.9			YDR128W	MTC5	protein_coding	chrIV	709549	712995	1	33.52	15.09	8.82281e-07	2.2
YKL214C	YRA2	protein_coding	chrXI	31082	31693	-1	52.08	94.82	0.00570678	1.8			YER020W	GPA2	protein_coding	chrV	195168	196517	1	68.61	31.87	1.97381e-05	2.2
YCL008C	STP22	protein_coding	chrIII	105696	106853	-1	28.38	51.84	0.00474736	1.8			YPR079W	MRL1	protein_coding	chrXVI	698869	700014	1	31.29	13.97	0.00575184	2.2
YMR300C	ADE4	protein_coding	chrXIII	865559	867091	-1	80.56	142.27	2.91785e-07	1.8			YDL234C	GYP7	protein_coding	chrIV	34237	36477	-1	79.11	37.5	7.47839e-09	2.1
YGR286C	BIO2	protein_coding	chrVII	1063813	1064940	-1	38.85	71.84	0.000846431	1.8			YER111C	SWI4	protein_coding	chrV	382595	385876	-1	26.71	12.5	3.80642e-05	2.1
YDR400W	URH1	protein_coding	chrIV	1271063	1272085	1	43.81	80.19	0.000929026	1.8			YKR096W	ESL2	protein_coding	chrXI	626793	630380	1	34.14	16.45	2.3484e-06	2.1
YFR021W	ATG18	protein_coding	chrVI	194812	196314	1	28.49	50.59	0.00227247	1.8			YDR379W	RGA2	protein_coding	chrIV	1230167	1233196	1	19.39	9.25	0.000940849	2.1
YBL068W	PRS4	protein_coding	chrII	92414	93394	1	53.81	96.88	0.000496715	1.8			YCR068W	ATG15	protein_coding	chrIII	237214	238776	1	40.14	19.2	0.00066051	2.1
YNL160W	YGP1	protein_coding	chrXIV	336545	337609	1	40.21	73.27	0.0013315	1.8			YLR134W	PDC5	protein_coding	chrXII	410723	412414	1	23.55	11.23	0.00651119	2.1
YGL180W	ATG1	protein_coding	chrVII	160065	162758	1	12.2	21.91	0.00624851	1.8			YLR381W	CTF3	protein_coding	chrXII	879723	881924	1	23.07	10.9	0.0019158	2.1
YKL116C	PRR1	protein_coding	chrXI	221344	222900	-1	33.26	57.19	0.00165943	1.7			YHR172W	SPC97	protein_coding	chrVIII	448335	450806	1	22.97	10.93	0.00112338	2.1
YDR019C	GCV1	protein_coding	chrIV	484163	485365	-1	39.74	66.53	0.00428665	1.7			YNL103W	MET4	protein_coding	chrXIV	427735	429753	1	44.89	21.31	3.67735e-05	2.1
YDR111C	ALT2	protein_coding	chrIV	678241	679764	-1	26.14	45.3	0.00505558	1.7			YMR070W	MOT3	protein_coding	chrXIII	409154	410626	1	36.51	17.66	0.00183862	2.1
YJR134C	SGM1	protein_coding	chrX	673729	675852	-1	21.57	35.8	0.00608402	1.7			YMR179W	SPT21	protein_coding	chrXIII	619858	622134	1	22.31	10.55	0.0019158	2.1
YLL039C	UBI4	protein_coding	chrXII	64062	65207	-1	49.54	86.43	0.000689938	1.7			YPL254W	HFI1	protein_coding	chrXVI	69485	70951	1	54.99	26.6	0.000136049	2.1
YLR121C	YPS3	protein_coding	chrXII	388744	390270	-1	76.96	132.35	2.13854e-06	1.7			YDL235C	YPD1	protein_coding	chrIV	33415	33918	-1	96.83	49.63	0.00552436	2
YHR039C-A	VMA10	protein_coding	chrVIII	187173	187679	-1	121.8	213.12	0.00037049	1.7			YDL028C	MPS1	protein_coding	chrIV	400997	403291	-1	32.55	16.57	0.000536262	2
YNL241C	ZWF1	protein_coding	chrXIV	196426	197943	-1	139.1	237.26	4.18033e-10	1.7			YML032C	RAD52	protein_coding	chrXIII	212515	213930	-1	52.75	26.85	0.000536262	2
YMR145C	NDE1	protein_coding	chrXIII	554793	556475	-1	227.25	388.77	1.11022e-16	1.7			YPL250C	ICY2	protein_coding	chrXVI	74309	74719	-1	116.32	58.42	0.00489923	2
YIL153W	RRD1	protein_coding	chrIX	55198	56379	1	40.45	67.71	0.00428665	1.7			YPR025C	CCL1	protein_coding	chrXVI	613377	614558	-1	40.45	20.31	0.00489923	2
YDL102W	POL3	protein_coding	chrIV	276872	280165	1	23.89	39.79	0.000290115	1.7			YGL257C	MNT2	protein_coding	chrVII	12481	14157	-1	43.36	22.07	0.00064016	2
YDR138W	HPR1	protein_coding	chrIV	730578	732836	1	29.98	49.6	0.000924567	1.7			YGR084C	MRP13	protein_coding	chrVII	647123	648142	-1	60.54	30.41	0.00138536	2
YHR162W	MPC2	protein_coding	chrVIII	423072	423461	1	188.98	312.97	0.000534246	1.7			YKL121W	DGR2	protein_coding	chrXI	214142	216700	1	19.46	9.77	0.00408394	2
YPL271W	ATP15	protein_coding	chrXVI	30079	30267	1	237.14	402.3	0.00443724	1.7			YDL225W	SHS1	protein_coding	chrIV	52445	54100	1	64.96	33.23	3.64732e-05	2
YPL231W	FAS2	protein_coding	chrXVI	108652	114315	1	516.1	895.72	1.11022e-16	1.7			YDR229W	IVY1	protein_coding	chrIV	924785	926146	1	35.1	17.63	0.00489923	2
YPL111W	CAR1	protein_coding	chrXVI	339944	340945	1	88.47	148.77	8.59435e-05	1.7			YDR237W	MRPL7	protein_coding	chrIV	936615	937493	1	69.12	35.28	0.00186575	2
YPR160W	GPH1	protein_coding	chrXVI	861306	864014	1	21.32	37.3	0.000578968	1.7			YHR071W	PCL5	protein_coding	chrVIII	237004	237693	1	127.02	63.8	0.000139184	2
YDL133C-A	RPL41B	protein_coding	chrIV	221724	221801	-1	1302.43	2039.41	0.000360199	1.6			YFL047W	RGD2	protein_coding	chrVI	40421	42565	1	37.61	18.66	0.000208781	2
YCL031C	RRP7	protein_coding	chrIII	64675	65568	-1	73.53	114.15	0.00496854	1.6			YOR210W	RPB10	protein_coding	chrXV	738320	738532	1	331.99	164.4	0.000503771	2
YJL078C	PRY3	protein_coding	chrX	291336	293981	-1	48.56	77.89	2.12088e-05	1.6			YGL111W	NSA1	protein_coding	chrVII	299978	301369	1	82.28	40.97	1.08443e-05	2
YBR198C	TAF5	protein_coding	chrII	616127	618523	-1	27.84	43.83	0.00339499	1.6			YLR047C	FRE8	protein_coding	chrXII	239347	241407	-1	29.48	15.53	0.00279061	1.9
YNR013C	PHO91	protein_coding	chrXIV	649028	651712	-1	62.32	101.72	4.38317e-07	1.6			YFL044C	OTU1	protein_coding	chrVI	44655	45560	-1	73.65	39.75	0.00239607	1.9
YPR128C	ANT1	protein_coding	chrXVI	791218	792204	-1	66.6	105.42	0.00321562	1.6			YOL007C	CSI2	protein_coding	chrXV	311342	312367	-1	99.02	51.68	9.09295e-05	1.9
YGR233C	PHO81	protein_coding	chrVII	954674	958210	-1	40.27	64.77	6.60215e-06	1.6			YDR244W	PEX5	protein_coding	chrIV	950563	952401	1	34.66	17.95	0.0017475	1.9
YKL173W	SNU114	protein_coding	chrXI	122517	125543	1	21.39	34.37	0.00243073	1.6			YCL051W	LRE1	protein_coding	chrIII	35865	37616	1	43.2	22.84	0.000889845	1.9
YJL117W	PHO86	protein_coding	chrX	192531	193466	1	119.18	185.98	0.000209396	1.6			YJL062W-A	COA3	protein_coding	chrX	316723	316980	1	216.18	116.33	0.00532144	1.9
YLR109W	AHP1	protein_coding	chrXII	368781	369311	1	1888.79	3029.65	1.11022e-16	1.6			YLR353W	BUD8	protein_coding	chrXII	834352	836163	1	30.78	16.56	0.00532144	1.9
YFL031W	HAC1	protein_coding	chrVI	75179	76147	1	839.75	1334.98	1.11022e-16	1.6			YHR102W	KIC1	protein_coding	chrVIII	316572	319814	1	46.37	24.99	4.91933e-06	1.9
YML046W	PRP39	protein_coding	chrXIII	181474	183363	1	27.93	46.05	0.00370098	1.6			YHR216W	IMD2	protein_coding	chrVIII	554396	555967	1	97.57	50.91	1.50711e-06	1.9
YPR080W	TEF1	protein_coding	chrXVI	700594	701970	1	1395.96	2168.03	1.11022e-16	1.6			YER095W	RAD51	protein_coding	chrV	349980	351182	1	59.61	31.6	0.00126874	1.9
YOR291W	YPK9	protein_coding	chrXV	861175	865593	1	19.38	31.24	0.000446326	1.6			YBR073W	RDH54	protein_coding	chrII	383112	385988	1	61.27	33.04	7.72586e-07	1.9
YAL012W	CYS3	protein_coding	chrI	130799	131983	1	683.32	1069.69	1.11022e-16	1.6			YBR163W	EXO5	protein_coding	chrII	565723	567480	1	35.13	18.21	0.0020906	1.9
YDL184C	RPL41A	protein_coding	chrIV	130407	130484	-1	2847.48	4399.47	3.36164e-07	1.5			YNR059W	MNT4	protein_coding	chrXIV	736803	738545	1	31.43	16.65	0.0047964	1.9
YDR101C	ARX1	protein_coding	chrIV	655686	657467	-1	191.15	278.47	7.05232e-08	1.5			YMR199W	CLN1	protein_coding	chrXIII	662644	664284	1	79.51	42.07	1.30827e-05	1.9
YDR447C	RPS17B	protein_coding	chrIV	1354829	1355553	-1	380.53	574.06	9.08532e-08	1.5			YDR069C	DOA4	protein_coding	chrIV	584939	587719	-1	26.86	15.11	0.00243806	1.8
YJR077C	MIR1	protein_coding	chrX	577255	578190	-1	305.39	443.58	9.82648e-07	1.5			YDR277C	MTH1	protein_coding	chrIV	1014401	1015702	-1	48.96	27.66	0.00541014	1.8
YER055C	HIS1	protein_coding	chrV	264892	265785	-1	367.64	567.38	6.07356e-10	1.5			YJL020C	BBC1	protein_coding	chrX	398937	402410	-1	71.96	39.17	6.24484e-09	1.8
YOL064C	MET22	protein_coding	chrXV	206103	207176	-1	66.77	101.54	0.00538741	1.5			YLR071C	RGR1	protein_coding	chrXII	275378	278626	-1	51.5	28.95	5.57422e-06	1.8
YGR253C	PUP2	protein_coding	chrVII	998358	999140	-1	179.35	261.93	0.000490941	1.5			YHR199C	AIM46	protein_coding	chrVIII	497490	498422	-1	84.33	46.11	0.00119868	1.8
YGR295C	COS6	protein_coding	chrVII	1081584	1082729	-1	92.99	137.06	0.00182927	1.5			YML128C	MSC1	protein_coding	chrXIII	15135	16676	-1	40.69	22.06	0.00342627	1.8
YKL085W	MDH1	protein_coding	chrXI	279123	280127	1	98.11	144.35	0.00285748	1.5			YML110C	COQ5	protein_coding	chrXIII	50031	50954	-1	169.23	96.36	1.65878e-05	1.8
YDL014W	NOP1	protein_coding	chrIV	427364	428347	1	243.93	355.86	5.56041e-06	1.5			YMR302C	YME2	protein_coding	chrXIII	870073	872625	-1	35.11	19.59	0.000782545	1.8
YDR064W	RPS13	protein_coding	chrIV	579458	580452	1	888.87	1319.2	1.11022e-16	1.5			YPL011C	TAF3	protein_coding	chrXVI	533642	534703	-1	56.27	31.09	0.00540009	1.8
YJL159W	HSP150	protein_coding	chrX	120449	121690	1	1889.31	2780.68	1.11022e-16	1.5			YOL158C	ENB1	protein_coding	chrXV	19491	21311	-1	129.08	70.87	2.60928e-08	1.8
YER023W	PRO3	protein_coding	chrV	201076	201936	1	160.79	233.56	0.000656846	1.5			YGL023C	PIB2	protein_coding	chrVII	450197	452104	-1	30.8	16.78	0.0049075	1.8
YBR097W	VPS15	protein_coding	chrII	436951	441315	1	17.34	26.13	0.00526605	1.5			YKR093W	PTR2	protein_coding	chrXI	615730	617535	1	433.47	240.98	1.11022e-16	1.8
YPL085W	SEC16	protein_coding	chrXVI	387067	393654	1	34.17	50.72	3.81528e-06	1.5			YIL118W	RHO3	protein_coding	chrIX	139752	140447	1	108.76	60.37	0.0018705	1.8
YOR092W	ECM3	protein_coding	chrXV	495127	496968	1	51.91	77.13	0.00253493	1.5			YDR096W	GIS1	protein_coding	chrIV	637139	639823	1	81.61	44.34	4.97595e-08	1.8
YDL081C	RPP1A	protein_coding	chrIV	309802	310122	-1	1818.2	2543.23	4.58724e-10	1.4			YJR138W	IML1	protein_coding	chrX	684567	689321	1	21.36	12.2	0.000550198	1.8
YDR144C	MKC7	protein_coding	chrIV	744311	746101	-1	100.65	145.24	0.000137508	1.4			YJR148W	BAT2	protein_coding	chrX	705744	706874	1	208.71	114.11	2.01802e-08	1.8
YDR502C	SAM2	protein_coding	chrIV	1453310	1454464	-1	160.39	220.88	0.000849741	1.4			YLR019W	PSR2	protein_coding	chrXII	180288	181481	1	115.11	64.52	3.57753e-05	1.8
YCR084C	TUP1	protein_coding	chrIII	260311	262452	-1	178.09	247.55	7.91146e-07	1.4			YHR119W	SET1	protein_coding	chrVIII	346043	349285	1	25.18	14.19	0.00157163	1.8
YJR145C	RPS4A	protein_coding	chrX	702027	703068	-1	1256.92	1748.41	1.11022e-16	1.4			YHR206W	SKN7	protein_coding	chrVIII	512732	514600	1	125.76	71.19	1.00135e-07	1.8
YLR044C	PDC1	protein_coding	chrXII	232390	234081	-1	7667.62	11011	1.11022e-16	1.4			YER040W	GLN3	protein_coding	chrV	229795	231987	1	28.16	15.51	0.00451341	1.8
YLR058C	SHM2	protein_coding	chrXII	257992	259401	-1	894.26	1229.65	1.11022e-16	1.4			YNL075W	IMP4	protein_coding	chrXIV	485607	486479	1	75.3	42.4	0.00452907	1.8
YBL030C	PET9	protein_coding	chrII	163041	163997	-1	358.01	497.62	2.89131e-06	1.4			YNL073W	MSK1	protein_coding	chrXIV	488386	490116	1	73.07	41.04	7.69057e-05	1.8
YNL322C	KRE1	protein_coding	chrXIV	33294	34235	-1	170.23	236.84	0.00132283	1.4			YPR164W	MMS1	protein_coding	chrXVI	870703	874926	1	41.73	23.69	4.31295e-06	1.8
YNR016C	ACC1	protein_coding	chrXIV	654673	661374	-1	447.31	642.64	1.11022e-16	1.4			YDR303C	RSC3	protein_coding	chrIV	1068729	1071386	-1	74.57	45.17	1.13773e-05	1.7
YNR067C	DSE4	protein_coding	chrXIV	755746	759099	-1	125.91	181.96	4.57375e-09	1.4			YCR030C	SYP1	protein_coding	chrIII	173826	176438	-1	63.65	37.14	1.88756e-05	1.7
YML086C	ALO1	protein_coding	chrXIII	95791	97371	-1	66.15	94.92	0.00428293	1.4			YLL019C	KNS1	protein_coding	chrXII	105686	107899	-1	38.69	22.14	0.00156214	1.7
YMR296C	LCB1	protein_coding	chrXIII	859215	860891	-1	129.47	175.39	0.000642838	1.4			YHR082C	KSP1	protein_coding	chrVIII	268459	271548	-1	116.04	68.32	5.9951e-10	1.7
YOL120C	RPL18A	protein_coding	chrXV	93395	94402	-1	1008.82	1454.05	1.11022e-16	1.4			YHR115C	DMA1	protein_coding	chrVIII	340109	341359	-1	73.25	42.39	0.00129848	1.7
YOR340C	RPA43	protein_coding	chrXV	959202	960182	-1	110.66	159.1	0.00342831	1.4			YBL105C	PKC1	protein_coding	chrII	14241	17696	-1	55.33	33	9.60337e-06	1.7
YGL147C	RPL9A	protein_coding	chrVII	227754	228329	-1	1938.35	2669.64	2.22045e-16	1.4			YMR016C	SOK2	protein_coding	chrXIII	303236	305593	-1	58.71	34.37	0.000103363	1.7
YGR209C	TRX2	protein_coding	chrVII	912913	913227	-1	328.83	470.06	0.00495391	1.4			YMR031C	EIS1	protein_coding	chrXIII	332212	334743	-1	44.45	25.68	0.00035307	1.7
YKL182W	FAS1	protein_coding	chrXI	100671	106826	1	1173.79	1609.74	1.11022e-16	1.4			YMR162C	DNF3	protein_coding	chrXIII	578951	583921	-1	27.65	16.1	9.5937e-05	1.7
YKL006W	RPL14A	protein_coding	chrXI	431906	432720	1	306.74	424.74	7.92286e-05	1.4			YPL127C	HHO1	protein_coding	chrXVI	308828	309604	-1	132.03	79.83	0.00153788	1.7
YDL022W	GPD1	protein_coding	chrIV	411825	413000	1	260	372.62	1.1428e-06	1.4			YGL190C	CDC55	protein_coding	chrVII	145809	147389	-1	94.5	56.95	0.000121248	1.7
YDR055W	PST1	protein_coding	chrIV	563527	564861	1	137.27	197.1	0.00015212	1.4			YGL129C	RSM23	protein_coding	chrVII	267723	269075	-1	75.08	43.63	0.000764969	1.7
YJR121W	ATP2	protein_coding	chrX	647607	649142	1	879.91	1228.43	1.11022e-16	1.4			YGR005C	TFG2	protein_coding	chrVII	504657	505859	-1	59.61	34.93	0.00527508	1.7
YLR061W	RPL22A	protein_coding	chrXII	263194	263948	1	592.31	805.67	6.75194e-07	1.4			YGR257C	MTM1	protein_coding	chrVII	1006205	1007305	-1	59.7	34.53	0.00639885	1.7
YLR340W	RPP0	protein_coding	chrXII	805887	806825	1	4268.18	6047.53	1.11022e-16	1.4			YKL112W	ABF1	protein_coding	chrXI	226570	228765	1	60.77	35.08	9.73997e-05	1.7
YHR025W	THR1	protein_coding	chrVIII	159438	160511	1	411.75	557.99	1.07897e-06	1.4			YKL043W	PHD1	protein_coding	chrXI	356748	357848	1	76.89	45.43	0.00278561	1.7
YHR137W	ARO9	protein_coding	chrVIII	375709	377250	1	76.86	109.65	0.00281559	1.4			YDL240W	LRG1	protein_coding	chrIV	22823	25876	1	40.44	23.59	0.000225947	1.7
YER117W	RPL23B	protein_coding	chrV	396769	397653	1	294.85	422.79	6.7341e-06	1.4			YDR189W	SLY1	protein_coding	chrIV	838392	840392	1	92.08	54.5	1.0819e-05	1.7
YBR118W	TEF2	protein_coding	chrII	477671	479047	1	2031.74	2816.12	1.11022e-16	1.4			YDR213W	UPC2	protein_coding	chrIV	889751	892492	1	31.96	19.34	0.00344495	1.7
YMR072W	ABF2	protein_coding	chrXIII	411569	412120	1	238.17	333.49	0.00299785	1.4			YDR216W	ADR1	protein_coding	chrIV	895035	899006	1	27.58	16.12	0.000535093	1.7
YPL079W	RPL21B	protein_coding	chrXVI	406636	407539	1	548.67	769.16	7.18259e-09	1.4			YDR227W	SIR4	protein_coding	chrIV	917571	921647	1	21.5	12.76	0.00252568	1.7
YPL048W	CAM1	protein_coding	chrXVI	464401	465648	1	208.29	282.98	0.000161881	1.4			YJL092W	SRS2	protein_coding	chrX	257423	260947	1	34.47	20.43	0.00036588	1.7
YPR041W	TIF5	protein_coding	chrXVI	648704	649921	1	201.98	285.85	2.67713e-05	1.4			YJR068W	RFC2	protein_coding	chrX	567643	568704	1	78.78	47.1	0.00355391	1.7
YPR132W	RPS23B	protein_coding	chrXVI	794965	795767	1	246.82	356.33	6.23743e-05	1.4			YBL016W	FUS3	protein_coding	chrII	192451	193512	1	64.71	37.68	0.00581256	1.7
YGL103W	RPL28	protein_coding	chrVII	310967	311927	1	602.15	856.8	5.8006e-11	1.4			YBR267W	REI1	protein_coding	chrII	739841	741022	1	69.09	40.63	0.00307054	1.7
YGL055W	OLE1	protein_coding	chrVII	398628	400160	1	999.23	1442.29	1.11022e-16	1.4			YNL126W	SPC98	protein_coding	chrXIV	387227	389767	1	31.36	18.11	0.00262936	1.7
YGR118W	RPS23A	protein_coding	chrVII	726974	727730	1	422.34	578.87	1.61176e-05	1.4			YML117W	NAB6	protein_coding	chrXIII	34243	37647	1	79.85	47.31	9.45346e-08	1.7
YDR046C	BAP3	protein_coding	chrIV	548762	550576	-1	94.93	126.78	0.00388608	1.3			YMR004W	MVP1	protein_coding	chrXIII	274017	275552	1	48.63	28.01	0.0034377	1.7
YDR155C	CPR1	protein_coding	chrIV	768512	769000	-1	3071.44	3860.68	3.09192e-11	1.3			YMR191W	SPG5	protein_coding	chrXIII	645656	646777	1	86.11	50.83	0.00137451	1.7
YDR345C	HXT3	protein_coding	chrIV	1162957	1164660	-1	839.33	1104.97	3.33067e-15	1.3			YOR188W	MSB1	protein_coding	chrXV	685767	689180	1	34.13	20.51	0.000647099	1.7
YCR011C	ADP1	protein_coding	chrIII	133724	136873	-1	60.39	79.08	0.00487896	1.3			YGL071W	AFT1	protein_coding	chrVII	372012	374084	1	54.29	32.34	0.000665755	1.7
YCR077C	PAT1	protein_coding	chrIII	250238	252628	-1	127.47	163.19	0.00116835	1.3			YGL043W	DST1	protein_coding	chrVII	417483	418412	1	92.1	54.86	0.00299597	1.7
YLR106C	MDN1	protein_coding	chrXII	349006	363738	-1	88.22	117.82	2.22045e-15	1.3			YGR056W	RSC1	protein_coding	chrVII	601661	604447	1	34.66	20.1	0.000996323	1.7
YLR325C	RPL38	protein_coding	chrXII	781143	781379	-1	1941.53	2528.6	1.84128e-05	1.3			YKR031C	SPO14	protein_coding	chrXI	501344	506395	-1	30.75	19.01	0.000177394	1.6
YHR094C	HXT1	protein_coding	chrVIII	290913	292625	-1	184.89	233.62	0.00178698	1.3			YDL215C	GDH2	protein_coding	chrIV	70640	73918	-1	48.9	31.43	0.000403156	1.6
YFR051C	RET2	protein_coding	chrVI	250163	251803	-1	169.33	217.65	0.00161783	1.3			YDR309C	GIC2	protein_coding	chrIV	1079048	1080199	-1	142.65	86.85	7.43555e-05	1.6
YBL045C	COR1	protein_coding	chrII	134143	135516	-1	139.9	182.76	0.00506861	1.3			YDR372C	VPS74	protein_coding	chrIV	1221112	1222149	-1	164.08	102.17	0.000107299	1.6
YBR181C	RPS6B	protein_coding	chrII	591712	592774	-1	607.14	815.05	1.2297e-08	1.3			YDR384C	ATO3	protein_coding	chrIV	1241204	1242031	-1	127.5	78.54	0.0018689	1.6
YML035C	AMD1	protein_coding	chrXIII	206428	208860	-1	65.09	87.18	0.00514845	1.3			YJL165C	HAL5	protein_coding	chrX	106894	109461	-1	82.61	51.04	1.15672e-05	1.6
YKL216W	URA1	protein_coding	chrXI	25215	26159	1	528.03	687.09	8.7962e-06	1.3			YJL029C	VPS53	protein_coding	chrX	388385	390853	-1	50.42	31.2	0.000808098	1.6
YKR057W	RPS21A	protein_coding	chrXI	551657	552242	1	270.24	363.65	0.00442944	1.3			YLR247C	IRC20	protein_coding	chrXII	628684	633354	-1	30.49	19.28	0.000576129	1.6
YDR127W	ARO1	protein_coding	chrIV	704484	709250	1	134.34	169.37	1.09864e-05	1.3			YBL091C	MAP2	protein_coding	chrII	47363	48628	-1	125.87	80.61	0.000382646	1.6
YCR053W	THR4	protein_coding	chrIII	216697	218241	1	362.94	464.29	1.13792e-05	1.3			YBL051C	PIN4	protein_coding	chrII	122753	124759	-1	112.65	68.29	2.8549e-06	1.6
YJL052W	TDH1	protein_coding	chrX	338271	339269	1	291.12	373.55	0.00136408	1.3			YBR004C	GPI18	protein_coding	chrII	244366	245667	-1	123.92	79.15	0.00032725	1.6
YHR010W	RPL27A	protein_coding	chrVIII	126521	127492	1	525.66	698.88	1.00649e-06	1.3			YBR260C	RGD1	protein_coding	chrII	732639	734639	-1	46.29	28.5	0.00354615	1.6
YHR190W	ERG9	protein_coding	chrVIII	484845	486179	1	214.12	269.04	0.00381828	1.3			YNL183C	NPR1	protein_coding	chrXIV	293137	295509	-1	40.29	24.87	0.00319782	1.6
YEL026W	SNU13	protein_coding	chrV	101943	102323	1	860.04	1108.12	0.000542997	1.3			YML038C	YMD8	protein_coding	chrXIII	202775	204103	-1	128.15	79.8	0.000107299	1.6
YNL162W	RPL42A	protein_coding	chrXIV	331322	332154	1	616.96	791.48	2.10969e-05	1.3			YMR076C	PDS5	protein_coding	chrXIII	416196	420029	-1	27.28	17.48	0.00407938	1.6
YNL112W	DBP2	protein_coding	chrXIV	413639	416281	1	137.92	183.97	2.90545e-05	1.3			YPL115C	BEM3	protein_coding	chrXVI	332100	335486	-1	46.17	28.06	0.000106447	1.6
YGL195W	GCN1	protein_coding	chrVII	131525	139543	1	259.58	333.11	1.11022e-16	1.3			YOL060C	MAM3	protein_coding	chrXV	214017	216137	-1	57.76	36.79	0.00165215	1.6
YGL030W	RPL30	protein_coding	chrVII	439091	439638	1	627.03	825.2	0.000114638	1.3			YGR146C	ECL1	protein_coding	chrVII	784223	784858	-1	216.11	138.43	0.000978245	1.6
YGR034W	RPL26B	protein_coding	chrVII	555812	556672	1	458.08	589.12	0.000166498	1.3			YDR208W	MSS4	protein_coding	chrIV	868224	870563	1	83	50.45	1.57016e-05	1.6
YGR234W	YHB1	protein_coding	chrVII	959904	961103	1	731.21	980.45	3.77536e-11	1.3			YDR452W	PPN1	protein_coding	chrIV	1362878	1364902	1	76.73	48.42	0.000308056	1.6
													YCL028W	RNQ1	protein_coding	chrIII	70150	71367	1	140.65	87.89	0.000113722	1.6
													YJL198W	PHO90	protein_coding	chrX	60844	63489	1	95.98	58.23	7.20886e-07	1.6
													YJL145W	SFH5	protein_coding	chrX	145160	146044	1	105.79	66.7	0.00502113	1.6
													YLL035W	GRC3	protein_coding	chrXII	68580	70478	1	50.87	31.61	0.00340223	1.6
													YLR357W	RSC2	protein_coding	chrXII	841331	844000	1	57.82	35.6	0.000166905	1.6
													YLR371W	ROM2	protein_coding	chrXII	862714	866784	1	49.42	29.98	1.03277e-05	1.6
													YHR070W	TRM5	protein_coding	chrVIII	234881	236380	1	63.74	39.35	0.00319782	1.6
													YHR084W	STE12	protein_coding	chrVIII	274174	276240	1	57.82	35.33	0.000789008	1.6
													YFR052W	RPN12	protein_coding	chrVI	252505	253329	1	231.79	144.31	4.03374e-05	1.6
													YER068W	MOT2	protein_coding	chrV	293050	294813	1	80.18	51.04	0.000713307	1.6
													YBR005W	RCR1	protein_coding	chrII	245906	246547	1	212.54	135.58	0.000927301	1.6
													YBR200W	BEM1	protein_coding	chrII	620872	622527	1	55.93	34.44	0.00354615	1.6
													YNL212W	VID27	protein_coding	chrXIV	247461	249809	1	48.76	31.09	0.00239307	1.6
													YNL044W	YIP3	protein_coding	chrXIV	545268	545877	1	150.21	91.85	0.00332517	1.6
													YNR044W	AGA1	protein_coding	chrXIV	703699	705876	1	70.42	42.72	0.000117427	1.6
													YMR058W	FET3	protein_coding	chrXIII	388822	390732	1	859.43	546.04	1.11022e-16	1.6
													YMR215W	GAS3	protein_coding	chrXIII	696796	698370	1	325.04	207.08	1.27299e-10	1.6
													YPR036W-A	SPO24	protein_coding	chrXVI	645950	646153	1	981.33	632.65	8.56389e-05	1.6
													YOR113W	AZF1	protein_coding	chrXV	534075	536819	1	38.82	23.69	0.00148573	1.6
													YOR220W	RCN2	protein_coding	chrXV	755328	756125	1	159.76	102.8	0.00165484	1.6
													YOR303W	CPA1	protein_coding	chrXV	882899	884134	1	135.38	86.61	0.000266148	1.6
													YAL051W	OAF1	protein_coding	chrI	48564	51707	1	40.23	24.82	0.000686593	1.6
													YKL020C	SPT23	protein_coding	chrXI	398832	402080	-1	62.23	40.34	9.46353e-05	1.5
													YDR001C	NTH1	protein_coding	chrIV	450220	452475	-1	45.47	29.71	0.00622829	1.5
													YDR006C	SOK1	protein_coding	chrIV	458542	461247	-1	72.51	48.43	0.000308051	1.5
													YDR310C	SUM1	protein_coding	chrIV	1081128	1084316	-1	43.72	29.18	0.00229677	1.5
													YJL157C	FAR1	protein_coding	chrX	123836	126328	-1	88.29	58.99	0.000133676	1.5
													YLR034C	SMF3	protein_coding	chrXII	210512	211933	-1	133.78	87.95	0.000235199	1.5
													YLR094C	GIS3	protein_coding	chrXII	327730	329238	-1	74.58	48.4	0.00365755	1.5
													YHL035C	VMR1	protein_coding	chrVIII	27978	32756	-1	28.76	18.84	0.00163692	1.5
													YHR030C	SLT2	protein_coding	chrVIII	168890	170344	-1	119.11	77.7	0.000360366	1.5
													YER122C	GLO3	protein_coding	chrV	402871	404352	-1	106.18	70.21	0.000952294	1.5
													YBR276C	PPS1	protein_coding	chrII	757620	760043	-1	48.89	32.61	0.00487964	1.5
													YNL201C	PSY2	protein_coding	chrXIV	260627	263203	-1	49.86	34.16	0.0058898	1.5
													YML115C	VAN1	protein_coding	chrXIII	40187	41794	-1	94.15	60.97	0.000713413	1.5
													YPL246C	RBD2	protein_coding	chrXVI	84509	85297	-1	167.89	115.39	0.00549761	1.5
													YPL128C	TBF1	protein_coding	chrXVI	306533	308221	-1	77.84	50.94	0.00202493	1.5
													YPL057C	SUR1	protein_coding	chrXVI	451909	453057	-1	314.66	212.46	1.74295e-06	1.5
													YOL087C	DUF1	protein_coding	chrXV	155287	158637	-1	33.29	21.79	0.00450213	1.5
													YOR047C	STD1	protein_coding	chrXV	416347	417681	-1	84.3	54.71	0.00365755	1.5
													YOR322C	LDB19	protein_coding	chrXV	918606	921062	-1	57.16	37.05	0.00114236	1.5
													YOR360C	PDE2	protein_coding	chrXV	1013241	1014821	-1	124.73	82.9	0.000254153	1.5
													YGL201C	MCM6	protein_coding	chrVII	117854	120907	-1	39.13	25.88	0.00399407	1.5
													YKR008W	RSC4	protein_coding	chrXI	452201	454078	1	63.64	42.09	0.00399407	1.5
													YIL140W	AXL2	protein_coding	chrIX	85366	87837	1	58.82	40.07	0.00296307	1.5
													YCR033W	SNT1	protein_coding	chrIII	186489	190169	1	45.73	30.44	0.000759257	1.5
													YCR069W	CPR4	protein_coding	chrIII	239055	240011	1	138.42	89.91	0.00164942	1.5
													YCR081W	SRB8	protein_coding	chrIII	254371	258654	1	33.25	22.42	0.00261677	1.5
													YJR002W	MPP10	protein_coding	chrX	438865	440646	1	72.66	48.28	0.00302859	1.5
													YJR075W	HOC1	protein_coding	chrX	573981	575171	1	161.4	110.04	0.000653022	1.5
													YLR206W	ENT2	protein_coding	chrXII	554578	556419	1	81.65	52.68	0.000678101	1.5
													YHR049W	FSH1	protein_coding	chrVIII	206462	207193	1	221.78	150.34	0.00149911	1.5
													YBL005W	PDR3	protein_coding	chrII	217470	220400	1	37.38	24.24	0.00407169	1.5
													YBR212W	NGR1	protein_coding	chrII	647886	649904	1	82.38	55	0.000881975	1.5
													YNL145W	MFA2	protein_coding	chrXIV	352414	352530	1	1694.01	1128.73	0.000265612	1.5
													YNL094W	APP1	protein_coding	chrXIV	447611	449374	1	64.93	43.67	0.00662865	1.5
													YMR316W	DIA1	protein_coding	chrXIII	904825	905835	1	118.22	79.17	0.0051033	1.5
													YOR191W	ULS1	protein_coding	chrXV	692475	697334	1	28.9	19.76	0.00382367	1.5
													YOR208W	PTP2	protein_coding	chrXV	733925	736177	1	56.58	38.19	0.0044828	1.5
													YOR374W	ALD4	protein_coding	chrXV	1039840	1041399	1	88.74	58.36	0.00171724	1.5
													YGL233W	SEC15	protein_coding	chrVII	59122	61854	1	50.66	34.78	0.00442985	1.5
													YGL215W	CLG1	protein_coding	chrVII	87981	89339	1	185.42	120	1.22674e-05	1.5
													YGL151W	NUT1	protein_coding	chrVII	217524	220922	1	41.02	27.37	0.00229677	1.5
													YKL203C	TOR2	protein_coding	chrXI	55935	63359	-1	29.91	21.42	0.00121698	1.4
													YKL165C	MCD4	protein_coding	chrXI	137932	140691	-1	76.5	55.46	0.00229399	1.4
													YDL039C	PRM7	protein_coding	chrIV	381985	384081	-1	240.8	173.18	1.42039e-06	1.4
													YDL037C	BSC1	protein_coding	chrIV	384601	385587	-1	295.67	213.88	0.000309927	1.4
													YJL212C	OPT1	protein_coding	chrX	33850	36249	-1	105.41	75.87	0.000659865	1.4
													YLL051C	FRE6	protein_coding	chrXII	37333	39471	-1	88	63.61	0.00369355	1.4
													YLR028C	ADE16	protein_coding	chrXII	199540	201315	-1	113.28	81.68	0.00251082	1.4
													YLR172C	DPH5	protein_coding	chrXII	501260	502162	-1	212.87	157.33	0.00598	1.4
													YLR286C	CTS1	protein_coding	chrXII	708448	710136	-1	1654.07	1216.08	1.11022e-16	1.4
													YLR310C	CDC25	protein_coding	chrXII	752224	756993	-1	56.58	39.43	0.000127586	1.4
													YBL067C	UBP13	protein_coding	chrII	93639	95882	-1	78.56	54.39	0.00165475	1.4
													YBL007C	SLA1	protein_coding	chrII	212632	216366	-1	177.86	131.52	3.35783e-07	1.4
													YBR036C	CSG2	protein_coding	chrII	309081	310313	-1	247.18	173.64	6.64859e-05	1.4
													YBR245C	ISW1	protein_coding	chrII	708150	711539	-1	71.1	52.53	0.00206419	1.4
													YMR047C	NUP116	protein_coding	chrXIII	363364	366705	-1	56.92	40.71	0.00265725	1.4
													YMR212C	EFR3	protein_coding	chrXIII	690695	693043	-1	102.61	75.39	0.00172707	1.4
													YMR216C	SKY1	protein_coding	chrXIII	698811	701039	-1	78.64	54.76	0.00197831	1.4
													YMR305C	SCW10	protein_coding	chrXIII	879063	880232	-1	946.6	676.38	3.5949e-13	1.4
													YPL032C	SVL3	protein_coding	chrXVI	488887	491364	-1	169.21	119.91	4.79688e-06	1.4
													YPR042C	PUF2	protein_coding	chrXVI	650435	653662	-1	61.4	44.94	0.00405872	1.4
													YOR098C	NUP1	protein_coding	chrXV	507948	511178	-1	86.93	60.38	8.16053e-05	1.4
													YGL094C	PAN2	protein_coding	chrVII	331118	334465	-1	55.63	38.85	0.00154739	1.4
													YGL028C	SCW11	protein_coding	chrVII	441281	442909	-1	300.2	219.87	6.63864e-06	1.4
													YGR279C	SCW4	protein_coding	chrVII	1048798	1049958	-1	1301.38	945.31	5.55111e-16	1.4
													YIL076W	SEC28	protein_coding	chrIX	216658	217548	1	223.56	159.45	0.00194296	1.4
													YDR074W	TPS2	protein_coding	chrIV	593893	596583	1	158.78	113.02	5.06275e-06	1.4
													YJR092W	BUD4	protein_coding	chrX	598735	603078	1	33.25	23.49	0.006845	1.4
													YHR103W	SBE22	protein_coding	chrVIII	320414	322972	1	74.73	52.78	0.0018357	1.4
													YFR019W	FAB1	protein_coding	chrVI	184502	191338	1	25.49	18.29	0.00435017	1.4
													YBR149W	ARA1	protein_coding	chrII	539987	541021	1	177.06	130.5	0.00679218	1.4
													YNL192W	CHS1	protein_coding	chrXIV	276502	279897	1	119.66	84.26	4.69589e-06	1.4
													YNL085W	MKT1	protein_coding	chrXIV	467131	469623	1	320.81	232.36	2.68499e-09	1.4
													YNL066W	SUN4	protein_coding	chrXIV	501515	502777	1	693.16	496.67	1.40927e-10	1.4
													YMR011W	HXT2	protein_coding	chrXIII	288079	289704	1	971.48	715.58	1.66534e-15	1.4
													YPL061W	ALD6	protein_coding	chrXVI	432588	434090	1	1119.9	802.77	1.11022e-16	1.4
													YPR129W	SCD6	protein_coding	chrXVI	792687	793736	1	130.9	91.47	0.00663026	1.4
													YPR159W	KRE6	protein_coding	chrXVI	857583	859745	1	290.55	201.67	3.54409e-09	1.4
													YDL040C	NAT1	protein_coding	chrIV	378874	381438	-1	135.13	105.7	0.00234348	1.3
													YJR091C	JSN1	protein_coding	chrX	595061	598336	-1	107.32	83.07	0.00143314	1.3
													YLR084C	RAX2	protein_coding	chrXII	296589	300251	-1	72.05	55.44	0.00478818	1.3
													YEL055C	POL5	protein_coding	chrV	48471	51539	-1	108.72	84.11	0.00186289	1.3
													YNL307C	MCK1	protein_coding	chrXIV	56446	57573	-1	268.42	199.56	0.000705336	1.3
													YNR051C	BRE5	protein_coding	chrXIV	716780	718327	-1	129.97	96.3	0.00526334	1.3
													YML059C	NTE1	protein_coding	chrXIII	153219	158258	-1	59.09	43.87	0.000741742	1.3
													YMR205C	PFK2	protein_coding	chrXIII	671887	674766	-1	1604.98	1241.2	1.11022e-16	1.3
													YOL016C	CMK2	protein_coding	chrXV	294777	296120	-1	161.55	120.59	0.00461702	1.3
													YAL040C	CLN3	protein_coding	chrI	65778	67520	-1	135.43	101.6	0.00365057	1.3
													YAL021C	CCR4	protein_coding	chrI	110846	113359	-1	135.89	106.25	0.00248225	1.3
													YGR178C	PBP1	protein_coding	chrVII	851047	853215	-1	104.69	78.87	0.00491864	1.3
													YKL101W	HSL1	protein_coding	chrXI	248920	253476	1	51.8	38.64	0.00307855	1.3
													YKL096W-A	CWP2	protein_coding	chrXI	259253	259531	1	7321.69	5823.48	4.63984e-12	1.3
													YKR013W	PRY2	protein_coding	chrXI	463959	464948	1	361.17	267.8	0.00020587	1.3
													YDR011W	SNQ2	protein_coding	chrIV	465919	470424	1	139.03	108.79	4.40204e-05	1.3
													YCR012W	PGK1	protein_coding	chrIII	137746	138996	1	7705.1	6137.13	1.11022e-16	1.3
													YJL172W	CPS1	protein_coding	chrX	97737	99467	1	253.74	199.98	0.000876097	1.3
													YJL076W	NET1	protein_coding	chrX	295245	298814	1	108.8	84.91	0.00115471	1.3
													YLR056W	ERG3	protein_coding	chrXII	253861	254958	1	652.19	483.83	1.56443e-07	1.3
													YLR332W	MID2	protein_coding	chrXII	790676	791806	1	293.25	227.34	0.00208244	1.3
													YLR335W	NUP2	protein_coding	chrXII	797430	799592	1	105.91	80.02	0.00514408	1.3
													YLR390W-A	CCW14	protein_coding	chrXII	903724	904440	1	836.23	664.18	0.00016417	1.3
													YLR430W	SEN1	protein_coding	chrXII	993434	1000129	1	56.67	43.78	0.000851287	1.3
													YLR454W	FMP27	protein_coding	chrXII	1043998	1051884	1	41.29	30.82	0.000521972	1.3
													YHR108W	GGA2	protein_coding	chrVIII	328303	330060	1	280.44	224.22	0.000885396	1.3
													YHR143W	DSE2	protein_coding	chrVIII	385510	386487	1	829.98	627.08	1.38397e-07	1.3
													YEL022W	GEA2	protein_coding	chrV	111421	115800	1	82.77	63.27	0.000715048	1.3
													YER165W	PAB1	protein_coding	chrV	510373	512106	1	1460.08	1132.01	1.11022e-16	1.3
													YMR108W	ILV2	protein_coding	chrXIII	484084	486147	1	478.2	379.05	1.0876e-06	1.3
													YPR149W	NCE102	protein_coding	chrXVI	829918	830439	1	1259.28	964.05	5.81765e-06	1.3
													YOR014W	RTS1	protein_coding	chrXV	357674	359947	1	137.53	104.27	0.00123046	1.3
													YOR153W	PDR5	protein_coding	chrXV	619840	624375	1	1148.36	890.84	1.11022e-16	1.3
													YOR184W	SER1	protein_coding	chrXV	679357	680544	1	233.9	178.53	0.00290421	1.3
													YOR247W	SRL1	protein_coding	chrXV	797676	798308	1	849.65	644.85	2.40634e-05	1.3
													YGL178W	MPT5	protein_coding	chrVII	167352	170571	1	81.35	62.14	0.00393648	1.3
													YGR014W	MSB2	protein_coding	chrVII	516943	520863	1	170.44	132.68	1.68224e-05	1.3
													YGR116W	SPT6	protein_coding	chrVII	720409	724764	1	168.05	127.24	6.79497e-07	1.3
													YGR260W	TNA1	protein_coding	chrVII	1012485	1014089	1	222.16	173.91	0.00208892	1.3

## Sheet: DE genes in fpr4
List of DE genes in wt vs ∆fpr4
UP - regulated genes													DN - regulated genes
systematic name	standard name	orf type	chr	start	end	strand	wt_S27	fpr4-KAN_S29	pv	FC			systematic name	standard name	orf type	chr	start	end	strand	wt_S27	fpr4-KAN_S29	pv	FC
YAR071W	PHO11	protein_coding	chrI	225460	226863	1	0.71	27.68	1.8549e-09	39			YLR449W	FPR4	protein_coding	chrXII	1030834	1032012	1	198.52	0.8	5.55111e-17	246.9
YGR138C	TPO2	protein_coding	chrVII	763762	765606	-1	2.7	47.78	5.55111e-17	17.7			YOL093W	TRM10	protein_coding	chrXV	142815	143696	1	18.07	1.07	0.000256997	16.8
YER139C	RTR1	protein_coding	chrV	450563	451243	-1	1.46	22.27	0.000412438	15.2			YHR191C	CTF8	protein_coding	chrVIII	486230	486631	-1	34.69	2.36	0.000738845	14.7
YPR157W	TDA6	protein_coding	chrXVI	841266	842669	1	2.84	39.16	2.83911e-11	13.8			YKL061W	BLI1	protein_coding	chrXI	325771	326112	1	37.86	2.77	0.00125592	13.7
YCR021C	HSP30	protein_coding	chrIII	156109	157107	-1	21.93	184.06	5.55111e-17	8.4			YAL020C	ATS1	protein_coding	chrI	113614	114615	-1	22.86	1.89	2.35917e-05	12.1
YBR093C	PHO5	protein_coding	chrII	429548	430951	-1	19.15	129.62	5.55111e-17	6.8			YKL049C	CSE4	protein_coding	chrXI	346075	346764	-1	24.54	4.12	0.00149882	6
YHR136C	SPL2	protein_coding	chrVIII	374654	375100	-1	33.42	214.16	1.39888e-14	6.4			YPL064C	CWC27	protein_coding	chrXVI	428711	429616	-1	43.97	7.32	1.0544e-06	6
YBR054W	YRO2	protein_coding	chrII	343101	344135	1	17.32	109.89	1.11022e-16	6.3			YDR532C	KRE28	protein_coding	chrIV	1499396	1500553	-1	17.2	3.27	0.000902187	5.3
YML011C	RAD33	protein_coding	chrXIII	246895	247428	-1	5.6	28.4	0.00417839	5.1			YNL032W	SIW14	protein_coding	chrXIV	574506	575351	1	34.14	6.72	7.69235e-05	5.1
YDR281C	PHM6	protein_coding	chrIV	1022007	1022321	-1	12.65	63.19	0.00109653	5			YDR229W	IVY1	protein_coding	chrIV	924785	926146	1	35.1	6.96	3.87226e-07	5
YCL047C	POF1	protein_coding	chrIII	43661	44437	-1	5.13	24.4	0.00173053	4.8			YIR005W	IST3	protein_coding	chrIX	364889	365335	1	37.88	8.48	0.00381723	4.5
YOL009C	MDM12	protein_coding	chrXV	309324	310139	-1	3.66	17.42	0.00666322	4.8			YGL134W	PCL10	protein_coding	chrVII	255663	256964	1	25.24	5.82	6.76833e-05	4.3
YBL025W	RRN10	protein_coding	chrII	171481	171918	1	6.82	32.46	0.00666322	4.8			YDR480W	DIG2	protein_coding	chrIV	1417399	1418370	1	20.49	4.88	0.00218586	4.2
YLR099W-A	MIM2	protein_coding	chrXII	341325	341588	1	15.09	68.22	0.00272454	4.5			YGL226W	MTC3	protein_coding	chrVII	73340	73711	1	42.84	10.19	0.00613839	4.2
YPL060W	MFM1	protein_coding	chrXVI	434523	435764	1	4.81	19.84	0.000721993	4.1			YIL087C	AIM19	protein_coding	chrIX	199646	200119	-1	79.85	20	3.5827e-05	4
YHR215W	PHO12	protein_coding	chrVIII	552099	553502	1	30.5	122.19	5.55111e-17	4			YMR088C	VBA1	protein_coding	chrXIII	443414	445102	-1	33.02	8.42	6.41486e-07	3.9
YOR150W	MRPL23	protein_coding	chrXV	611999	612490	1	32.39	119.44	6.8163e-07	3.7			YBR211C	AME1	protein_coding	chrII	646158	647132	-1	49.03	13.61	9.46376e-06	3.6
YPR160W	GPH1	protein_coding	chrXVI	861306	864014	1	21.32	72.08	5.55111e-17	3.4			YOL054W	PSH1	protein_coding	chrXV	228614	229834	1	26.92	7.76	0.000315506	3.5
YHR092C	HXT4	protein_coding	chrVIII	287081	288811	-1	21.29	70.09	1.67828e-11	3.3			YKL159C	RCN1	protein_coding	chrXI	153816	154451	-1	40.72	11.92	0.00151372	3.4
YML123C	PHO84	protein_coding	chrXIII	24037	25800	-1	484.44	1587.25	5.55111e-17	3.3			YJR083C	ACF4	protein_coding	chrX	582608	583537	-1	31.06	9.17	0.000853488	3.4
YLR142W	PUT1	protein_coding	chrXII	425186	426616	1	9.05	29.14	9.67318e-05	3.2			YOR383C	FIT3	protein_coding	chrXV	1060441	1061055	-1	344.95	100.18	5.55111e-17	3.4
YNL160W	YGP1	protein_coding	chrXIV	336545	337609	1	40.21	129.94	1.12321e-12	3.2			YDR460W	TFB3	protein_coding	chrIV	1383811	1384776	1	29.9	8.83	0.000853488	3.4
YDR419W	RAD30	protein_coding	chrIV	1303174	1305072	1	5.24	16.47	0.000877022	3.1			YHR152W	SPO12	protein_coding	chrVIII	401434	401955	1	68.69	19.97	0.000179529	3.4
YCL033C	MXR2	protein_coding	chrIII	62776	63282	-1	19.64	57.95	0.00191181	3			YGL059W	PKP2	protein_coding	chrVII	392223	393698	1	24.29	7.06	0.000179529	3.4
YER062C	GPP2	protein_coding	chrV	279930	280682	-1	39.68	118.32	5.29152e-08	3			YML041C	VPS71	protein_coding	chrXIII	194913	195755	-1	33.08	10.12	0.00130564	3.3
YER150W	SPI1	protein_coding	chrV	468370	468816	1	55.7	165.39	7.68428e-07	3			YGR120C	COG2	protein_coding	chrVII	730033	730821	-1	44.18	13.21	0.00027385	3.3
YKL190W	CNB1	protein_coding	chrXI	82947	83550	1	14.84	42.37	0.00458225	2.9			YHR088W	RPF1	protein_coding	chrVIII	281495	282382	1	72.9	22.42	1.03929e-06	3.3
YDR240C	SNU56	protein_coding	chrIV	943674	945152	-1	9.43	26.28	0.000588705	2.8			YNL308C	KRI1	protein_coding	chrXIV	54122	55897	-1	32.53	10.14	4.70595e-06	3.2
YLL039C	UBI4	protein_coding	chrXII	64062	65207	-1	49.54	138.12	3.97227e-12	2.8			YGL044C	RNA15	protein_coding	chrVII	416146	417036	-1	23.47	7.45	0.00639496	3.2
YBR296C	PHO89	protein_coding	chrII	796798	798522	-1	33.49	92.86	3.57425e-12	2.8			YER011W	TIR1	protein_coding	chrV	175248	176012	1	95.04	29.74	2.97815e-07	3.2
YBR183W	YPC1	protein_coding	chrII	596115	597065	1	23.04	64.78	1.3391e-05	2.8			YMR032W	HOF1	protein_coding	chrXIII	335298	337307	1	18.83	6.13	0.000304074	3.1
YLR114C	AVL9	protein_coding	chrXII	374944	377238	-1	7.81	21.06	0.000180846	2.7			YGL257C	MNT2	protein_coding	chrVII	12481	14157	-1	43.36	14.7	1.04926e-06	3
YPL019C	VTC3	protein_coding	chrXVI	514511	517018	-1	128.27	346.94	5.55111e-17	2.7			YGL025C	PGD1	protein_coding	chrVII	448764	449957	-1	33.37	11.11	0.000258165	3
YOL048C	RRT8	protein_coding	chrXV	240204	241310	-1	11.7	31.68	0.00137565	2.7			YOL144W	NOP8	protein_coding	chrXV	53098	54552	1	17.8	5.86	0.00301499	3
YLL027W	ISA1	protein_coding	chrXII	87403	88155	1	31.74	85.59	1.53484e-05	2.7			YDL197C	ASF2	protein_coding	chrIV	104917	106494	-1	35.98	12.61	2.44692e-05	2.9
YHR101C	BIG1	protein_coding	chrVIII	314874	315968	-1	10.91	28.56	0.00321782	2.6			YOR060C	SLD7	protein_coding	chrXV	440390	441163	-1	46.32	15.92	0.000678534	2.9
YNL024C-A	KSH1	protein_coding	chrXIV	586602	586820	-1	54.57	142.82	0.00321782	2.6			YLL022C	HIF1	protein_coding	chrXII	99044	100201	-1	36.12	13.1	0.000400097	2.8
YOR107W	RGS2	protein_coding	chrXV	521353	522282	1	20.35	51.98	0.000324575	2.6			YGR009C	SEC9	protein_coding	chrVII	509047	511002	-1	22.91	8.24	0.000228057	2.8
YLR139C	SLS1	protein_coding	chrXII	421542	423473	-1	7.73	19.13	0.00218261	2.5			YGR197C	SNG1	protein_coding	chrVII	892497	894140	-1	19.39	6.92	0.00178449	2.8
YMR105C	PGM2	protein_coding	chrXIII	475897	477606	-1	28.54	70.95	2.5093e-08	2.5			YDR244W	PEX5	protein_coding	chrIV	950563	952401	1	34.66	12.37	9.96587e-06	2.8
YEL038W	UTR4	protein_coding	chrV	80462	81145	1	24.75	60.97	0.00118471	2.5			YOR073W	SGO1	protein_coding	chrXV	464771	466543	1	30.9	11.23	5.24252e-05	2.8
YGL209W	MIG2	protein_coding	chrVII	95858	97006	1	24.27	61.87	1.34774e-05	2.5			YMR199W	CLN1	protein_coding	chrXIII	662644	664284	1	79.51	29.46	7.46049e-10	2.7
YGR031W	IMO32	protein_coding	chrVII	546441	547469	1	16.45	41.45	0.000838673	2.5			YLR181C	VTA1	protein_coding	chrXII	516678	517670	-1	35.1	13.36	0.0018145	2.6
YLR038C	COX12	protein_coding	chrXII	224921	225172	-1	55.33	131.64	0.00498597	2.4			YFL013C	IES1	protein_coding	chrVI	107852	109930	-1	34.97	13.68	1.02408e-05	2.6
YOR178C	GAC1	protein_coding	chrXV	667860	670241	-1	12.54	30.64	2.04725e-05	2.4			YER161C	SPT2	protein_coding	chrV	499347	500348	-1	43.74	17.03	0.000587045	2.6
YDL064W	UBC9	protein_coding	chrIV	337487	338070	1	27.29	63.3	0.00375576	2.3			YNL042W	BOP3	protein_coding	chrXIV	548100	549290	1	33.45	12.73	0.000854901	2.6
YBR006W	UGA2	protein_coding	chrII	247010	248503	1	12	27.91	0.00202806	2.3			YIL155C	GUT2	protein_coding	chrIX	51759	53708	-1	32.18	13.12	7.42924e-05	2.5
YER057C	HMF1	protein_coding	chrV	270737	271126	-1	104.71	230.88	1.62332e-05	2.2			YBL105C	PKC1	protein_coding	chrII	14241	17696	-1	55.33	21.94	1.46605e-12	2.5
YLR266C	PDR8	protein_coding	chrXII	675619	677724	-1	17.5	36.01	0.00023307	2.1			YPR173C	VPS4	protein_coding	chrXVI	886524	887837	-1	56.85	22.36	8.5134e-06	2.5
YFR053C	HXK1	protein_coding	chrVI	253592	255049	-1	127.06	263.94	5.55111e-17	2.1			YDR356W	SPC110	protein_coding	chrIV	1186107	1188941	1	27.05	11.03	1.18532e-05	2.5
YOL003C	PFA4	protein_coding	chrXV	321858	322994	-1	21.02	43.35	0.00294043	2.1			YFR001W	LOC1	protein_coding	chrVI	149110	149724	1	80.97	32.37	0.000332267	2.5
YIL106W	MOB1	protein_coding	chrIX	166415	167444	1	20.31	43.25	0.00341624	2.1			YER112W	LSM4	protein_coding	chrV	387232	387795	1	134.21	53.78	1.00755e-05	2.5
YGR028W	MSP1	protein_coding	chrVII	542203	543291	1	21.04	44.39	0.00252856	2.1			YOR158W	PET123	protein_coding	chrXV	632164	633120	1	43.71	17.83	0.00121624	2.5
YER053C	PIC2	protein_coding	chrV	258737	259639	-1	41.91	85.02	0.000268081	2			YJL123C	MTC1	protein_coding	chrX	188004	189440	-1	45.05	18.47	6.14132e-05	2.4
YER130C	COM2	protein_coding	chrV	421115	422446	-1	40.38	78.99	4.35313e-05	2			YBR272C	HSM3	protein_coding	chrII	746361	747803	-1	20.71	8.54	0.00675202	2.4
YOR103C	OST2	protein_coding	chrXV	516449	516841	-1	76.03	149.53	0.00210409	2			YNL229C	URE2	protein_coding	chrXIV	219137	220201	-1	57.98	24.03	0.000105395	2.4
YDL159W	STE7	protein_coding	chrIV	172481	174028	1	18.02	36.74	0.00160312	2			YIL144W	NDC80	protein_coding	chrIX	78074	80149	1	24.47	10.04	0.000391952	2.4
YJL117W	PHO86	protein_coding	chrX	192531	193466	1	119.18	232.91	4.16539e-09	2			YGR040W	KSS1	protein_coding	chrVII	575398	576504	1	71.08	29.97	1.61333e-05	2.4
YBR293W	VBA2	protein_coding	chrII	787006	788430	1	18.17	36.58	0.00291174	2			YIL127C	RRT14	protein_coding	chrIX	117024	117644	-1	62.55	27.47	0.0035018	2.3
YDR117C	TMA64	protein_coding	chrIV	683946	685643	-1	21.7	40.75	0.001645	1.9			YCR054C	CTR86	protein_coding	chrIII	218376	220067	-1	30.61	13.44	0.000747403	2.3
YOL064C	MET22	protein_coding	chrXV	206103	207176	-1	66.77	123.55	1.90726e-05	1.9			YFR031C	SMC2	protein_coding	chrVI	216594	220106	-1	17.29	7.55	0.000242176	2.3
YGR216C	GPI1	protein_coding	chrVII	922633	924462	-1	23.4	44.03	0.000661147	1.9			YMR197C	VTI1	protein_coding	chrXIII	658545	659198	-1	80.71	34.78	0.000531965	2.3
YGR295C	COS6	protein_coding	chrVII	1081584	1082729	-1	92.99	174.51	8.89061e-08	1.9			YDR137W	RGP1	protein_coding	chrIV	728259	730250	1	26.5	11.42	0.000531965	2.3
YER067W	RGI1	protein_coding	chrV	292066	292551	1	139.35	259.39	2.66695e-05	1.9			YFL023W	BUD27	protein_coding	chrVI	90986	93376	1	17.91	7.93	0.00233658	2.3
YER072W	VTC1	protein_coding	chrV	302806	303195	1	462.24	889.51	3.48388e-13	1.9			YGL227W	VID30	protein_coding	chrVII	69671	72547	1	21.46	9.22	0.000172744	2.3
YBL089W	AVT5	protein_coding	chrII	49574	50953	1	25.98	50.14	0.00111378	1.9			YGL162W	SUT1	protein_coding	chrVII	198138	199037	1	44.27	18.96	0.0024738	2.3
YML100W	TSL1	protein_coding	chrXIII	70624	73920	1	56.79	107.23	7.63167e-13	1.9			YGL086W	MAD1	protein_coding	chrVII	347119	349368	1	32.76	14.32	5.36776e-05	2.3
YPL081W	RPS9A	protein_coding	chrXVI	404950	406044	1	58.21	109.07	3.72522e-05	1.9			YGR142W	BTN2	protein_coding	chrVII	772454	773686	1	58.97	26.14	7.47342e-05	2.3
YGR134W	CAF130	protein_coding	chrVII	757770	761138	1	12.12	23.35	0.00052246	1.9			YJL165C	HAL5	protein_coding	chrX	106894	109461	-1	82.61	36.91	1.89226e-11	2.2
YDR032C	PST2	protein_coding	chrIV	504099	504695	-1	100.1	179.41	0.000239023	1.8			YLL010C	PSR1	protein_coding	chrXII	129330	130613	-1	48.87	22.15	0.000316488	2.2
YJL012C	VTC4	protein_coding	chrX	411234	413399	-1	201.4	370.65	5.55111e-17	1.8			YNL173C	MDG1	protein_coding	chrXIV	308957	310057	-1	56.09	25.83	0.000437872	2.2
YBR052C	RFS1	protein_coding	chrII	338720	339352	-1	61.36	107.81	0.00440364	1.8			YPR141C	KAR3	protein_coding	chrXVI	815734	817923	-1	20.01	9.09	0.00267323	2.2
YMR168C	CEP3	protein_coding	chrXIII	597332	599158	-1	17.99	33.2	0.00396937	1.8			YOR089C	VPS21	protein_coding	chrXV	490196	490828	-1	56.64	25.46	0.00605509	2.2
YGR209C	TRX2	protein_coding	chrVII	912913	913227	-1	328.83	607.82	2.92788e-07	1.8			YDR406W	PDR15	protein_coding	chrIV	1279210	1283799	1	27.12	12.6	7.43779e-07	2.2
YJL052W	TDH1	protein_coding	chrX	338271	339269	1	291.12	516.14	2.10942e-15	1.8			YJL140W	RPB4	protein_coding	chrX	150961	151626	1	88.23	39.85	0.000470787	2.2
YLR258W	GSY2	protein_coding	chrXII	660716	662833	1	66.3	119.49	1.26048e-08	1.8			YLL008W	DRS1	protein_coding	chrXII	131729	133987	1	65.69	30.21	4.80885e-08	2.2
YBL068W	PRS4	protein_coding	chrII	92414	93394	1	53.81	99.52	0.000247755	1.8			YLR019W	PSR2	protein_coding	chrXII	180288	181481	1	115.11	53.19	1.71492e-07	2.2
YKL196C	YKT6	protein_coding	chrXI	74932	75534	-1	122.23	204.34	0.000405086	1.7			YMR086W	SEG1	protein_coding	chrXIII	439208	442090	1	44.57	20.05	2.11552e-07	2.2
YDL025C	RTK1	protein_coding	chrIV	405344	407206	-1	31.54	52.4	0.00183981	1.7			YMR179W	SPT21	protein_coding	chrXIII	619858	622134	1	22.31	9.99	0.00104572	2.2
YBL087C	RPL23A	protein_coding	chrII	59822	60739	-1	189.87	318.01	4.743e-08	1.7			YPR062W	FCY1	protein_coding	chrXVI	677165	677641	1	75.17	33.78	0.00605509	2.2
YPR156C	TPO3	protein_coding	chrXVI	837909	839777	-1	38.9	65.42	0.00037399	1.7			YPR175W	DPB2	protein_coding	chrXVI	888974	891043	1	23.1	10.53	0.00178258	2.2
YOL155C	HPF1	protein_coding	chrXV	28703	31606	-1	13.72	23.5	0.00617142	1.7			YPR185W	ATG13	protein_coding	chrXVI	907218	909434	1	17.97	8.12	0.00401801	2.2
YKL160W	ELF1	protein_coding	chrXI	153269	153706	1	97.78	164.46	0.00630224	1.7			YGL111W	NSA1	protein_coding	chrVII	299978	301369	1	82.28	38.13	1.95642e-06	2.2
YKL033W	TTI1	protein_coding	chrXI	375456	378572	1	14.38	24.94	0.00288988	1.7			YDL234C	GYP7	protein_coding	chrIV	34237	36477	-1	79.11	37.64	8.50852e-09	2.1
YKR074W	AIM29	protein_coding	chrXI	579209	579676	1	91.51	153.92	0.00630224	1.7			YDR200C	VPS64	protein_coding	chrIV	854279	856093	-1	25.24	12.01	0.00342082	2.1
YIL015W	BAR1	protein_coding	chrIX	322342	324105	1	107.84	183.76	3.24501e-09	1.7			YBR227C	MCX1	protein_coding	chrII	673572	675134	-1	30.59	14.55	0.00278878	2.1
YIR037W	HYR1	protein_coding	chrIX	423128	423619	1	131.58	225.4	0.000481294	1.7			YML061C	PIF1	protein_coding	chrXIII	148953	151532	-1	22	10.65	0.00138635	2.1
YDR527W	RBA50	protein_coding	chrIV	1491094	1492413	1	40.74	67.5	0.00306485	1.7			YMR062C	ARG7	protein_coding	chrXIII	395054	396379	-1	56.33	27.16	0.000229161	2.1
YHR162W	MPC2	protein_coding	chrVIII	423072	423461	1	188.98	325.67	0.000162329	1.7			YMR218C	TRS130	protein_coding	chrXIII	703579	706887	-1	19.56	9.45	0.000620523	2.1
YNL261W	ORC5	protein_coding	chrXIV	155100	156539	1	29.05	50.02	0.0045526	1.7			YPL007C	TFC8	protein_coding	chrXVI	542082	543848	-1	32.69	15.56	0.00101314	2.1
YOR092W	ECM3	protein_coding	chrXV	495127	496968	1	51.91	89.02	2.11153e-05	1.7			YOR038C	HIR2	protein_coding	chrXV	402761	405388	-1	19.33	9.02	0.00164982	2.1
YGL191W	COX13	protein_coding	chrVII	144808	145197	1	166	279.49	0.000763209	1.7			YOR056C	NOB1	protein_coding	chrXV	430247	431626	-1	69.29	32.28	1.5381e-05	2.1
YKL116C	PRR1	protein_coding	chrXI	221344	222900	-1	33.26	53.57	0.00641895	1.6			YOR308C	SNU66	protein_coding	chrXV	894624	896387	-1	29.36	13.97	0.00185696	2.1
YKR038C	KAE1	protein_coding	chrXI	511999	513159	-1	47.18	75.11	0.00638565	1.6			YDR176W	NGG1	protein_coding	chrIV	814452	816560	1	25.97	12.58	0.00169693	2.1
YDL188C	PPH22	protein_coding	chrIV	123865	124998	-1	57.09	88.6	0.00532956	1.6			YDR227W	SIR4	protein_coding	chrIV	917571	921647	1	21.5	10.23	5.15192e-05	2.1
YDL048C	STP4	protein_coding	chrIV	366739	368211	-1	95.34	151.86	1.2245e-05	1.6			YDR425W	SNX41	protein_coding	chrIV	1320064	1321941	1	21.21	10.09	0.00634145	2.1
YDR328C	SKP1	protein_coding	chrIV	1125434	1126018	-1	102.15	166.88	0.00248222	1.6			YLR405W	DUS4	protein_coding	chrXII	929789	930892	1	42.4	19.75	0.00247536	2.1
YDR447C	RPS17B	protein_coding	chrIV	1354829	1355553	-1	380.53	618.38	1.33989e-10	1.6			YHR110W	ERP5	protein_coding	chrVIII	332282	332920	1	74.82	35.6	0.00278878	2.1
YBR055C	PRP6	protein_coding	chrII	344602	347301	-1	21.76	34.75	0.00443023	1.6			YER030W	CHZ1	protein_coding	chrV	213437	213898	1	118.57	57.44	0.00169693	2.1
YAL044C	GCV3	protein_coding	chrI	57950	58462	-1	100.96	164.44	0.00515015	1.6			YNL289W	PCL1	protein_coding	chrXIV	87897	88736	1	55.73	25.95	0.00247536	2.1
YGR132C	PHB1	protein_coding	chrVII	755589	756452	-1	125.65	198.56	0.000161506	1.6			YDR408C	ADE8	protein_coding	chrIV	1288215	1288859	-1	120.44	61.72	0.000461175	2
YKL216W	URA1	protein_coding	chrXI	25215	26159	1	528.03	825.47	3.33067e-15	1.6			YLR221C	RSA3	protein_coding	chrXII	578362	579024	-1	100.65	50.04	0.000765728	2
YDR033W	MRH1	protein_coding	chrIV	508147	509109	1	1226.61	1984.26	5.55111e-17	1.6			YML038C	YMD8	protein_coding	chrXIII	202775	204103	-1	128.15	64.19	9.87214e-08	2
YLR064W	PER33	protein_coding	chrXII	265456	266277	1	90.87	141.83	0.00240138	1.6			YPL011C	TAF3	protein_coding	chrXVI	533642	534703	-1	56.27	28.56	0.00188661	2
YMR022W	UBC7	protein_coding	chrXIII	318680	319177	1	106	171.3	0.00554355	1.6			YCR036W	RBK1	protein_coding	chrIII	193297	194298	1	51.69	26.49	0.00424101	2
YMR251W-A	HOR7	protein_coding	chrXIII	774752	774931	1	453.72	705.61	0.00165584	1.6			YJR138W	IML1	protein_coding	chrX	684567	689321	1	21.36	10.76	4.36079e-05	2
YPR080W	TEF1	protein_coding	chrXVI	700594	701970	1	1395.96	2183.4	5.55111e-17	1.6			YHL025W	SNF6	protein_coding	chrVIII	54851	55849	1	43.87	21.82	0.00643403	2
YGL030W	RPL30	protein_coding	chrVII	439091	439638	1	627.03	977.24	8.72175e-11	1.6			YHR169W	DBP8	protein_coding	chrVIII	442181	443476	1	60.71	30.72	0.000344515	2
YJR145C	RPS4A	protein_coding	chrX	702027	703068	-1	1256.92	1846.55	5.55111e-17	1.5			YER176W	ECM32	protein_coding	chrV	541690	545055	1	26.93	13.8	0.000154969	2
YNL037C	IDH1	protein_coding	chrXIV	557920	559002	-1	180.25	272.19	6.5327e-06	1.5			YBR290W	BSD2	protein_coding	chrII	782591	783556	1	45.37	22.57	0.00643403	2
YKL062W	MSN4	protein_coding	chrXI	323228	325120	1	44.72	66.59	0.0042515	1.5			YKR071C	DRE2	protein_coding	chrXI	574934	575980	-1	150.3	79.67	1.77922e-06	1.9
YDL236W	PHO13	protein_coding	chrIV	32296	33234	1	98.64	146.36	0.00306495	1.5			YDR490C	PKH1	protein_coding	chrIV	1431968	1434268	-1	24.67	13.18	0.00451838	1.9
YDR055W	PST1	protein_coding	chrIV	563527	564861	1	137.27	211.58	4.08179e-06	1.5			YFL044C	OTU1	protein_coding	chrVI	44655	45560	-1	73.65	38.71	0.00166018	1.9
YDR064W	RPS13	protein_coding	chrIV	579458	580452	1	888.87	1292.68	5.55111e-17	1.5			YNL315C	ATP11	protein_coding	chrXIV	43324	44280	-1	59.32	30.7	0.00310222	1.9
YCL040W	GLK1	protein_coding	chrIII	50838	52340	1	286.93	439.55	3.45524e-12	1.5			YMR302C	YME2	protein_coding	chrXIII	870073	872625	-1	35.11	18.93	0.000425253	1.9
YBR118W	TEF2	protein_coding	chrII	477671	479047	1	2031.74	3033.49	5.55111e-17	1.5			YGL023C	PIB2	protein_coding	chrVII	450197	452104	-1	30.8	15.9	0.00253534	1.9
YNR030W	ALG12	protein_coding	chrXIV	678799	680454	1	73.38	111.61	0.000287764	1.5			YGR005C	TFG2	protein_coding	chrVII	504657	505859	-1	59.61	31.52	0.00121502	1.9
YML022W	APT1	protein_coding	chrXIII	228937	229500	1	301.97	448.71	5.5441e-05	1.5			YGR065C	VHT1	protein_coding	chrVII	618077	619858	-1	36.89	19.68	0.00220453	1.9
YPR132W	RPS23B	protein_coding	chrXVI	794965	795767	1	246.82	375.36	3.68718e-06	1.5			YKR008W	RSC4	protein_coding	chrXI	452201	454078	1	63.64	33.31	2.32686e-05	1.9
YGR135W	PRE9	protein_coding	chrVII	761392	762168	1	147.41	218.36	0.0010473	1.5			YDL150W	RPC53	protein_coding	chrIV	183343	184611	1	67.5	35.85	0.000440348	1.9
YIL074C	SER33	protein_coding	chrIX	221081	222490	-1	108.07	153.94	0.000745221	1.4			YDR128W	MTC5	protein_coding	chrIV	709549	712995	1	33.52	17.6	3.42337e-05	1.9
YDR407C	TRS120	protein_coding	chrIV	1284069	1287938	-1	33.71	47.76	0.0021536	1.4			YDR379W	RGA2	protein_coding	chrIV	1230167	1233196	1	19.39	10.01	0.00253534	1.9
YDR481C	PHO8	protein_coding	chrIV	1418550	1420250	-1	94.86	132.62	0.00106343	1.4			YDR519W	FPR2	protein_coding	chrIV	1480425	1480832	1	153.79	78.99	0.00169575	1.9
YDR502C	SAM2	protein_coding	chrIV	1453310	1454464	-1	160.39	230.6	0.000130923	1.4			YLR182W	SWI6	protein_coding	chrXII	517940	520351	1	31.8	16.5	0.00061524	1.9
YDR505C	PSP1	protein_coding	chrIV	1456695	1459220	-1	57.57	79.17	0.0032441	1.4			YLR187W	SKG3	protein_coding	chrXII	524865	527945	1	33.62	17.54	7.61134e-05	1.9
YDR516C	EMI2	protein_coding	chrIV	1474974	1476476	-1	95.42	138.11	0.000598467	1.4			YHR102W	KIC1	protein_coding	chrVIII	316572	319814	1	46.37	24.55	2.90667e-06	1.9
YCR031C	RPS14A	protein_coding	chrIII	177500	178220	-1	1414.54	1953.52	2.66453e-15	1.4			YFL008W	SMC1	protein_coding	chrVI	119429	123106	1	26	13.4	0.00011464	1.9
YJR139C	HOM6	protein_coding	chrX	689445	690524	-1	538.57	729.31	2.40669e-08	1.4			YBR073W	RDH54	protein_coding	chrII	383112	385988	1	61.27	32.29	3.48785e-07	1.9
YER055C	HIS1	protein_coding	chrV	264892	265785	-1	367.64	520.57	1.15682e-06	1.4			YBR083W	TEC1	protein_coding	chrII	409169	410629	1	74.31	38.28	3.89239e-05	1.9
YMR145C	NDE1	protein_coding	chrXIII	554793	556475	-1	227.25	327.77	2.88209e-08	1.4			YMR192W	GYL1	protein_coding	chrXIII	647118	649280	1	25.33	13.15	0.00379777	1.9
YPL004C	LSP1	protein_coding	chrXVI	550632	551657	-1	360.14	520.11	4.4014e-08	1.4			YPL254W	HFI1	protein_coding	chrXVI	69485	70951	1	54.99	29.07	0.00060006	1.9
YOL120C	RPL18A	protein_coding	chrXV	93395	94402	-1	1008.82	1437.74	5.55111e-17	1.4			YDL213C	NOP6	protein_coding	chrIV	77289	77966	-1	91.08	50.33	0.00468149	1.8
YGL001C	ERG26	protein_coding	chrVII	495453	496502	-1	116.67	161.58	0.00568732	1.4			YDR384C	ATO3	protein_coding	chrIV	1241204	1242031	-1	127.5	70.97	0.000252531	1.8
YGR233C	PHO81	protein_coding	chrVII	954674	958210	-1	40.27	57.62	0.000948488	1.4			YDR443C	SSN2	protein_coding	chrIV	1345676	1349938	-1	22.2	12.45	0.000612897	1.8
YKL006W	RPL14A	protein_coding	chrXI	431906	432720	1	306.74	430.31	3.81193e-05	1.4			YLR026C	SED5	protein_coding	chrXII	195450	196472	-1	58.42	32.43	0.00570979	1.8
YKR057W	RPS21A	protein_coding	chrXI	551657	552242	1	270.24	391.43	0.000300503	1.4			YLR370C	ARC18	protein_coding	chrXII	861718	862254	-1	133.54	75.9	0.00343962	1.8
YDL022W	GPD1	protein_coding	chrIV	411825	413000	1	260	357.86	1.87798e-05	1.4			YHL047C	ARN2	protein_coding	chrVIII	8351	10213	-1	53.46	30.53	0.000617804	1.8
YLR214W	FRE1	protein_coding	chrXII	568567	570627	1	57.51	81.4	0.00353147	1.4			YER172C	BRR2	protein_coding	chrV	529530	536021	-1	35.44	19.56	4.59128e-08	1.8
YFR030W	MET10	protein_coding	chrVI	213312	216419	1	37.17	53.37	0.00263231	1.4			YNL110C	NOP15	protein_coding	chrXIV	417826	418488	-1	162.24	90.07	0.000208662	1.8
YEL052W	AFG1	protein_coding	chrV	56571	58100	1	67.05	96.64	0.00413573	1.4			YML059C	NTE1	protein_coding	chrXIII	153219	158258	-1	59.09	32.35	3.12524e-10	1.8
YEL011W	GLC3	protein_coding	chrV	133120	135234	1	60.75	86.04	0.00233805	1.4			YOL007C	CSI2	protein_coding	chrXV	311342	312367	-1	99.02	55.43	0.000369886	1.8
YNL067W	RPL9B	protein_coding	chrXIV	499681	500256	1	561.97	803.03	6.92721e-07	1.4			YOR138C	RUP1	protein_coding	chrXV	584309	586324	-1	33.1	18.34	0.00339322	1.8
YPR028W	YOP1	protein_coding	chrXVI	623527	624202	1	262.25	354.74	0.00215259	1.4			YGR161C	RTS3	protein_coding	chrVII	808629	809420	-1	83	46.67	0.0044364	1.8
YAL017W	PSK1	protein_coding	chrI	120225	124295	1	42.57	58.21	0.00163166	1.4			YGR276C	RNH70	protein_coding	chrVII	1043819	1045480	-1	43.75	24.52	0.00264454	1.8
YGL135W	RPL1B	protein_coding	chrVII	254641	255294	1	1439.14	1966.69	2.34812e-13	1.4			YDL093W	PMT5	protein_coding	chrIV	289909	292140	1	34.36	18.68	0.00127001	1.8
YGL055W	OLE1	protein_coding	chrVII	398628	400160	1	999.23	1370.75	5.55111e-17	1.4			YJR002W	MPP10	protein_coding	chrX	438865	440646	1	72.66	39.36	2.56016e-05	1.8
YGR034W	RPL26B	protein_coding	chrVII	555812	556672	1	458.08	656.11	3.435e-08	1.4			YJR032W	CPR7	protein_coding	chrX	491081	492262	1	53.93	30.47	0.00539945	1.8
YDR144C	MKC7	protein_coding	chrIV	744311	746101	-1	100.65	133.36	0.00412862	1.3			YHR216W	IMD2	protein_coding	chrVIII	554396	555967	1	97.57	54.27	1.00341e-05	1.8
YDR155C	CPR1	protein_coding	chrIV	768512	769000	-1	3071.44	4049.14	4.44089e-16	1.3			YNL278W	CAF120	protein_coding	chrXIV	113271	116453	1	29.73	16.97	0.000846923	1.8
YDR345C	HXT3	protein_coding	chrIV	1162957	1164660	-1	839.33	1108.59	1.44329e-15	1.3			YNL075W	IMP4	protein_coding	chrXIV	485607	486479	1	75.3	41.26	0.00314972	1.8
YLR043C	TRX1	protein_coding	chrXII	231702	232013	-1	702.29	938.72	0.00108457	1.3			YML010W	SPT5	protein_coding	chrXIII	247677	250868	1	73.01	41.57	1.44214e-07	1.8
YLR304C	ACO1	protein_coding	chrXII	735212	737548	-1	321.76	421.8	1.89518e-08	1.3			YMR316W	DIA1	protein_coding	chrXIII	904825	905835	1	118.22	65.63	9.27238e-05	1.8
YLR325C	RPL38	protein_coding	chrXII	781143	781379	-1	1941.53	2519.57	2.4111e-05	1.3			YPL043W	NOP4	protein_coding	chrXVI	469939	471996	1	79.85	44.67	5.8233e-06	1.8
YLR354C	TAL1	protein_coding	chrXII	836350	837357	-1	700.54	930.91	9.49925e-09	1.3			YOL011W	PLB3	protein_coding	chrXV	305349	307409	1	92.78	52.89	1.97031e-06	1.8
YHR007C	ERG11	protein_coding	chrVIII	120091	121683	-1	694.62	887.15	9.12862e-10	1.3			YOR217W	RFC1	protein_coding	chrXV	749301	751886	1	34.66	19.06	0.000600788	1.8
YBR126C	TPS1	protein_coding	chrII	488905	490392	-1	182.73	242.69	0.000378734	1.3			YOR382W	FIT2	protein_coding	chrXV	1059531	1059992	1	310.43	168.23	9.50936e-06	1.8
YBR234C	ARC40	protein_coding	chrII	685438	686592	-1	178.5	235.52	0.00253769	1.3			YDL077C	VAM6	protein_coding	chrIV	316971	320120	-1	25.61	15.35	0.00432681	1.7
YNL055C	POR1	protein_coding	chrXIV	517994	518845	-1	848.69	1102.47	1.06332e-07	1.3			YCR037C	PHO87	protein_coding	chrIII	194414	197185	-1	51.02	30.43	0.000140736	1.7
YNR053C	NOG2	protein_coding	chrXIV	721120	723112	-1	173.41	226.38	0.000177865	1.3			YJL187C	SWE1	protein_coding	chrX	76803	79262	-1	28.75	16.95	0.0061005	1.7
YMR261C	TPS3	protein_coding	chrXIII	790205	793369	-1	86.54	113.2	0.000767919	1.3			YJL157C	FAR1	protein_coding	chrX	123836	126328	-1	88.29	52.47	1.76553e-06	1.7
YPL183C	RTT10	protein_coding	chrXVI	199495	202536	-1	63.52	83.82	0.00346131	1.3			YER111C	SWI4	protein_coding	chrV	382595	385876	-1	26.71	15.6	0.00192374	1.7
YPL154C	PEP4	protein_coding	chrXVI	259714	260931	-1	506.98	667.69	2.13951e-07	1.3			YBL051C	PIN4	protein_coding	chrII	122753	124759	-1	112.65	68.01	2.40185e-06	1.7
YOL126C	MDH2	protein_coding	chrXV	81787	82920	-1	221.33	295.05	0.000534679	1.3			YBR132C	AGP2	protein_coding	chrII	499652	501442	-1	53.39	32.28	0.00222571	1.7
YAL005C	SSA1	protein_coding	chrI	139503	141431	-1	798.74	1003.36	1.94615e-11	1.3			YPL259C	APM1	protein_coding	chrXVI	51244	52671	-1	78.81	47.13	0.000719818	1.7
YGL076C	RPL7A	protein_coding	chrVII	364335	365996	-1	370.94	472.21	6.59737e-06	1.3			YPR095C	SYT1	protein_coding	chrXVI	721037	724717	-1	20.02	11.59	0.00391276	1.7
YGR282C	BGL2	protein_coding	chrVII	1057783	1058724	-1	1146.12	1482.13	1.8167e-10	1.3			YPR112C	MRD1	protein_coding	chrXVI	749256	751919	-1	72.53	42.34	4.06178e-06	1.7
YDR382W	RPP2B	protein_coding	chrIV	1239492	1239824	1	3257.12	4115.83	7.27791e-09	1.3			YOR035C	SHE4	protein_coding	chrXV	397735	400104	-1	51.69	30.79	0.000385158	1.7
YJR105W	ADO1	protein_coding	chrX	623581	624603	1	468.29	612.43	8.79045e-06	1.3			YDL225W	SHS1	protein_coding	chrIV	52445	54100	1	64.96	37.2	0.00039803	1.7
YHR183W	GND1	protein_coding	chrVIII	470960	472429	1	659.24	838.22	1.90157e-08	1.3			YDR213W	UPC2	protein_coding	chrIV	889751	892492	1	31.96	18.67	0.00192374	1.7
YFL031W	HAC1	protein_coding	chrVI	75179	76147	1	839.75	1090.65	1.75647e-08	1.3			YLR206W	ENT2	protein_coding	chrXII	554578	556419	1	81.65	49.4	0.000127073	1.7
YER117W	RPL23B	protein_coding	chrV	396769	397653	1	294.85	393.06	0.000414765	1.3			YLR357W	RSC2	protein_coding	chrXII	841331	844000	1	57.82	34.79	8.8794e-05	1.7
YBR158W	AMN1	protein_coding	chrII	556549	558198	1	216.7	292.39	1.56602e-05	1.3			YHR204W	MNL1	protein_coding	chrVIII	506319	508709	1	53.74	30.92	0.00012153	1.7
YNL123W	NMA111	protein_coding	chrXIV	394685	397678	1	79.51	103.84	0.00182919	1.3			YEL065W	SIT1	protein_coding	chrV	27657	29543	1	165.2	96.44	4.8258e-09	1.7
YMR143W	RPS16A	protein_coding	chrXIII	551928	552903	1	650.04	819.65	1.18193e-05	1.3			YBL032W	HEK2	protein_coding	chrII	160184	161329	1	173.82	103.39	5.65044e-06	1.7
YPL220W	RPL1A	protein_coding	chrXVI	135790	136443	1	1279.24	1692.77	7.81293e-10	1.3			YNL233W	BNI4	protein_coding	chrXIV	211922	214600	1	38.66	23	0.0010635	1.7
YPL079W	RPL21B	protein_coding	chrXVI	406636	407539	1	548.67	695.15	7.55297e-05	1.3			YNR006W	VPS27	protein_coding	chrXIV	636986	638854	1	46.36	27.89	0.00331487	1.7
YPR113W	PIS1	protein_coding	chrXVI	752257	752919	1	310.96	418.88	0.00111354	1.3			YPL179W	PPQ1	protein_coding	chrXVI	208157	209806	1	144.87	87.32	1.15673e-06	1.7
YOR085W	OST3	protein_coding	chrXV	482033	483085	1	232.68	296.14	0.00453209	1.3			YPR129W	SCD6	protein_coding	chrXVI	792687	793736	1	130.9	76.73	0.000112885	1.7
YOR096W	RPS7A	protein_coding	chrXV	505794	506767	1	779.19	1034.45	3.04851e-09	1.3			YPR154W	PIN3	protein_coding	chrXVI	834565	835212	1	173.68	100.93	0.000396638	1.7
YOR136W	IDH2	protein_coding	chrXV	580250	581359	1	270.98	363.76	0.000100599	1.3			YOR043W	WHI2	protein_coding	chrXV	410870	412330	1	73.62	43.47	0.000734278	1.7
YOR176W	HEM15	protein_coding	chrXV	662401	663582	1	133.98	178.82	0.00572527	1.3			YOR113W	AZF1	protein_coding	chrXV	534075	536819	1	38.82	23.48	0.0012468	1.7
YGL103W	RPL28	protein_coding	chrVII	310967	311927	1	602.15	783.12	1.77254e-06	1.3			YOR132W	VPS17	protein_coding	chrXV	573175	574830	1	51.72	30.34	0.00232404	1.7
YGL012W	ERG4	protein_coding	chrVII	472855	474276	1	369.11	470.59	2.8465e-05	1.3			YGL169W	SUA5	protein_coding	chrVII	186059	187339	1	59.87	35.52	0.00467634	1.7
YGR214W	RPS0A	protein_coding	chrVII	920575	921788	1	723.6	918.17	1.13871e-07	1.3			YKR031C	SPO14	protein_coding	chrXI	501344	506395	-1	30.75	19.51	0.000353748	1.6
YGR254W	ENO1	protein_coding	chrVII	1000927	1002240	1	1215.03	1580.45	1.9984e-15	1.3			YDR324C	UTP4	protein_coding	chrIV	1114433	1116763	-1	73.06	46.35	0.000183881	1.6
													YCL059C	KRR1	protein_coding	chrIII	22429	23379	-1	176.99	111.63	0.000169399	1.6
													YLR045C	STU2	protein_coding	chrXII	235037	237703	-1	33.24	20.61	0.00486494	1.6
													YLR228C	ECM22	protein_coding	chrXII	600019	602463	-1	36.25	22.1	0.00367588	1.6
													YLR247C	IRC20	protein_coding	chrXII	628684	633354	-1	30.49	19.07	0.000443306	1.6
													YLR401C	DUS3	protein_coding	chrXII	922442	924448	-1	48.63	30.22	0.00324614	1.6
													YER082C	UTP7	protein_coding	chrV	324272	325936	-1	77.17	48.96	0.00115992	1.6
													YER151C	UBP3	protein_coding	chrV	469686	472424	-1	56.36	34.95	0.000201774	1.6
													YBL061C	SKT5	protein_coding	chrII	105316	107406	-1	45.73	29.01	0.00507228	1.6
													YBR067C	TIP1	protein_coding	chrII	372103	372735	-1	1244.58	777.14	1.11022e-16	1.6
													YBR248C	HIS7	protein_coding	chrII	714807	716465	-1	53.43	32.57	0.00367588	1.6
													YPL128C	TBF1	protein_coding	chrXVI	306533	308221	-1	77.84	49.95	0.00130797	1.6
													YPL127C	HHO1	protein_coding	chrXVI	308828	309604	-1	132.03	80.51	0.00179602	1.6
													YOL060C	MAM3	protein_coding	chrXV	214017	216137	-1	57.76	36.64	0.00151336	1.6
													YOL041C	NOP12	protein_coding	chrXV	251267	252646	-1	127.75	80.36	0.000109924	1.6
													YAL040C	CLN3	protein_coding	chrI	65778	67520	-1	135.43	85.38	8.30922e-06	1.6
													YIL130W	ASG1	protein_coding	chrIX	102782	105676	1	48.16	30.45	0.000655448	1.6
													YIL126W	STH1	protein_coding	chrIX	117992	122071	1	68.6	42.98	9.10368e-07	1.6
													YDL240W	LRG1	protein_coding	chrIV	22823	25876	1	40.44	25.76	0.00157651	1.6
													YDL051W	LHP1	protein_coding	chrIV	363952	364779	1	259.82	160.26	9.41431e-06	1.6
													YDR189W	SLY1	protein_coding	chrIV	838392	840392	1	92.08	56.37	3.23956e-05	1.6
													YDR301W	CFT1	protein_coding	chrIV	1063352	1067425	1	28.36	18.15	0.00245063	1.6
													YCL054W	SPB1	protein_coding	chrIII	31449	33974	1	84.77	54.03	3.23491e-05	1.6
													YJR001W	AVT1	protein_coding	chrX	436802	438610	1	83.14	51.87	0.000286369	1.6
													YJR092W	BUD4	protein_coding	chrX	598735	603078	1	33.25	21.16	0.000623384	1.6
													YJR148W	BAT2	protein_coding	chrX	705744	706874	1	208.71	132.41	1.06659e-05	1.6
													YLL043W	FPS1	protein_coding	chrXII	49938	51947	1	71.85	46.21	0.000800207	1.6
													YHR071W	PCL5	protein_coding	chrVIII	237004	237693	1	127.02	79.67	0.00610534	1.6
													YHR146W	CRP1	protein_coding	chrVIII	390300	391697	1	104.73	65.77	0.000405891	1.6
													YER068W	MOT2	protein_coding	chrV	293050	294813	1	80.18	49.97	0.000424254	1.6
													YNL103W	MET4	protein_coding	chrXIV	427735	429753	1	44.89	28.17	0.00532911	1.6
													YPL101W	ELP4	protein_coding	chrXVI	360209	361579	1	70.47	43.55	0.00309846	1.6
													YPL022W	RAD1	protein_coding	chrXVI	506697	509999	1	26.54	16.64	0.00610534	1.6
													YPR169W	JIP5	protein_coding	chrXVI	878690	880168	1	80.81	51.91	0.00222963	1.6
													YGL071W	AFT1	protein_coding	chrVII	372012	374084	1	54.29	33.83	0.00166291	1.6
													YDR006C	SOK1	protein_coding	chrIV	458542	461247	-1	72.51	48.69	0.000360302	1.5
													YDR310C	SUM1	protein_coding	chrIV	1081128	1084316	-1	43.72	29.72	0.00345075	1.5
													YCL011C	GBP2	protein_coding	chrIII	102075	103358	-1	107.82	73.08	0.00335178	1.5
													YJL158C	CIS3	protein_coding	chrX	122265	122948	-1	726.6	469.76	7.48934e-10	1.5
													YJL020C	BBC1	protein_coding	chrX	398937	402410	-1	71.96	47.2	2.26199e-05	1.5
													YLR034C	SMF3	protein_coding	chrXII	210512	211933	-1	133.78	91.32	0.000718054	1.5
													YHL040C	ARN1	protein_coding	chrVIII	19088	20971	-1	71.9	47.79	0.00243845	1.5
													YHR082C	KSP1	protein_coding	chrVIII	268459	271548	-1	116.04	75.15	1.89244e-07	1.5
													YHR135C	YCK1	protein_coding	chrVIII	372694	374310	-1	69.6	46.31	0.00582144	1.5
													YFR037C	RSC8	protein_coding	chrVI	227513	229186	-1	71.4	48.13	0.00577915	1.5
													YBL007C	SLA1	protein_coding	chrII	212632	216366	-1	177.86	122.32	5.29414e-10	1.5
													YNL197C	WHI3	protein_coding	chrXIV	267608	269593	-1	118.86	79.23	6.96743e-05	1.5
													YNL121C	TOM70	protein_coding	chrXIV	398684	400537	-1	175.67	117.58	3.67723e-06	1.5
													YMR171C	EAR1	protein_coding	chrXIII	603868	605520	-1	82.55	55.62	0.00315763	1.5
													YPL217C	BMS1	protein_coding	chrXVI	139620	143171	-1	46.83	30.42	0.000421589	1.5
													YAL036C	RBG1	protein_coding	chrI	75043	76152	-1	113.06	74.29	0.00278152	1.5
													YGL038C	OCH1	protein_coding	chrVII	425362	426804	-1	124.93	84.08	0.000668342	1.5
													YGR119C	NUP57	protein_coding	chrVII	728046	729671	-1	64.93	42.55	0.00580877	1.5
													YGR245C	SDA1	protein_coding	chrVII	979765	982068	-1	93.81	60.89	5.6522e-05	1.5
													YKL101W	HSL1	protein_coding	chrXI	248920	253476	1	51.8	34.74	8.68117e-05	1.5
													YKL051W	SFK1	protein_coding	chrXI	341312	342373	1	122.86	82.11	0.00328502	1.5
													YKL009W	MRT4	protein_coding	chrXI	426242	426952	1	183.51	122.65	0.00328502	1.5
													YDR168W	CDC37	protein_coding	chrIV	790328	791848	1	98.22	66.68	0.00239365	1.5
													YDR389W	SAC7	protein_coding	chrIV	1252537	1254501	1	80.08	54.02	0.00156848	1.5
													YDR420W	HKR1	protein_coding	chrIV	1306267	1311675	1	33.33	22.78	0.00102876	1.5
													YCR081W	SRB8	protein_coding	chrIII	254371	258654	1	33.25	22.57	0.00302464	1.5
													YJL050W	MTR4	protein_coding	chrX	342522	345743	1	107.26	71.48	1.47401e-06	1.5
													YLR196W	PWP1	protein_coding	chrXII	543968	545698	1	159.38	102.94	4.32501e-06	1.5
													YLR335W	NUP2	protein_coding	chrXII	797430	799592	1	105.91	70.55	8.7305e-05	1.5
													YLR375W	STP3	protein_coding	chrXII	871697	872728	1	138.97	90.93	0.00125279	1.5
													YLR390W-A	CCW14	protein_coding	chrXII	903724	904440	1	836.23	568.44	1.3257e-09	1.5
													YHR023W	MYO1	protein_coding	chrVIII	151666	157452	1	42.34	28.83	0.000112504	1.5
													YHR206W	SKN7	protein_coding	chrVIII	512732	514600	1	125.76	81.14	2.13096e-05	1.5
													YFR052W	RPN12	protein_coding	chrVI	252505	253329	1	231.79	153.95	0.000308431	1.5
													YBR005W	RCR1	protein_coding	chrII	245906	246547	1	212.54	140.26	0.00199796	1.5
													YNL172W	APC1	protein_coding	chrXIV	310636	315882	1	19.74	12.83	0.00539914	1.5
													YNL145W	MFA2	protein_coding	chrXIV	352414	352530	1	1694.01	1134.16	0.000307117	1.5
													YPL232W	SSO1	protein_coding	chrXVI	107275	108147	1	135.76	90.12	0.00444904	1.5
													YOL051W	GAL11	protein_coding	chrXV	234940	238185	1	50.01	34.16	0.00181119	1.5
													YOR206W	NOC2	protein_coding	chrXV	727512	729644	1	184.44	121.76	1.57261e-07	1.5
													YGL228W	SHE10	protein_coding	chrVII	67598	69331	1	106.84	73.25	0.00095477	1.5
													YGL215W	CLG1	protein_coding	chrVII	87981	89339	1	185.42	127.63	0.000135617	1.5
													YGR014W	MSB2	protein_coding	chrVII	516943	520863	1	170.44	115.55	1.17665e-10	1.5
													YKL020C	SPT23	protein_coding	chrXI	398832	402080	-1	62.23	43.76	0.00119024	1.4
													YDL140C	RPO21	protein_coding	chrIV	205360	210561	-1	220.37	154.88	1.07692e-14	1.4
													YDR190C	RVB1	protein_coding	chrIV	840604	841995	-1	100.17	70.13	0.00649378	1.4
													YCL037C	SRO9	protein_coding	chrIII	57374	58678	-1	228.2	159.79	6.99077e-05	1.4
													YCR030C	SYP1	protein_coding	chrIII	173826	176438	-1	63.65	45.71	0.00542061	1.4
													YJL212C	OPT1	protein_coding	chrX	33850	36249	-1	105.41	76.62	0.000921041	1.4
													YJL192C	SOP4	protein_coding	chrX	72710	73414	-1	235.93	165.37	0.00303375	1.4
													YJL080C	SCP160	protein_coding	chrX	285558	289226	-1	321.41	228.37	2.57572e-14	1.4
													YJR045C	SSC1	protein_coding	chrX	519638	521602	-1	704.03	517.57	6.60583e-14	1.4
													YLL018C	DPS1	protein_coding	chrXII	109902	111575	-1	343.3	250.27	7.34532e-07	1.4
													YLR087C	CSF1	protein_coding	chrXII	306855	315731	-1	31.86	22.74	0.000227752	1.4
													YHR165C	PRP8	protein_coding	chrVIII	429707	436948	-1	62.3	44.89	5.75246e-06	1.4
													YER122C	GLO3	protein_coding	chrV	402871	404352	-1	106.18	73.55	0.00297646	1.4
													YBR036C	CSG2	protein_coding	chrII	309081	310313	-1	247.18	176.04	0.000118747	1.4
													YNL255C	GIS2	protein_coding	chrXIV	167329	167790	-1	825.67	601.12	5.1199e-05	1.4
													YNL154C	YCK2	protein_coding	chrXIV	343636	345276	-1	135.35	97.61	0.00150264	1.4
													YNL031C	HHT2	protein_coding	chrXIV	575640	576050	-1	1892.6	1362.95	2.44764e-09	1.4
													YNL007C	SIS1	protein_coding	chrXIV	618507	619565	-1	177.75	127.09	0.00276537	1.4
													YNL002C	RLP7	protein_coding	chrXIV	626174	627142	-1	171.65	124.23	0.0065241	1.4
													YML115C	VAN1	protein_coding	chrXIII	40187	41794	-1	94.15	65.43	0.0038589	1.4
													YMR016C	SOK2	protein_coding	chrXIII	303236	305593	-1	58.71	41	0.00633675	1.4
													YMR047C	NUP116	protein_coding	chrXIII	363364	366705	-1	56.92	40.56	0.00238842	1.4
													YMR212C	EFR3	protein_coding	chrXIII	690695	693043	-1	102.61	71.82	0.000342793	1.4
													YPL256C	CLN2	protein_coding	chrXVI	64977	66614	-1	113.1	78.12	0.00117515	1.4
													YPL032C	SVL3	protein_coding	chrXVI	488887	491364	-1	169.21	123.93	3.00758e-05	1.4
													YOL077C	BRX1	protein_coding	chrXV	185848	186723	-1	234.21	169.87	0.0026771	1.4
													YOR048C	RAT1	protein_coding	chrXV	418630	421650	-1	67.59	49.89	0.00444239	1.4
													YOR098C	NUP1	protein_coding	chrXV	507948	511178	-1	86.93	61.31	0.000150251	1.4
													YOR323C	PRO2	protein_coding	chrXV	921535	922905	-1	172.9	123.06	0.000674071	1.4
													YGR189C	CRH1	protein_coding	chrVII	876669	878192	-1	433.94	309.1	1.45488e-08	1.4
													YKL156W	RPS27A	protein_coding	chrXI	158613	159212	1	682.25	494.45	2.13484e-05	1.4
													YKR028W	SAP190	protein_coding	chrXI	494257	497358	1	56.83	41.25	0.00548266	1.4
													YDR232W	HEM1	protein_coding	chrIV	927452	929098	1	345.9	249.76	4.04354e-07	1.4
													YDR432W	NPL3	protein_coding	chrIV	1328783	1330027	1	475.99	330.41	9.84469e-09	1.4
													YJL174W	KRE9	protein_coding	chrX	95092	95922	1	251.69	179.07	0.0013893	1.4
													YJL111W	CCT7	protein_coding	chrX	207877	209529	1	112.67	81.42	0.00384635	1.4
													YJR066W	TOR1	protein_coding	chrX	559416	566828	1	45.28	32.73	0.0001061	1.4
													YLR248W	RCK2	protein_coding	chrXII	634252	636084	1	99.43	70.84	0.00294466	1.4
													YLR330W	CHS5	protein_coding	chrXII	787664	789679	1	79.54	56.42	0.00477291	1.4
													YHR208W	BAT1	protein_coding	chrVIII	517532	518713	1	677.47	478.73	1.90174e-10	1.4
													YFL036W	RPO41	protein_coding	chrVI	58782	62837	1	56.23	41.6	0.00281665	1.4
													YER006W	NUG1	protein_coding	chrV	162723	164285	1	198.81	138.26	3.58643e-05	1.4
													YBL024W	NCL1	protein_coding	chrII	172534	174588	1	218.1	151.28	5.88602e-07	1.4
													YNL321W	VNX1	protein_coding	chrXIV	34696	37422	1	67.93	48.66	0.00313499	1.4
													YNL192W	CHS1	protein_coding	chrXIV	276502	279897	1	119.66	88.2	5.5601e-05	1.4
													YNL091W	NST1	protein_coding	chrXIV	452408	456130	1	54.57	38.44	0.00121774	1.4
													YMR128W	ECM16	protein_coding	chrXIII	523696	527499	1	57.34	42.11	0.00283074	1.4
													YPL235W	RVB2	protein_coding	chrXVI	103232	104647	1	118.87	84.34	0.00386506	1.4
													YPL226W	NEW1	protein_coding	chrXVI	121767	125357	1	374.43	266.59	5.55111e-16	1.4
													YPR183W	DPM1	protein_coding	chrXVI	900755	901558	1	386.5	269.97	4.35931e-05	1.4
													YOR232W	MGE1	protein_coding	chrXV	774573	775259	1	265.3	189.02	0.00294466	1.4
													YOR247W	SRL1	protein_coding	chrXV	797676	798308	1	849.65	616.92	1.25778e-06	1.4
													YGR116W	SPT6	protein_coding	chrVII	720409	724764	1	168.05	122.29	1.923e-08	1.4
													YGR204W	ADE3	protein_coding	chrVII	905934	908774	1	358.99	260.23	2.01664e-11	1.4
													YKL209C	STE6	protein_coding	chrXI	42423	46295	-1	107.24	85.17	0.0016982	1.3
													YDL040C	NAT1	protein_coding	chrIV	378874	381438	-1	135.13	104.95	0.00176659	1.3
													YDR170C	SEC7	protein_coding	chrIV	796193	802222	-1	142.21	113.02	6.86614e-06	1.3
													YCL050C	APA1	protein_coding	chrIII	37836	38801	-1	268.07	208.01	0.0066991	1.3
													YJR016C	ILV3	protein_coding	chrX	464451	466208	-1	1110.42	823.83	5.55111e-17	1.3
													YJR091C	JSN1	protein_coding	chrX	595061	598336	-1	107.32	80.43	0.000371146	1.3
													YLR106C	MDN1	protein_coding	chrXII	349006	363738	-1	88.22	69.48	9.41044e-09	1.3
													YLR305C	STT4	protein_coding	chrXII	738161	743863	-1	100.42	76.29	1.38931e-05	1.3
													YFR051C	RET2	protein_coding	chrVI	250163	251803	-1	169.33	127.07	0.00162192	1.3
													YBL022C	PIM1	protein_coding	chrII	177874	181275	-1	96.9	73.27	0.000811966	1.3
													YBR009C	HHF1	protein_coding	chrII	255373	255684	-1	1270.51	987.33	0.000848203	1.3
													YBR023C	CHS3	protein_coding	chrII	284428	287925	-1	98.23	78.31	0.00494183	1.3
													YBR115C	LYS2	protein_coding	chrII	469748	473926	-1	99.38	74.17	8.77912e-05	1.3
													YBR162C	TOS1	protein_coding	chrII	563203	564570	-1	630.49	503.71	1.01797e-05	1.3
													YNL283C	WSC2	protein_coding	chrXIV	105184	106695	-1	170.61	130.39	0.00427663	1.3
													YNL096C	RPS7B	protein_coding	chrXIV	443398	444315	-1	254.96	195.14	0.00677418	1.3
													YMR229C	RRP5	protein_coding	chrXIII	725934	731123	-1	298.03	223.17	7.04992e-14	1.3
													YPL082C	MOT1	protein_coding	chrXVI	398480	404083	-1	57.76	45.16	0.00320475	1.3
													YPR181C	SEC23	protein_coding	chrXVI	897361	899667	-1	542.67	410.03	6.05906e-11	1.3
													YOR151C	RPB2	protein_coding	chrXV	612997	616671	-1	155.29	124.06	0.000329643	1.3
													YOR198C	BFR1	protein_coding	chrXV	718653	720065	-1	212.17	163	0.00249425	1.3
													YOR298C-A	MBF1	protein_coding	chrXV	877230	877685	-1	777.56	602.79	0.00145295	1.3
													YAL021C	CCR4	protein_coding	chrI	110846	113359	-1	135.89	105.19	0.00167756	1.3
													YGR279C	SCW4	protein_coding	chrVII	1048798	1049958	-1	1301.38	1018.86	2.38503e-10	1.3
													YGR285C	ZUO1	protein_coding	chrVII	1061852	1063153	-1	732.07	585.3	3.75096e-06	1.3
													YKR093W	PTR2	protein_coding	chrXI	615730	617535	1	433.47	322.77	5.88837e-08	1.3
													YKR095W	MLP1	protein_coding	chrXI	619805	625432	1	46.9	35.2	0.0021408	1.3
													YIL123W	SIM1	protein_coding	chrIX	128151	129581	1	327.12	246.4	5.30997e-05	1.3
													YIL076W	SEC28	protein_coding	chrIX	216658	217548	1	223.56	167.02	0.00678604	1.3
													YDL195W	SEC31	protein_coding	chrIV	107208	111029	1	240.79	178.56	2.605e-09	1.3
													YDL112W	TRM3	protein_coding	chrIV	258915	263225	1	82.02	61.56	0.000381623	1.3
													YDR060W	MAK21	protein_coding	chrIV	570649	573726	1	150.79	120.4	0.00117665	1.3
													YDR119W	VBA4	protein_coding	chrIV	688227	690533	1	148.51	114.22	0.00127706	1.3
													YDR150W	NUM1	protein_coding	chrIV	755628	763874	1	48.91	37.93	0.000691834	1.3
													YJL042W	MHP1	protein_coding	chrX	361249	365445	1	52.68	39.3	0.00415463	1.3
													YLR429W	CRN1	protein_coding	chrXII	990777	992732	1	137.99	102.25	0.0012258	1.3
													YLR450W	HMG2	protein_coding	chrXII	1032627	1035764	1	90.14	70.68	0.00643889	1.3
													YHR042W	NCP1	protein_coding	chrVIII	190543	192618	1	245.16	195.87	0.000700241	1.3
													YHR108W	GGA2	protein_coding	chrVIII	328303	330060	1	280.44	213.51	6.27352e-05	1.3
													YBR078W	ECM33	protein_coding	chrII	393123	394742	1	1262.19	991.72	3.6493e-13	1.3
													YNL132W	KRE33	protein_coding	chrXIV	375321	378491	1	118.1	92.96	0.00201291	1.3
													YMR109W	MYO5	protein_coding	chrXIII	486587	490246	1	63.68	48.69	0.00669274	1.3
													YOR027W	STI1	protein_coding	chrXV	381053	382822	1	340.43	261.86	1.96037e-05	1.3
													YOR153W	PDR5	protein_coding	chrXV	619840	624375	1	1148.36	867.6	5.55111e-17	1.3
													YOR168W	GLN4	protein_coding	chrXV	649303	651732	1	303.71	228.18	3.1057e-07	1.3
													YOR204W	DED1	protein_coding	chrXV	722911	724725	1	1391.63	1064.29	5.55111e-17	1.3
													YGL225W	VRG4	protein_coding	chrVII	76894	77907	1	232.79	172.93	0.00270468	1.3
													YGR162W	TIF4631	protein_coding	chrVII	824059	826917	1	395.74	302.35	2.09284e-09	1.3

## Sheet: DE genes in fpr3fpr4
List of DE genes in wt vs ∆fpr3∆fpr4
UP - regulated genes													DN - regulated genes
systematic name	standard name	orf type	chr	start	end	strand	wt_S27	fpr3-KAN-fpr3-NAT_S30	pv	FC			systematic name	standard name	orf type	chr	start	end	strand	wt_S27	fpr3-KAN-fpr3-NAT_S30	pv	FC
YAR071W	PHO11	protein_coding	chrI	225460	226863	1	0.71	24.1	2.45786e-08	34			YLR449W	FPR4	protein_coding	chrXII	1030834	1032012	1	198.52	0.93	5.55111e-17	214.4
YGR138C	TPO2	protein_coding	chrVII	763762	765606	-1	2.7	55.02	5.55111e-17	20.4			YML074C	FPR3	protein_coding	chrXIII	120089	121324	-1	170.83	0.88	5.55111e-17	193.4
YPR157W	TDA6	protein_coding	chrXVI	841266	842669	1	2.84	31.87	4.821e-09	11.2			YMR055C	BUB2	protein_coding	chrXIII	386101	387021	-1	27.04	1.19	2.86577e-06	22.8
YCR021C	HSP30	protein_coding	chrIII	156109	157107	-1	21.93	194.48	5.55111e-17	8.9			YDR022C	ATG31	protein_coding	chrIV	488072	488662	-1	25.28	1.85	0.000526992	13.7
YBR054W	YRO2	protein_coding	chrII	343101	344135	1	17.32	140.26	5.55111e-17	8.1			YDR532C	KRE28	protein_coding	chrIV	1499396	1500553	-1	17.2	1.89	0.000155706	9.1
YML011C	RAD33	protein_coding	chrXIII	246895	247428	-1	5.6	44.97	4.99328e-05	8			YLL062C	MHT1	protein_coding	chrXII	16639	17613	-1	17.37	2.24	0.000720268	7.8
YHR136C	SPL2	protein_coding	chrVIII	374654	375100	-1	33.42	239.3	1.11022e-16	7.2			YJR112W	NNF1	protein_coding	chrX	637030	637635	1	26.3	3.6	0.00119969	7.3
YDL069C	CBS1	protein_coding	chrIV	333121	333810	-1	5.77	37.97	5.05131e-05	6.6			YGL226W	MTC3	protein_coding	chrVII	73340	73711	1	42.84	5.87	0.00119969	7.3
YCL047C	POF1	protein_coding	chrIII	43661	44437	-1	5.13	33.71	5.05131e-05	6.6			YAL015C	NTG1	protein_coding	chrI	126903	128102	-1	25.73	3.64	7.5803e-06	7.1
YJL023C	PET130	protein_coding	chrX	397355	398398	-1	2.86	18.82	0.000447755	6.6			YML064C	TEM1	protein_coding	chrXIII	145139	145876	-1	25.64	4.44	0.000868329	5.8
YIR024C	INA22	protein_coding	chrIX	402841	403491	-1	4.59	25.15	0.00229125	5.5			YGL175C	SAE2	protein_coding	chrVII	173285	174322	-1	17.27	3.15	0.00141994	5.5
YMR063W	RIM9	protein_coding	chrXIII	397077	397796	1	4.15	21.22	0.00393325	5.1			YLR104W	LCL2	protein_coding	chrXII	346585	346980	1	45.27	8.27	0.00141994	5.5
YOR358W	HAP5	protein_coding	chrXV	1010161	1010889	1	4.1	20.96	0.00393325	5.1			YHL047C	ARN2	protein_coding	chrVIII	8351	10213	-1	53.46	10.55	2.12275e-13	5.1
YBR093C	PHO5	protein_coding	chrII	429548	430951	-1	19.15	93.29	1.11022e-16	4.9			YOR059C	LPL1	protein_coding	chrXV	438906	440258	-1	24.29	4.84	2.63372e-05	5
YMR028W	TAP42	protein_coding	chrXIII	327482	328582	1	7.24	30.73	6.03357e-05	4.2			YHL048W	COS8	protein_coding	chrVIII	6401	7546	1	86.91	18.1	5.68545e-13	4.8
YJL116C	NCA3	protein_coding	chrX	193860	194873	-1	10.8	41.98	1.47384e-05	3.9			YHL009C	YAP3	protein_coding	chrVIII	84068	85060	-1	42.13	9.89	7.9886e-06	4.3
YNL160W	YGP1	protein_coding	chrXIV	336545	337609	1	40.21	152.71	5.55111e-17	3.8			YNL246W	VPS75	protein_coding	chrXIV	185460	186349	1	36.93	8.58	7.05844e-05	4.3
YPR160W	GPH1	protein_coding	chrXVI	861306	864014	1	21.32	81.79	5.55111e-17	3.8			YOR073W	SGO1	protein_coding	chrXV	464771	466543	1	30.9	7.39	3.91972e-07	4.2
YKL027W	TCD2	protein_coding	chrXI	387562	388905	1	14.82	54.41	3.1825e-08	3.7			YDL043C	PRP11	protein_coding	chrIV	375680	376480	-1	21.14	5.45	0.00632826	3.9
YHR001W-A	QCR10	protein_coding	chrVIII	107826	108122	1	16.77	58.8	0.00823415	3.5			YMR214W	SCJ1	protein_coding	chrXIII	695350	696483	1	32.5	8.66	7.27868e-05	3.8
YER037W	PHM8	protein_coding	chrV	225889	226854	1	20.62	71.19	1.98362e-07	3.5			YKL059C	MPE1	protein_coding	chrXI	328118	329443	-1	21.03	5.76	0.000658724	3.6
YGL209W	MIG2	protein_coding	chrVII	95858	97006	1	24.27	84.55	5.28155e-10	3.5			YLR405W	DUS4	protein_coding	chrXII	929789	930892	1	42.4	11.86	1.25566e-05	3.6
YJL142C	IRC9	protein_coding	chrX	147819	148211	-1	15.21	49.99	0.00676526	3.3			YPR062W	FCY1	protein_coding	chrXVI	677165	677641	1	75.17	20.59	0.000112336	3.6
YLL049W	LDB18	protein_coding	chrXII	40666	41205	1	14.76	46.49	0.00280755	3.2			YIL087C	AIM19	protein_coding	chrIX	199646	200119	-1	79.85	23.03	0.000109934	3.5
YOR179C	SYC1	protein_coding	chrXV	671845	672411	-1	15.81	48.13	0.00227493	3			YNL159C	ASI2	protein_coding	chrXIV	338478	339347	-1	35.49	10.04	0.000418336	3.5
YHR215W	PHO12	protein_coding	chrVIII	552099	553502	1	30.5	90.96	7.13644e-11	3			YAL020C	ATS1	protein_coding	chrI	113614	114615	-1	22.86	6.54	0.00250747	3.5
YER069W	ARG5,6	protein_coding	chrV	295410	298001	1	11.14	33.27	8.33571e-08	3			YLR091W	GEP5	protein_coding	chrXII	322297	323178	1	25.97	7.43	0.00250747	3.5
YHR092C	HXT4	protein_coding	chrVIII	287081	288811	-1	21.29	61.16	6.88267e-09	2.9			YER011W	TIR1	protein_coding	chrV	175248	176012	1	95.04	27.11	7.01038e-08	3.5
YOL101C	IZH4	protein_coding	chrXV	126982	127920	-1	42.43	124.38	7.01421e-10	2.9			YDL197C	ASF2	protein_coding	chrIV	104917	106494	-1	35.98	11.07	4.7647e-06	3.3
YPL003W	ULA1	protein_coding	chrXVI	552020	553408	1	7.17	20.43	0.00285365	2.8			YHR090C	YNG2	protein_coding	chrVIII	283777	284625	-1	25.81	7.71	0.0038806	3.3
YDR240C	SNU56	protein_coding	chrIV	943674	945152	-1	9.43	25.09	0.00114803	2.7			YGL025C	PGD1	protein_coding	chrVII	448764	449957	-1	33.37	10.06	0.000106079	3.3
YER038C	KRE29	protein_coding	chrV	226858	228252	-1	7.85	21.13	0.00349838	2.7			YPR040W	TIP41	protein_coding	chrXVI	647305	648375	1	43.71	13.25	2.80887e-05	3.3
YHR192W	LNP1	protein_coding	chrVIII	486826	487662	1	16.66	44.34	0.00114803	2.7			YNL151C	RPC31	protein_coding	chrXIV	347766	348521	-1	27.67	8.66	0.00597642	3.2
YIL007C	NAS2	protein_coding	chrIX	342994	343656	-1	15.02	39.51	0.00677232	2.6			YPR005C	HAL1	protein_coding	chrXVI	565787	566671	-1	27.01	8.63	0.00368674	3.1
YJR136C	TTI2	protein_coding	chrX	677441	678706	-1	14.16	36.21	0.000455545	2.6			YLR170C	APS1	protein_coding	chrXII	500579	501049	-1	48.64	16.22	0.0056042	3
YLR363C	NMD4	protein_coding	chrXII	852495	853151	-1	24.26	63.13	0.000723798	2.6			YOR308C	SNU66	protein_coding	chrXV	894624	896387	-1	29.36	9.9	3.52522e-05	3
YHR058C	MED6	protein_coding	chrVIII	218997	219884	-1	13.46	35.65	0.00277159	2.6			YHL019C	APM2	protein_coding	chrVIII	67731	69548	-1	17.53	6	0.00131402	2.9
YML123C	PHO84	protein_coding	chrXIII	24037	25800	-1	484.44	1243.72	5.55111e-17	2.6			YFR034C	PHO4	protein_coding	chrVI	225020	225958	-1	37.12	12.79	0.000814858	2.9
YIL111W	COX5B	protein_coding	chrIX	155222	155765	1	21.97	58.19	0.00277159	2.6			YJL112W	MDV1	protein_coding	chrX	205305	207449	1	20.89	7.12	0.000132906	2.9
YLL012W	YEH1	protein_coding	chrXII	125534	127255	1	13.3	34.23	6.4909e-05	2.6			YMR064W	AEP1	protein_coding	chrXIII	397903	399459	1	32.62	11.22	5.21482e-05	2.9
YNL090W	RHO2	protein_coding	chrXIV	456565	457143	1	24.08	62.21	0.00173623	2.6			YOR113W	AZF1	protein_coding	chrXV	534075	536819	1	38.82	13.52	6.20317e-09	2.9
YPL081W	RPS9A	protein_coding	chrXVI	404950	406044	1	58.21	150.52	2.02037e-11	2.6			YGR104C	SRB5	protein_coding	chrVII	697445	698368	-1	33.41	11.81	0.00195827	2.8
YNL024C-A	KSH1	protein_coding	chrXIV	586602	586820	-1	54.57	134.57	0.00633808	2.5			YNL076W	MKS1	protein_coding	chrXIV	483556	485310	1	33.48	11.82	1.89649e-05	2.8
YDR288W	NSE3	protein_coding	chrIV	1037195	1038106	1	13.1	32.31	0.00633808	2.5			YHR034C	PIH1	protein_coding	chrVIII	176965	177999	-1	23.1	8.44	0.00773673	2.7
YER150W	SPI1	protein_coding	chrV	468370	468816	1	55.7	139.19	6.0861e-05	2.5			YOR074C	CDC21	protein_coding	chrXV	466675	467589	-1	38.1	14.31	0.0016248	2.7
YNL116W	DMA2	protein_coding	chrXIV	408341	409909	1	7.62	18.78	0.00633808	2.5			YPL065W	VPS28	protein_coding	chrXVI	427927	428655	1	36.89	13.48	0.00472943	2.7
YPR031W	NTO1	protein_coding	chrXVI	631515	633761	1	7.98	19.92	0.000679339	2.5			YGR142W	BTN2	protein_coding	chrVII	772454	773686	1	58.97	22.13	5.23573e-06	2.7
YER053C	PIC2	protein_coding	chrV	258737	259639	-1	41.91	99.12	4.42094e-06	2.4			YPL103C	FMP30	protein_coding	chrXVI	358000	359406	-1	26.19	10.08	0.0014668	2.6
YER130C	COM2	protein_coding	chrV	421115	422446	-1	40.38	96.7	2.58436e-08	2.4			YGR009C	SEC9	protein_coding	chrVII	509047	511002	-1	22.91	8.93	0.000508536	2.6
YBR141C	BMT2	protein_coding	chrII	527025	528038	-1	13.75	33.37	0.00390041	2.4			YMR292W	GOT1	protein_coding	chrXIII	854795	855293	1	61.87	24.06	0.00385527	2.6
YPL099C	INA17	protein_coding	chrXVI	363520	364068	-1	23.58	55.67	0.00740549	2.4			YDL028C	MPS1	protein_coding	chrIV	400997	403291	-1	32.55	12.84	8.82179e-06	2.5
YDR057W	YOS9	protein_coding	chrIV	565927	567555	1	8.56	20.77	0.00390041	2.4			YHR199C	AIM46	protein_coding	chrVIII	497490	498422	-1	84.33	33.93	7.11578e-06	2.5
YLL055W	YCT1	protein_coding	chrXII	30109	31704	1	11.23	27.36	0.0010079	2.4			YGR084C	MRP13	protein_coding	chrVII	647123	648142	-1	60.54	24.61	8.02706e-05	2.5
YDR198C	RKM2	protein_coding	chrIV	852533	853972	-1	10.37	24.26	0.00453035	2.3			YMR192W	GYL1	protein_coding	chrXIII	647118	649280	1	25.33	10.09	0.000159775	2.5
YER062C	GPP2	protein_coding	chrV	279930	280682	-1	39.68	89.87	0.000124279	2.3			YPL116W	HOS3	protein_coding	chrXVI	329606	331699	1	42.33	16.68	1.25943e-06	2.5
YBR166C	TYR1	protein_coding	chrII	569842	571200	-1	19.79	44.98	0.000252794	2.3			YGR113W	DAM1	protein_coding	chrVII	718893	719924	1	39.57	15.86	0.00118005	2.5
YPL019C	VTC3	protein_coding	chrXVI	514511	517018	-1	128.27	298.12	5.55111e-17	2.3			YGR197C	SNG1	protein_coding	chrVII	892497	894140	-1	19.39	7.97	0.0049902	2.4
YDL248W	COS7	protein_coding	chrIV	1802	2953	1	16.43	37.9	0.00171358	2.3			YKL183W	LOT5	protein_coding	chrXI	98721	99641	1	55.15	22.52	0.000365171	2.4
YFR022W	ROG3	protein_coding	chrVI	196833	199034	1	12.21	28.25	0.000174822	2.3			YDL233W	MFG1	protein_coding	chrIV	36797	38173	1	20.98	8.72	0.00812173	2.4
YEL038W	UTR4	protein_coding	chrV	80462	81145	1	24.75	57.45	0.00278179	2.3			YDR128W	MTC5	protein_coding	chrIV	709549	712995	1	33.52	13.93	1.19713e-07	2.4
YPL188W	POS5	protein_coding	chrXVI	191406	192650	1	28	64	2.66926e-05	2.3			YHR216W	IMD2	protein_coding	chrVIII	554396	555967	1	97.57	40.27	8.41841e-10	2.4
YKR100C	SKG1	protein_coding	chrXI	638901	639968	-1	19.58	43.95	0.00153558	2.2			YBR155W	CNS1	protein_coding	chrII	549771	550928	1	29.24	12.25	0.00442185	2.4
YJR109C	CPA2	protein_coding	chrX	629585	632941	-1	63.19	137.54	5.55111e-17	2.2			YNL289W	PCL1	protein_coding	chrXIV	87897	88736	1	55.73	23.39	0.000832251	2.4
YER057C	HMF1	protein_coding	chrV	270737	271126	-1	104.71	235.09	9.42093e-06	2.2			YNL042W	BOP3	protein_coding	chrXIV	548100	549290	1	33.45	13.75	0.00169487	2.4
YMR157C	AIM36	protein_coding	chrXIII	571277	572044	-1	24.64	55.43	0.00249462	2.2			YLR183C	TOS4	protein_coding	chrXII	520543	522012	-1	46.07	20.05	9.95265e-05	2.3
YPR156C	TPO3	protein_coding	chrXVI	837909	839777	-1	38.9	85.85	8.2626e-09	2.2			YHR207C	SET5	protein_coding	chrVIII	514905	516485	-1	30.24	13.12	0.00104167	2.3
YGL005C	COG7	protein_coding	chrVII	489708	490547	-1	23.71	51.98	0.00282672	2.2			YBR211C	AME1	protein_coding	chrII	646158	647132	-1	49.03	21.27	0.00104167	2.3
YOL058W	ARG1	protein_coding	chrXV	219211	220473	1	22.87	50.99	0.000226189	2.2			YIL144W	NDC80	protein_coding	chrIX	78074	80149	1	24.47	10.52	0.000652553	2.3
YGR004W	PEX31	protein_coding	chrVII	502938	504326	1	15.06	33.79	0.00153558	2.2			YDR147W	EKI1	protein_coding	chrIV	751631	753235	1	26.68	11.56	0.00188977	2.3
YHR147C	MRPL6	protein_coding	chrVIII	392639	393283	-1	43.24	89.69	0.00117329	2.1			YLR260W	LCB5	protein_coding	chrXII	665844	667907	1	27.02	11.63	0.000362191	2.3
YER055C	HIS1	protein_coding	chrV	264892	265785	-1	367.64	775.29	5.55111e-17	2.1			YHR088W	RPF1	protein_coding	chrVIII	281495	282382	1	72.9	31.96	0.00015747	2.3
YBR296C	PHO89	protein_coding	chrII	796798	798522	-1	33.49	70.24	2.00618e-06	2.1			YBR005W	RCR1	protein_coding	chrII	245906	246547	1	212.54	91.81	2.67989e-08	2.3
YHR162W	MPC2	protein_coding	chrVIII	423072	423461	1	188.98	394.62	9.74389e-08	2.1			YMR199W	CLN1	protein_coding	chrXIII	662644	664284	1	79.51	34.59	6.55192e-08	2.3
YOR107W	RGS2	protein_coding	chrXV	521353	522282	1	20.35	43.43	0.0051913	2.1			YJL187C	SWE1	protein_coding	chrX	76803	79262	-1	28.75	13.31	0.00018116	2.2
YOR222W	ODC2	protein_coding	chrXV	758330	759253	1	39.88	83.87	0.000137812	2.1			YJL020C	BBC1	protein_coding	chrX	398937	402410	-1	71.96	32.36	4.24771e-13	2.2
YGL180W	ATG1	protein_coding	chrVII	160065	162758	1	12.2	25.93	0.000252087	2.1			YLR442C	SIR3	protein_coding	chrXII	1019315	1022251	-1	21.03	9.66	0.000422668	2.2
YDR019C	GCV1	protein_coding	chrIV	484163	485365	-1	39.74	80.75	3.95889e-05	2			YHR115C	DMA1	protein_coding	chrVIII	340109	341359	-1	73.25	34.03	2.16045e-05	2.2
YFR053C	HXK1	protein_coding	chrVI	253592	255049	-1	127.06	259.03	4.44089e-16	2			YMR078C	CTF18	protein_coding	chrXIII	422503	424728	-1	21.48	9.81	0.00179571	2.2
YAL044C	GCV3	protein_coding	chrI	57950	58462	-1	100.96	206.39	1.56111e-05	2			YOR383C	FIT3	protein_coding	chrXV	1060441	1061055	-1	344.95	154.41	1.99343e-11	2.2
YGL179C	TOS3	protein_coding	chrVII	163409	165091	-1	12.43	25.29	0.00641953	2			YKL043W	PHD1	protein_coding	chrXI	356748	357848	1	76.89	34.7	2.62855e-05	2.2
YNL275W	BOR1	protein_coding	chrXIV	119268	120998	1	16.69	34.05	0.00129658	2			YDL240W	LRG1	protein_coding	chrIV	22823	25876	1	40.44	18.23	3.72022e-07	2.2
YNL100W	MIC27	protein_coding	chrXIV	437613	438317	1	38.14	75.86	0.00293138	2			YDR406W	PDR15	protein_coding	chrIV	1279210	1283799	1	27.12	12.37	4.50467e-07	2.2
YPL219W	PCL8	protein_coding	chrXVI	136750	138228	1	16.16	31.73	0.00606138	2			YNL278W	CAF120	protein_coding	chrXIV	113271	116453	1	29.73	13.72	1.38489e-05	2.2
YOR154W	SLP1	protein_coding	chrXV	624729	626492	1	14.12	28.46	0.00340125	2			YNR034W	SOL1	protein_coding	chrXIV	690321	691286	1	40.21	18.08	0.00427013	2.2
YBR230C	OM14	protein_coding	chrII	679549	680050	-1	75.39	141.33	0.00145859	1.9			YPR079W	MRL1	protein_coding	chrXVI	698869	700014	1	31.29	14.29	0.00685493	2.2
YMR105C	PGM2	protein_coding	chrXIII	475897	477606	-1	28.54	54.26	0.00021004	1.9			YGR040W	KSS1	protein_coding	chrVII	575398	576504	1	71.08	32.54	6.46316e-05	2.2
YMR145C	NDE1	protein_coding	chrXIII	554793	556475	-1	227.25	442.31	5.55111e-17	1.9			YGR140W	CBF2	protein_coding	chrVII	767429	770299	1	20.47	9.12	0.00039471	2.2
YPL227C	ALG5	protein_coding	chrXVI	120163	121167	-1	37.66	70.59	0.00145859	1.9			YKL032C	IXR1	protein_coding	chrXI	380065	381858	-1	57.74	27.38	9.84555e-06	2.1
YOR079C	ATX2	protein_coding	chrXV	473475	474416	-1	31.72	59.09	0.00516895	1.9			YIL127C	RRT14	protein_coding	chrIX	117024	117644	-1	62.55	29.88	0.00723693	2.1
YKL058W	TOA2	protein_coding	chrXI	330166	330534	1	83.67	156.77	0.00407695	1.9			YIR038C	GTT1	protein_coding	chrIX	423809	424513	-1	69.22	32.51	0.00217643	2.1
YIL049W	DFG10	protein_coding	chrIX	260158	260919	1	32.68	63.03	0.00660535	1.9			YDL234C	GYP7	protein_coding	chrIV	34237	36477	-1	79.11	37.02	4.49959e-09	2.1
YER072W	VTC1	protein_coding	chrV	302806	303195	1	462.24	878.8	1.04261e-12	1.9			YDL106C	PHO2	protein_coding	chrIV	270222	271901	-1	29.05	13.64	0.00217643	2.1
YOL137W	BSC6	protein_coding	chrXV	65621	67114	1	18	33.61	0.00773551	1.9			YDR169C	STB3	protein_coding	chrIV	792348	793889	-1	37.46	17.7	0.000917577	2.1
YOR359W	VTS1	protein_coding	chrXV	1011189	1012760	1	35.48	68.74	4.18959e-05	1.9			YLR309C	IMH1	protein_coding	chrXII	749034	751769	-1	17.47	8.38	0.00299957	2.1
YGR134W	CAF130	protein_coding	chrVII	757770	761138	1	12.12	23	0.000724431	1.9			YLR314C	CDC3	protein_coding	chrXII	762575	764137	-1	60.54	28.63	2.27039e-05	2.1
YDL048C	STP4	protein_coding	chrIV	366739	368211	-1	95.34	170.43	2.05774e-08	1.8			YBL091C	MAP2	protein_coding	chrII	47363	48628	-1	125.87	58.63	2.31189e-08	2.1
YGR044C	RME1	protein_coding	chrVII	582990	583892	-1	61.77	110	0.000452503	1.8			YBR002C	RER2	protein_coding	chrII	241708	242568	-1	52.05	25.35	0.00473858	2.1
YGR216C	GPI1	protein_coding	chrVII	922633	924462	-1	23.4	41.16	0.00272	1.8			YMR197C	VTI1	protein_coding	chrXIII	658545	659198	-1	80.71	38.39	0.00165594	2.1
YDR322W	MRPL35	protein_coding	chrIV	1110589	1111692	1	32.48	59.32	0.00315249	1.8			YPR025C	CCL1	protein_coding	chrXVI	613377	614558	-1	40.45	19.39	0.00299957	2.1
YJL189W	RPL39	protein_coding	chrX	75933	76474	1	145.17	257.77	3.44303e-05	1.8			YOR144C	ELG1	protein_coding	chrXV	602717	605092	-1	20.12	9.65	0.00299957	2.1
YJL117W	PHO86	protein_coding	chrX	192531	193466	1	119.18	208.74	1.59326e-06	1.8			YGR221C	TOS2	protein_coding	chrVII	937124	938992	-1	20.78	9.93	0.00723693	2.1
YER067W	RGI1	protein_coding	chrV	292066	292551	1	139.35	249.29	9.65094e-05	1.8			YIL112W	HOS4	protein_coding	chrIX	151595	154846	1	18.68	9.06	0.0009556	2.1
YML022W	APT1	protein_coding	chrXIII	228937	229500	1	301.97	539.95	6.5091e-10	1.8			YIL010W	DOT5	protein_coding	chrIX	334882	335529	1	64.55	30.32	0.00454437	2.1
YMR072W	ABF2	protein_coding	chrXIII	411569	412120	1	238.17	427.11	4.79977e-08	1.8			YDL189W	RBS1	protein_coding	chrIV	122216	123589	1	34.79	16.68	0.00299957	2.1
YMR189W	GCV2	protein_coding	chrXIII	637500	640604	1	87.89	158.54	1.77636e-15	1.8			YDR244W	PEX5	protein_coding	chrIV	950563	952401	1	34.66	16.62	0.000610515	2.1
YPL149W	ATG5	protein_coding	chrXVI	271310	272194	1	42.77	76.47	0.00358962	1.8			YDR356W	SPC110	protein_coding	chrIV	1186107	1188941	1	27.05	13.09	0.000198303	2.1
YPR132W	RPS23B	protein_coding	chrXVI	794965	795767	1	246.82	439.05	4.20289e-11	1.8			YJL062W-A	COA3	protein_coding	chrX	316723	316980	1	216.18	101.54	0.00105042	2.1
YOL042W	NGL1	protein_coding	chrXV	249825	250916	1	32.83	57.97	0.00569322	1.8			YBR160W	CDC28	protein_coding	chrII	560078	560974	1	59.96	29.2	0.00197576	2.1
YOR092W	ECM3	protein_coding	chrXV	495127	496968	1	51.91	94.81	1.42587e-06	1.8			YOR043W	WHI2	protein_coding	chrXV	410870	412330	1	73.62	35.11	7.56278e-06	2.1
YGL055W	OLE1	protein_coding	chrVII	398628	400160	1	999.23	1784.29	5.55111e-17	1.8			YGR046W	TAM41	protein_coding	chrVII	584895	586052	1	48.16	22.62	0.00105042	2.1
YKL040C	NFU1	protein_coding	chrXI	361058	361828	-1	60.71	104.76	0.00256519	1.7			YJR043C	POL32	protein_coding	chrX	516461	517513	-1	46.35	22.8	0.00357143	2
YDL133C-A	RPL41B	protein_coding	chrIV	221724	221801	-1	1302.43	2238.99	1.04146e-05	1.7			YER161C	SPT2	protein_coding	chrV	499347	500348	-1	43.74	21.79	0.0064817	2
YJL196C	ELO1	protein_coding	chrX	67850	68782	-1	124.9	212.92	3.49081e-06	1.7			YBL052C	SAS3	protein_coding	chrII	119379	121874	-1	23.94	11.81	0.00130022	2
YLL039C	UBI4	protein_coding	chrXII	64062	65207	-1	49.54	85.72	0.000836733	1.7			YPL250C	ICY2	protein_coding	chrXVI	74309	74719	-1	116.32	58.43	0.00486252	2
YLR093C	NYV1	protein_coding	chrXII	326513	327415	-1	56.25	95.49	0.00239679	1.7			YGL023C	PIB2	protein_coding	chrVII	450197	452104	-1	30.8	15.45	0.0017618	2
YHR039C-A	VMA10	protein_coding	chrVIII	187173	187679	-1	121.8	208.83	0.00063022	1.7			YGR161C	RTS3	protein_coding	chrVII	808629	809420	-1	83	41.34	0.000855452	2
YHR069C	RRP4	protein_coding	chrVIII	233579	234658	-1	42.42	70.75	0.00551558	1.7			YDL127W	PCL2	protein_coding	chrIV	234927	235853	1	47.27	23.55	0.0064817	2
YBL087C	RPL23A	protein_coding	chrII	59822	60739	-1	189.87	329.35	4.03753e-09	1.7			YDR335W	MSN5	protein_coding	chrIV	1141168	1144842	1	32.52	16.63	1.31504e-05	2
YNL037C	IDH1	protein_coding	chrXIV	557920	559002	-1	180.25	304.37	3.98009e-09	1.7			YHR102W	KIC1	protein_coding	chrVIII	316572	319814	1	46.37	23.56	8.32691e-07	2
YOL155C	HPF1	protein_coding	chrXV	28703	31606	-1	13.72	23.3	0.00709401	1.7			YFR029W	PTR3	protein_coding	chrVI	210937	212973	1	21.51	10.72	0.0064817	2
YOL105C	WSC3	protein_coding	chrXV	114138	115808	-1	26.23	45.72	0.00287932	1.7			YEL065W	SIT1	protein_coding	chrV	27657	29543	1	165.2	84.45	1.90104e-12	2
YOL064C	MET22	protein_coding	chrXV	206103	207176	-1	66.77	112.81	0.000355529	1.7			YBL058W	SHP1	protein_coding	chrII	111437	112708	1	121.37	60.93	4.10947e-07	2
YOR251C	TUM1	protein_coding	chrXV	802550	803464	-1	62.04	104.98	0.00143742	1.7			YNL067W	RPL9B	protein_coding	chrXIV	499681	500256	1	561.97	288.04	8.54428e-13	2
YGR209C	TRX2	protein_coding	chrVII	912913	913227	-1	328.83	571.74	5.20205e-06	1.7			YMR086W	SEG1	protein_coding	chrXIII	439208	442090	1	44.57	21.96	2.35724e-06	2
YGR235C	MIC26	protein_coding	chrVII	961360	962061	-1	61.01	101.07	0.00818799	1.7			YMR255W	GFD1	protein_coding	chrXIII	778001	778567	1	80.8	40.43	0.00561361	2
YGR286C	BIO2	protein_coding	chrVII	1063813	1064940	-1	38.85	66.77	0.00380765	1.7			YPL198W	RPL7B	protein_coding	chrXVI	173152	174702	1	109.17	54.19	7.74341e-08	2
YDR247W	VHS1	protein_coding	chrIV	956013	957398	1	66.83	116.55	1.45353e-05	1.7			YOR188W	MSB1	protein_coding	chrXV	685767	689180	1	34.13	17.26	1.29843e-05	2
YDR527W	RBA50	protein_coding	chrIV	1491094	1492413	1	40.74	70.29	0.0012351	1.7			YGR108W	CLB1	protein_coding	chrVII	703636	705051	1	40.8	20.81	0.00237708	2
YJL001W	PRE3	protein_coding	chrX	435163	435926	1	139.49	231.45	2.84263e-05	1.7			YDR295C	HDA2	protein_coding	chrIV	1052623	1054647	-1	30.99	16.71	0.00317256	1.9
YLR301W	HRI1	protein_coding	chrXII	730825	731559	1	158.54	264.34	9.70163e-06	1.7			YDR329C	PEX3	protein_coding	chrIV	1126270	1127595	-1	45.82	24.69	0.00366833	1.9
YMR250W	GAD1	protein_coding	chrXIII	770801	772558	1	23.23	39.74	0.00566425	1.7			YDR498C	SEC20	protein_coding	chrIV	1445843	1446994	-1	44.09	22.74	0.00492617	1.9
YPR080W	TEF1	protein_coding	chrXVI	700594	701970	1	1395.96	2333.62	5.55111e-17	1.7			YJL168C	SET2	protein_coding	chrX	102227	104428	-1	34.38	18.34	0.00101258	1.9
YKL116C	PRR1	protein_coding	chrXI	221344	222900	-1	33.26	53.28	0.00708771	1.6			YBR081C	SPT7	protein_coding	chrII	401253	405251	-1	23.41	12.56	0.000282662	1.9
YJL012C	VTC4	protein_coding	chrX	411234	413399	-1	201.4	327.05	6.66134e-16	1.6			YBR129C	OPY1	protein_coding	chrII	494353	495339	-1	60.55	32.07	0.00319472	1.9
YLR286C	CTS1	protein_coding	chrXII	708448	710136	-1	1654.07	2650.89	5.55111e-17	1.6			YNL180C	RHO5	protein_coding	chrXIV	299654	300649	-1	65	33.97	0.00179781	1.9
YER113C	TMN3	protein_coding	chrV	387932	390052	-1	30.52	49.92	0.00158414	1.6			YPL202C	AFT2	protein_coding	chrXVI	168088	169338	-1	50.95	26.18	0.00155043	1.9
YBR105C	VID24	protein_coding	chrII	450881	451969	-1	74.08	120.28	0.000523949	1.6			YOR166C	SWT1	protein_coding	chrXV	647126	648502	-1	39.78	20.61	0.0036886	1.9
YBR256C	RIB5	protein_coding	chrII	727386	728102	-1	73.62	117.22	0.00735625	1.6			YAL014C	SYN8	protein_coding	chrI	128252	129019	-1	76.51	41.22	0.00424306	1.9
YKL173W	SNU114	protein_coding	chrXI	122517	125543	1	21.39	33.9	0.0033279	1.6			YDR325W	YCG1	protein_coding	chrIV	1117126	1120233	1	19.55	10.18	0.0023948	1.9
YKL085W	MDH1	protein_coding	chrXI	279123	280127	1	98.11	153.14	0.000482022	1.6			YCL063W	VAC17	protein_coding	chrIII	17290	18561	1	44.63	24.03	0.00490967	1.9
YKL062W	MSN4	protein_coding	chrXI	323228	325120	1	44.72	72.08	0.000478069	1.6			YJL092W	SRS2	protein_coding	chrX	257423	260947	1	34.47	18.27	2.65602e-05	1.9
YIL103W	DPH1	protein_coding	chrIX	171751	173028	1	42.86	70.03	0.00373735	1.6			YJR103W	URA8	protein_coding	chrX	620754	622490	1	72.82	37.7	1.0073e-05	1.9
YDR033W	MRH1	protein_coding	chrIV	508147	509109	1	1226.61	1994.86	5.55111e-17	1.6			YLL043W	FPS1	protein_coding	chrXII	49938	51947	1	71.85	37.47	2.92942e-06	1.9
YDR055W	PST1	protein_coding	chrIV	563527	564861	1	137.27	224.02	1.22959e-07	1.6			YLR019W	PSR2	protein_coding	chrXII	180288	181481	1	115.11	59.42	3.83456e-06	1.9
YLR258W	GSY2	protein_coding	chrXII	660716	662833	1	66.3	104.62	1.89015e-05	1.6			YER112W	LSM4	protein_coding	chrV	387232	387795	1	134.21	69.67	0.00066251	1.9
YFR030W	MET10	protein_coding	chrVI	213312	216419	1	37.17	57.95	0.000165649	1.6			YNL298W	CLA4	protein_coding	chrXIV	68915	71443	1	36.63	18.99	0.000162042	1.9
YBL068W	PRS4	protein_coding	chrII	92414	93394	1	53.81	85.67	0.00735625	1.6			YOR373W	NUD1	protein_coding	chrXV	1036834	1039389	1	26.89	14.09	0.00135087	1.9
YNL065W	AQR1	protein_coding	chrXIV	503724	505484	1	72.39	118.39	9.33933e-06	1.6			YKR048C	NAP1	protein_coding	chrXI	525387	526640	-1	175.53	100.1	3.34149e-07	1.8
YML019W	OST6	protein_coding	chrXIII	233457	234455	1	80.75	126.74	0.0013723	1.6			YIL026C	IRR1	protein_coding	chrIX	304477	307929	-1	27.4	15.17	0.000477529	1.8
YMR136W	GAT2	protein_coding	chrXIII	541199	542881	1	28.41	46.7	0.00603073	1.6			YIR006C	PAN1	protein_coding	chrIX	365466	369908	-1	95.05	52.33	1.00919e-13	1.8
YMR251W-A	HOR7	protein_coding	chrXIII	774752	774931	1	453.72	703.42	0.00178687	1.6			YDR146C	SWI5	protein_coding	chrIV	748613	750742	-1	40.21	22.04	0.000744377	1.8
YMR312W	ELP6	protein_coding	chrXIII	898405	899226	1	55.74	91.62	0.00718197	1.6			YDR348C	PAL1	protein_coding	chrIV	1170326	1171825	-1	51.13	29.11	0.00252866	1.8
YPL211W	NIP7	protein_coding	chrXVI	153495	154040	1	164.17	259.88	0.000571863	1.6			YJL129C	TRK1	protein_coding	chrX	173599	177306	-1	40.83	22.37	7.33155e-06	1.8
YPR137W	RRP9	protein_coding	chrXVI	802359	804080	1	42.8	68.46	0.00136747	1.6			YJL079C	PRY1	protein_coding	chrX	289875	290774	-1	61.97	33.96	0.00649705	1.8
YGL073W	HSF1	protein_coding	chrVII	368753	371254	1	25.87	40.14	0.00535799	1.6			YLR396C	VPS33	protein_coding	chrXII	910235	912310	-1	28.31	15.77	0.00637245	1.8
YGR023W	MTL1	protein_coding	chrVII	529264	530919	1	35.48	55.37	0.00709731	1.6			YHL023C	NPR3	protein_coding	chrVIII	59123	62563	-1	19.39	10.79	0.00355275	1.8
YDL184C	RPL41A	protein_coding	chrIV	130407	130484	-1	2847.48	4268.07	2.38702e-06	1.5			YER027C	GAL83	protein_coding	chrV	208979	210232	-1	70.69	38.3	0.000492746	1.8
YCR002C	CDC10	protein_coding	chrIII	117380	118348	-1	101.76	155.45	0.000948455	1.5			YER151C	UBP3	protein_coding	chrV	469686	472424	-1	56.36	31.88	1.51695e-05	1.8
YCR009C	RVS161	protein_coding	chrIII	130745	131542	-1	137.29	203.8	0.00125184	1.5			YBL007C	SLA1	protein_coding	chrII	212632	216366	-1	177.86	101.11	5.55111e-17	1.8
YJL078C	PRY3	protein_coding	chrX	291336	293981	-1	48.56	74.66	0.000124401	1.5			YNL020C	ARK1	protein_coding	chrXIV	595623	597539	-1	41.04	22.21	0.00100371	1.8
YLR325C	RPL38	protein_coding	chrXII	781143	781379	-1	1941.53	2864.63	7.93952e-11	1.5			YML059C	NTE1	protein_coding	chrXIII	153219	158258	-1	59.09	33.35	1.66733e-09	1.8
YHR079C	IRE1	protein_coding	chrVIII	258244	261591	-1	28.56	43.03	0.00169059	1.5			YML038C	YMD8	protein_coding	chrXIII	202775	204103	-1	128.15	70.63	2.39075e-06	1.8
YER124C	DSE1	protein_coding	chrV	407342	409063	-1	267.21	412.64	2.11942e-13	1.5			YMR016C	SOK2	protein_coding	chrXIII	303236	305593	-1	58.71	32.4	2.1858e-05	1.8
YBR034C	HMT1	protein_coding	chrII	304930	305976	-1	250.18	380.52	1.00305e-07	1.5			YGL257C	MNT2	protein_coding	chrVII	12481	14157	-1	43.36	24.08	0.00230087	1.8
YNL104C	LEU4	protein_coding	chrXIV	424895	426754	-1	342.17	528.74	5.55111e-17	1.5			YGL190C	CDC55	protein_coding	chrVII	145809	147389	-1	94.5	53.16	1.78612e-05	1.8
YOL002C	IZH2	protein_coding	chrXV	323411	324364	-1	99.18	148.74	0.00204633	1.5			YKR093W	PTR2	protein_coding	chrXI	615730	617535	1	433.47	242.96	5.55111e-17	1.8
YGL028C	SCW11	protein_coding	chrVII	441281	442909	-1	300.2	440.89	3.68983e-11	1.5			YIL006W	YIA6	protein_coding	chrIX	344062	345183	1	47.93	26.27	0.00752796	1.8
YIL116W	HIS5	protein_coding	chrIX	142928	144085	1	103.21	151.76	0.0010328	1.5			YDL161W	ENT1	protein_coding	chrIV	167714	169078	1	53.26	30.39	0.00337515	1.8
YCR008W	SAT4	protein_coding	chrIII	128470	130281	1	86.3	128.31	0.000108008	1.5			YDR122W	KIN1	protein_coding	chrIV	694700	697894	1	40.21	21.86	2.97692e-05	1.8
YLR186W	EMG1	protein_coding	chrXII	523632	524390	1	120.72	182.64	0.00189556	1.5			YJL140W	RPB4	protein_coding	chrX	150961	151626	1	88.23	49.17	0.00637245	1.8
YHR052W	CIC1	protein_coding	chrVIII	210848	211978	1	122.41	189.16	5.48895e-05	1.5			YJL042W	MHP1	protein_coding	chrX	361249	365445	1	52.68	28.61	4.09449e-08	1.8
YHR143W	DSE2	protein_coding	chrVIII	385510	386487	1	829.98	1257.8	5.55111e-17	1.5			YLR335W	NUP2	protein_coding	chrXII	797430	799592	1	105.91	57.53	2.37354e-08	1.8
YFL026W	STE2	protein_coding	chrVI	82580	83875	1	593.28	866.64	3.33067e-16	1.5			YFL008W	SMC1	protein_coding	chrVI	119429	123106	1	26	14.24	0.000366102	1.8
YEL011W	GLC3	protein_coding	chrV	133120	135234	1	60.75	92.89	0.00015495	1.5			YNR006W	VPS27	protein_coding	chrXIV	636986	638854	1	46.36	26.28	0.00123437	1.8
YER001W	MNN1	protein_coding	chrV	153520	155808	1	52.21	77.73	0.000682982	1.5			YML069W	POB3	protein_coding	chrXIII	135500	137158	1	42.02	23.03	0.00234373	1.8
YBR097W	VPS15	protein_coding	chrII	436951	441315	1	17.34	25.76	0.0072297	1.5			YML010W	SPT5	protein_coding	chrXIII	247677	250868	1	73.01	41.03	8.04342e-08	1.8
YBR158W	AMN1	protein_coding	chrII	556549	558198	1	216.7	324.81	2.1592e-09	1.5			YMR276W	DSK2	protein_coding	chrXIII	818827	819948	1	191.74	108.96	3.93631e-07	1.8
YNL207W	RIO2	protein_coding	chrXIV	255353	256630	1	52.21	79.43	0.00715739	1.5			YPL101W	ELP4	protein_coding	chrXVI	360209	361579	1	70.47	39.81	0.000605993	1.8
YNL162W	RPL42A	protein_coding	chrXIV	331322	332154	1	616.96	905.44	1.30239e-11	1.5			YPL074W	YTA6	protein_coding	chrXVI	415763	418027	1	29.02	16.38	0.004641	1.8
YML100W	TSL1	protein_coding	chrXIII	70624	73920	1	56.79	87.73	2.77244e-06	1.5			YOR042W	CUE5	protein_coding	chrXV	408425	409660	1	87.83	47.69	0.000120324	1.8
YPR122W	AXL1	protein_coding	chrXVI	782045	785671	1	36.8	56.28	0.000114854	1.5			YOR065W	CYT1	protein_coding	chrXV	447439	448368	1	67.47	37.56	0.00475439	1.8
YGR143W	SKN1	protein_coding	chrVII	775193	777508	1	44.72	67.39	0.00108304	1.5			YOR301W	RAX1	protein_coding	chrXV	880965	882272	1	64.72	35.05	0.000654565	1.8
YKL010C	UFD4	protein_coding	chrXI	421424	425875	-1	27.07	38	0.00412892	1.4			YGL227W	VID30	protein_coding	chrVII	69671	72547	1	21.46	12.14	0.00621651	1.8
YDL215C	GDH2	protein_coding	chrIV	70640	73918	-1	48.9	70.24	0.000385223	1.4			YGL215W	CLG1	protein_coding	chrVII	87981	89339	1	185.42	105.22	3.77938e-08	1.8
YDR144C	MKC7	protein_coding	chrIV	744311	746101	-1	100.65	135.91	0.00209442	1.4			YGR007W	ECT1	protein_coding	chrVII	506969	507940	1	92.22	51.66	0.000825251	1.8
YDR481C	PHO8	protein_coding	chrIV	1418550	1420250	-1	94.86	133.47	0.000828569	1.4			YIL062C	ARC15	protein_coding	chrIX	243998	244462	-1	149.93	89.2	0.00722546	1.7
YCR024C-A	PMP1	protein_coding	chrIII	162945	163067	-1	1344.17	1836.93	0.0021167	1.4			YCL061C	MRC1	protein_coding	chrIII	18816	22106	-1	19.07	10.94	0.00698758	1.7
YLR058C	SHM2	protein_coding	chrXII	257992	259401	-1	894.26	1230.85	5.55111e-17	1.4			YJL157C	FAR1	protein_coding	chrX	123836	126328	-1	88.29	51.66	9.42469e-07	1.7
YHL011C	PRS3	protein_coding	chrVIII	80654	81616	-1	164.45	223.29	0.00326709	1.4			YJL094C	KHA1	protein_coding	chrX	251821	254442	-1	64.2	37.47	1.66504e-05	1.7
YFL045C	SEC53	protein_coding	chrVI	43628	44392	-1	634.04	860.36	2.80422e-07	1.4			YLR045C	STU2	protein_coding	chrXII	235037	237703	-1	33.24	19.64	0.00220139	1.7
YEL017C-A	PMP2	protein_coding	chrV	122798	122929	-1	754.53	1091.51	0.00426209	1.4			YLR247C	IRC20	protein_coding	chrXII	628684	633354	-1	30.49	18.23	0.000139489	1.7
YEL009C	GCN4	protein_coding	chrV	138918	139763	-1	1219.66	1762.41	5.55111e-17	1.4			YLR259C	HSP60	protein_coding	chrXII	663284	665002	-1	433.97	255.89	5.55111e-17	1.7
YER056C	FCY2	protein_coding	chrV	266512	268113	-1	282.26	382.91	7.24219e-07	1.4			YLR401C	DUS3	protein_coding	chrXII	922442	924448	-1	48.63	29.37	0.00193802	1.7
YER091C	MET6	protein_coding	chrV	339864	342167	-1	617.3	839.95	5.55111e-17	1.4			YER088C	DOT6	protein_coding	chrV	333176	335188	-1	159.32	95.43	1.22623e-08	1.7
YNR053C	NOG2	protein_coding	chrXIV	721120	723112	-1	173.41	248.09	2.59018e-07	1.4			YBR132C	AGP2	protein_coding	chrII	499652	501442	-1	53.39	31.69	0.00159259	1.7
YML026C	RPS18B	protein_coding	chrXIII	222987	223828	-1	612.73	830.94	1.25049e-07	1.4			YNL125C	ESBP6	protein_coding	chrXIV	390146	392167	-1	38.91	23.21	0.00449498	1.7
YPL090C	RPS6A	protein_coding	chrXVI	377291	378395	-1	499.34	680.59	2.64718e-08	1.4			YNR031C	SSK2	protein_coding	chrXIV	680694	685433	-1	24.79	14.28	0.000238533	1.7
YPR069C	SPE3	protein_coding	chrXVI	684556	685437	-1	369.26	502.44	2.14504e-05	1.4			YPL141C	FRK1	protein_coding	chrXVI	283464	286061	-1	28.75	17.23	0.00599042	1.7
YOR360C	PDE2	protein_coding	chrXV	1013241	1014821	-1	124.73	169.15	0.00108561	1.4			YPL127C	HHO1	protein_coding	chrXVI	308828	309604	-1	132.03	77.26	0.000816981	1.7
YGL147C	RPL9A	protein_coding	chrVII	227754	228329	-1	1938.35	2724.98	5.55111e-17	1.4			YOR008C	SLG1	protein_coding	chrXV	341278	342414	-1	198.85	115.2	4.45858e-07	1.7
YGL054C	ERV14	protein_coding	chrVII	400871	401287	-1	236.46	337.66	0.00622357	1.4			YOR035C	SHE4	protein_coding	chrXV	397735	400104	-1	51.69	31.32	0.000554788	1.7
YGR037C	ACB1	protein_coding	chrVII	559731	559994	-1	596.08	822.76	0.00192543	1.4			YOR138C	RUP1	protein_coding	chrXV	584309	586324	-1	33.1	19.49	0.00752698	1.7
YGR132C	PHB1	protein_coding	chrVII	755589	756452	-1	125.65	180.65	0.00338833	1.4			YOR329C	SCD5	protein_coding	chrXV	936731	939349	-1	32.32	18.75	0.00205576	1.7
YGR233C	PHO81	protein_coding	chrVII	954674	958210	-1	40.27	54.62	0.00543961	1.4			YKL101W	HSL1	protein_coding	chrXI	248920	253476	1	51.8	31.14	1.18808e-06	1.7
YKR057W	RPS21A	protein_coding	chrXI	551657	552242	1	270.24	372.53	0.00194942	1.4			YKR008W	RSC4	protein_coding	chrXI	452201	454078	1	63.64	38.36	0.00058008	1.7
YIL015W	BAR1	protein_coding	chrIX	322342	324105	1	107.84	154.69	0.000117176	1.4			YKR013W	PRY2	protein_coding	chrXI	463959	464948	1	361.17	216.1	1.68149e-09	1.7
YDR035W	ARO3	protein_coding	chrIV	521816	522928	1	189.71	262.82	0.0002759	1.4			YKR090W	PXL1	protein_coding	chrXI	608946	611066	1	32.4	19.04	0.00650825	1.7
YDR064W	RPS13	protein_coding	chrIV	579458	580452	1	888.87	1230.82	1.07692e-13	1.4			YDR351W	SBE2	protein_coding	chrIV	1178666	1181260	1	38.76	23.13	0.00132719	1.7
YDR206W	EBS1	protein_coding	chrIV	862054	864708	1	42.01	58.79	0.00632307	1.4			YDR452W	PPN1	protein_coding	chrIV	1362878	1364902	1	76.73	44.2	2.42173e-05	1.7
YDR513W	GRX2	protein_coding	chrIV	1471017	1471448	1	246.69	348.68	0.00585999	1.4			YCR052W	RSC6	protein_coding	chrIII	214994	216445	1	61.73	36.08	0.00172037	1.7
YHR183W	GND1	protein_coding	chrVIII	470960	472429	1	659.24	915.53	3.9968e-15	1.4			YCR068W	ATG15	protein_coding	chrIII	237214	238776	1	40.14	23.05	0.00698758	1.7
YFL031W	HAC1	protein_coding	chrVI	75179	76147	1	839.75	1178.24	1.00808e-13	1.4			YJL191W	RPS14B	protein_coding	chrX	73787	74611	1	365.8	214.33	1.01001e-08	1.7
YFL005W	SEC4	protein_coding	chrVI	130334	130981	1	219.79	303.2	0.00323248	1.4			YJR092W	BUD4	protein_coding	chrX	598735	603078	1	33.25	19.35	6.17156e-05	1.7
YER117W	RPL23B	protein_coding	chrV	396769	397653	1	294.85	403.3	0.00010758	1.4			YLR182W	SWI6	protein_coding	chrXII	517940	520351	1	31.8	18.55	0.0036496	1.7
YNR030W	ALG12	protein_coding	chrXIV	678799	680454	1	73.38	104.8	0.00237575	1.4			YHR154W	RTT107	protein_coding	chrVIII	402966	406178	1	32.86	19.02	0.00055421	1.7
YML063W	RPS1B	protein_coding	chrXIII	146482	147249	1	2557.38	3685.26	5.55111e-17	1.4			YBL032W	HEK2	protein_coding	chrII	160184	161329	1	173.82	104.77	8.91249e-06	1.7
YPL273W	SAM4	protein_coding	chrXVI	25087	26064	1	207.75	286.83	0.000420168	1.4			YBR003W	COQ1	protein_coding	chrII	242809	244230	1	59.53	34.54	0.00205576	1.7
YPL265W	DIP5	protein_coding	chrXVI	41043	42869	1	110.12	152.94	0.000344159	1.4			YNL233W	BNI4	protein_coding	chrXIV	211922	214600	1	38.66	23.22	0.00127172	1.7
YOR108W	LEU9	protein_coding	chrXV	523027	524841	1	122.37	175.6	3.08517e-05	1.4			YMR004W	MVP1	protein_coding	chrXIII	274017	275552	1	48.63	28.42	0.00421554	1.7
YOR136W	IDH2	protein_coding	chrXV	580250	581359	1	270.98	380.55	5.72177e-06	1.4			YPL270W	MDL2	protein_coding	chrXVI	30482	32803	1	45.9	27.26	0.000870663	1.7
YGL030W	RPL30	protein_coding	chrVII	439091	439638	1	627.03	880.38	1.2658e-06	1.4			YOR030W	DFG16	protein_coding	chrXV	386825	388684	1	38.55	22.3	0.00436769	1.7
YGR034W	RPL26B	protein_coding	chrVII	555812	556672	1	458.08	661.75	1.475e-08	1.4			YOR140W	SFL1	protein_coding	chrXV	586981	589281	1	32.03	18.97	0.00541121	1.7
YGR135W	PRE9	protein_coding	chrVII	761392	762168	1	147.41	209.31	0.00375923	1.4			YGL141W	HUL5	protein_coding	chrVII	238353	241085	1	27.7	16.37	0.0046849	1.7
YKR094C	RPL40B	protein_coding	chrXI	617996	618750	-1	725.55	915.13	4.518e-05	1.3			YKL165C	MCD4	protein_coding	chrXI	137932	140691	-1	76.5	46.67	7.46735e-06	1.6
YDL081C	RPP1A	protein_coding	chrIV	309802	310122	-1	1818.2	2353.03	2.52655e-06	1.3			YKL103C	APE1	protein_coding	chrXI	246138	247682	-1	57.37	35.32	0.00430014	1.6
YDR155C	CPR1	protein_coding	chrIV	768512	769000	-1	3071.44	4080.31	1.11022e-16	1.3			YKR092C	SRP40	protein_coding	chrXI	612665	613885	-1	180.27	110.85	6.4968e-06	1.6
YDR224C	HTB1	protein_coding	chrIV	914317	914712	-1	955.74	1201.76	0.000828077	1.3			YDR497C	ITR1	protein_coding	chrIV	1443713	1445467	-1	279.78	179.12	4.26441e-10	1.6
YDR276C	PMP3	protein_coding	chrIV	1013476	1013643	-1	1375.4	1767.2	0.00406094	1.3			YJL165C	HAL5	protein_coding	chrX	106894	109461	-1	82.61	52.71	3.59229e-05	1.6
YDR345C	HXT3	protein_coding	chrIV	1162957	1164660	-1	839.33	1096.63	1.90958e-14	1.3			YLR433C	CNA1	protein_coding	chrXII	1004347	1006008	-1	56.93	36.12	0.00527875	1.6
YDR447C	RPS17B	protein_coding	chrIV	1354829	1355553	-1	380.53	475.75	0.00545347	1.3			YHL040C	ARN1	protein_coding	chrVIII	19088	20971	-1	71.9	45.77	0.000912827	1.6
YDR500C	RPL37B	protein_coding	chrIV	1450198	1450853	-1	648.3	811.97	0.000501954	1.3			YHR008C	SOD2	protein_coding	chrVIII	122889	123590	-1	239.77	150.82	0.000155276	1.6
YJR139C	HOM6	protein_coding	chrX	689445	690524	-1	538.57	703.42	1.08298e-06	1.3			YHR082C	KSP1	protein_coding	chrVIII	268459	271548	-1	116.04	73.47	4.99742e-08	1.6
YJR145C	RPS4A	protein_coding	chrX	702027	703068	-1	1256.92	1574.41	1.00122e-09	1.3			YHR135C	YCK1	protein_coding	chrVIII	372694	374310	-1	69.6	42.53	0.00110925	1.6
YLR027C	AAT2	protein_coding	chrXII	196829	198085	-1	400.93	503.64	0.000122788	1.3			YFR028C	CDC14	protein_coding	chrVI	208413	210068	-1	78.19	50.09	0.00136651	1.6
YLR083C	EMP70	protein_coding	chrXII	294091	296094	-1	216.19	275.06	0.000162608	1.3			YFR051C	RET2	protein_coding	chrVI	250163	251803	-1	169.33	103.1	2.51914e-07	1.6
YLR354C	TAL1	protein_coding	chrXII	836350	837357	-1	700.54	922.58	2.85568e-08	1.3			YEL060C	PRB1	protein_coding	chrV	40046	41953	-1	123.71	78.37	9.91538e-06	1.6
YHR021C	RPS27B	protein_coding	chrVIII	147871	148669	-1	614.54	801.9	8.07015e-06	1.3			YBR059C	AKL1	protein_coding	chrII	356861	360187	-1	44.9	27.23	0.00014056	1.6
YEL002C	WBP1	protein_coding	chrV	148722	150014	-1	268.06	346.11	0.000328116	1.3			YBR248C	HIS7	protein_coding	chrII	714807	716465	-1	53.43	34.21	0.00799744	1.6
YER052C	HOM3	protein_coding	chrV	256375	257958	-1	190.52	245.31	0.000921684	1.3			YNL059C	ARP5	protein_coding	chrXIV	512668	514935	-1	53.14	33.21	0.00119637	1.6
YBR126C	TPS1	protein_coding	chrII	488905	490392	-1	182.73	242.07	0.000427397	1.3			YPL240C	HSP82	protein_coding	chrXVI	96496	98625	-1	126.72	80.97	3.36052e-06	1.6
YBR249C	ARO4	protein_coding	chrII	716882	717994	-1	505.6	679.62	8.84767e-08	1.3			YOL016C	CMK2	protein_coding	chrXV	294777	296120	-1	161.55	99.89	9.24267e-06	1.6
YNL055C	POR1	protein_coding	chrXIV	517994	518845	-1	848.69	1086.38	5.65085e-07	1.3			YOR371C	GPB1	protein_coding	chrXV	1031489	1034182	-1	32.16	20.26	0.00678508	1.6
YML004C	GLO1	protein_coding	chrXIII	261705	262685	-1	190.87	249.23	0.00571327	1.3			YGL056C	SDS23	protein_coding	chrVII	396035	397618	-1	82.37	53.06	0.00147541	1.6
YMR259C	TRM732	protein_coding	chrXIII	784621	788883	-1	47.43	63.75	0.0013427	1.3			YGR119C	NUP57	protein_coding	chrVII	728046	729671	-1	64.93	41.62	0.00387464	1.6
YAR002C-A	ERP1	protein_coding	chrI	154065	154724	-1	235.41	312.57	0.00723661	1.3			YKL117W	SBA1	protein_coding	chrXI	220324	220974	1	226.43	142.52	0.000407025	1.6
YGL076C	RPL7A	protein_coding	chrVII	364335	365996	-1	370.94	489.27	1.8191e-07	1.3			YIL126W	STH1	protein_coding	chrIX	117992	122071	1	68.6	43.34	1.32131e-06	1.6
YGL009C	LEU1	protein_coding	chrVII	476313	478652	-1	673.78	878.34	1.66534e-15	1.3			YDL195W	SEC31	protein_coding	chrIV	107208	111029	1	240.79	155.07	5.55111e-17	1.6
YGR180C	RNR4	protein_coding	chrVII	855264	856301	-1	713.88	908.54	7.86807e-07	1.3			YDR213W	UPC2	protein_coding	chrIV	889751	892492	1	31.96	20.3	0.0073749	1.6
YKL216W	URA1	protein_coding	chrXI	25215	26159	1	528.03	696.49	2.67921e-06	1.3			YJL145W	SFH5	protein_coding	chrX	145160	146044	1	105.79	67.83	0.00656874	1.6
YKL109W	HAP4	protein_coding	chrXI	232227	233891	1	189.62	249.77	0.000204406	1.3			YJR138W	IML1	protein_coding	chrX	684567	689321	1	21.36	13.08	0.00203058	1.6
YKL080W	VMA5	protein_coding	chrXI	285030	286208	1	369.16	497.15	2.18131e-06	1.3			YLL008W	DRS1	protein_coding	chrXII	131729	133987	1	65.69	40.1	0.000176489	1.6
YKL006W	RPL14A	protein_coding	chrXI	431906	432720	1	306.74	408.48	0.000571364	1.3			YLR187W	SKG3	protein_coding	chrXII	524865	527945	1	33.62	21.61	0.00444106	1.6
YIL148W	RPL40A	protein_coding	chrIX	68708	69528	1	1333.23	1721.68	1.68653e-10	1.3			YLR188W	MDL1	protein_coding	chrXII	528300	530387	1	58.19	36.07	0.000957456	1.6
YDR382W	RPP2B	protein_coding	chrIV	1239492	1239824	1	3257.12	4156.25	1.49956e-09	1.3			YLR196W	PWP1	protein_coding	chrXII	543968	545698	1	159.38	99.63	9.61089e-07	1.6
YDR450W	RPS18A	protein_coding	chrIV	1359923	1360798	1	509.36	681.57	2.80377e-06	1.3			YHR146W	CRP1	protein_coding	chrVIII	390300	391697	1	104.73	64.8	0.000276425	1.6
YJR105W	ADO1	protein_coding	chrX	623581	624603	1	468.29	627.38	1.0846e-06	1.3			YFL047W	RGD2	protein_coding	chrVI	40421	42565	1	37.61	22.9	0.00546472	1.6
YLR061W	RPL22A	protein_coding	chrXII	263194	263948	1	592.31	769.11	2.96363e-05	1.3			YER020W	GPA2	protein_coding	chrV	195168	196517	1	68.61	42.04	0.00324531	1.6
YLR167W	RPS31	protein_coding	chrXII	498947	499405	1	4882.25	6508.61	5.55111e-17	1.3			YBR083W	TEC1	protein_coding	chrII	409169	410629	1	74.31	45.57	0.00146427	1.6
YLR413W	INA1	protein_coding	chrXII	951156	953183	1	667.91	882.14	7.66054e-15	1.3			YNL212W	VID27	protein_coding	chrXIV	247461	249809	1	48.76	30.67	0.00180408	1.6
YHR010W	RPL27A	protein_coding	chrVIII	126521	127492	1	525.66	705.21	4.16888e-07	1.3			YNL192W	CHS1	protein_coding	chrXIV	276502	279897	1	119.66	77.14	2.11244e-08	1.6
YEL071W	DLD3	protein_coding	chrV	16355	17845	1	231.79	292.09	0.00125246	1.3			YNR046W	TRM112	protein_coding	chrXIV	707788	708195	1	231.91	147.14	0.00527875	1.6
YEL026W	SNU13	protein_coding	chrV	101943	102323	1	860.04	1085.78	0.00153343	1.3			YML093W	UTP14	protein_coding	chrXIII	83090	85789	1	59.76	37.19	0.000158508	1.6
YBR074W	PFF1	protein_coding	chrII	386286	389216	1	76.46	97.57	0.00599211	1.3			YML057W	CMP2	protein_coding	chrXIII	160180	161994	1	45.55	27.66	0.00473977	1.6
YBR118W	TEF2	protein_coding	chrII	477671	479047	1	2031.74	2742.64	5.55111e-17	1.3			YPR129W	SCD6	protein_coding	chrXVI	792687	793736	1	130.9	82.12	0.0005928	1.6
YBR189W	RPS9B	protein_coding	chrII	604508	605508	1	1237.76	1636.71	8.17124e-14	1.3			YOR191W	ULS1	protein_coding	chrXV	692475	697334	1	28.9	17.97	0.000415523	1.6
YNL178W	RPS3	protein_coding	chrXIV	302680	303402	1	2936.96	3923.69	5.55111e-17	1.3			YAL051W	OAF1	protein_coding	chrI	48564	51707	1	40.23	24.65	0.000580327	1.6
YMR143W	RPS16A	protein_coding	chrXIII	551928	552903	1	650.04	832.05	2.80061e-06	1.3			YGR014W	MSB2	protein_coding	chrVII	516943	520863	1	170.44	103.83	1.33227e-15	1.6
YMR230W	RPS10B	protein_coding	chrXIII	732414	733141	1	247.63	323.85	0.00635425	1.3			YDR190C	RVB1	protein_coding	chrIV	840604	841995	-1	100.17	68.22	0.00356992	1.5
YMR297W	PRC1	protein_coding	chrXIII	861922	863520	1	368.12	465.55	1.87074e-05	1.3			YDR283C	GCN2	protein_coding	chrIV	1025070	1030049	-1	28.4	18.63	0.00142932	1.5
YPL126W	NAN1	protein_coding	chrXVI	310210	312900	1	134.35	177.66	5.48099e-05	1.3			YDR372C	VPS74	protein_coding	chrIV	1221112	1222149	-1	164.08	109.36	0.000720988	1.5
YPL079W	RPL21B	protein_coding	chrXVI	406636	407539	1	548.67	720.83	4.06515e-06	1.3			YCL011C	GBP2	protein_coding	chrIII	102075	103358	-1	107.82	70.56	0.00151858	1.5
YPR028W	YOP1	protein_coding	chrXVI	623527	624202	1	262.25	345.54	0.00533853	1.3			YJL207C	LAA1	protein_coding	chrX	41389	47433	-1	63.27	42.07	3.5204e-07	1.5
YOL127W	RPL25	protein_coding	chrXV	80348	81190	1	935.72	1227.46	7.62229e-09	1.3			YJL158C	CIS3	protein_coding	chrX	122265	122948	-1	726.6	501.07	9.31671e-08	1.5
YGR118W	RPS23A	protein_coding	chrVII	726974	727730	1	422.34	550.8	0.000325879	1.3			YJL080C	SCP160	protein_coding	chrX	285558	289226	-1	321.41	212.71	5.55111e-17	1.5
													YJR031C	GEA1	protein_coding	chrX	486586	490812	-1	39.58	25.56	0.000340734	1.5
													YJR045C	SSC1	protein_coding	chrX	519638	521602	-1	704.03	469.38	5.55111e-17	1.5
													YER008C	SEC3	protein_coding	chrV	167808	171818	-1	36.25	24.22	0.00187913	1.5
													YER122C	GLO3	protein_coding	chrV	402871	404352	-1	106.18	72.18	0.0018759	1.5
													YBL105C	PKC1	protein_coding	chrII	14241	17696	-1	55.33	36.64	0.000277721	1.5
													YBR222C	PCS60	protein_coding	chrII	666720	668351	-1	139.75	90.29	2.92914e-05	1.5
													YNL313C	EMW1	protein_coding	chrXIV	45308	48022	-1	69.7	47.84	0.000861493	1.5
													YML130C	ERO1	protein_coding	chrXIII	11483	13174	-1	120.08	82.57	0.000586324	1.5
													YPL115C	BEM3	protein_coding	chrXVI	332100	335486	-1	46.17	30.29	0.00080443	1.5
													YOR048C	RAT1	protein_coding	chrXV	418630	421650	-1	67.59	45.16	0.000231936	1.5
													YOR056C	NOB1	protein_coding	chrXV	430247	431626	-1	69.29	45.08	0.00766421	1.5
													YOR256C	TRE2	protein_coding	chrXV	808254	810683	-1	40.17	26.05	0.00668701	1.5
													YOR271C	FSF1	protein_coding	chrXV	831059	832042	-1	138.67	93.18	0.00295283	1.5
													YGL201C	MCM6	protein_coding	chrVII	117854	120907	-1	39.13	26.09	0.00463755	1.5
													YGL038C	OCH1	protein_coding	chrVII	425362	426804	-1	124.93	83.21	0.00049282	1.5
													YGR189C	CRH1	protein_coding	chrVII	876669	878192	-1	433.94	280.04	9.88543e-13	1.5
													YKL127W	PGM1	protein_coding	chrXI	203541	205253	1	176.75	120.43	1.79285e-05	1.5
													YKL096W	CWP1	protein_coding	chrXI	261132	261851	1	377.64	253.17	2.4643e-05	1.5
													YDR388W	RVS167	protein_coding	chrIV	1250186	1251634	1	118.23	78.34	0.000593112	1.5
													YCR088W	ABP1	protein_coding	chrIII	265068	266846	1	137.72	88.96	1.47385e-05	1.5
													YJR001W	AVT1	protein_coding	chrX	436802	438610	1	83.14	56.72	0.00258009	1.5
													YJR046W	TAH11	protein_coding	chrX	522048	523862	1	73.53	49.91	0.00407276	1.5
													YJR148W	BAT2	protein_coding	chrX	705744	706874	1	208.71	138.01	5.11607e-05	1.5
													YLL028W	TPO1	protein_coding	chrXII	84804	86564	1	82.57	53.3	0.000831146	1.5
													YHR023W	MYO1	protein_coding	chrVIII	151666	157452	1	42.34	28.29	5.51169e-05	1.5
													YHR026W	VMA16	protein_coding	chrVIII	160844	161485	1	276.14	181.92	0.000402722	1.5
													YHR108W	GGA2	protein_coding	chrVIII	328303	330060	1	280.44	183.78	2.42784e-09	1.5
													YHR204W	MNL1	protein_coding	chrVIII	506319	508709	1	53.74	35.61	0.00293393	1.5
													YEL022W	GEA2	protein_coding	chrV	111421	115800	1	82.77	54.33	3.4024e-07	1.5
													YER167W	BCK2	protein_coding	chrV	518216	520771	1	53.77	36.3	0.0031492	1.5
													YNL186W	UBP10	protein_coding	chrXIV	289498	291876	1	92.94	61.48	8.973e-05	1.5
													YNL094W	APP1	protein_coding	chrXIV	447611	449374	1	64.93	43.31	0.00564108	1.5
													YNL073W	MSK1	protein_coding	chrXIV	488386	490116	1	73.07	48.55	0.00334587	1.5
													YMR173W	DDR48	protein_coding	chrXIII	608689	609981	1	185.64	125.78	0.000109403	1.5
													YOR382W	FIT2	protein_coding	chrXV	1059531	1059992	1	310.43	207.91	0.00213854	1.5
													YGL228W	SHE10	protein_coding	chrVII	67598	69331	1	106.84	71.13	0.000407647	1.5
													YGL100W	SEH1	protein_coding	chrVII	313234	314283	1	112.88	76.93	0.00731399	1.5
													YGR032W	GSC2	protein_coding	chrVII	548264	553951	1	28.54	19.57	0.00198224	1.5
													YGR116W	SPT6	protein_coding	chrVII	720409	724764	1	168.05	110	3.14526e-13	1.5
													YKR054C	DYN1	protein_coding	chrXI	535647	547925	-1	20.03	14.04	0.000310537	1.4
													YIL115C	NUP159	protein_coding	chrIX	144327	148709	-1	69.08	50.8	0.000455769	1.4
													YDL167C	NRP1	protein_coding	chrIV	160995	163154	-1	66.4	45.98	0.0045296	1.4
													YDR310C	SUM1	protein_coding	chrIV	1081128	1084316	-1	43.72	30.8	0.00734727	1.4
													YJR009C	TDH2	protein_coding	chrX	453683	454681	-1	4648.9	3414.37	5.55111e-17	1.4
													YJR065C	ARP3	protein_coding	chrX	557809	559158	-1	226.49	164.94	0.000287915	1.4
													YLR028C	ADE16	protein_coding	chrXII	199540	201315	-1	113.28	80.51	0.00165111	1.4
													YLR071C	RGR1	protein_coding	chrXII	275378	278626	-1	51.5	36.28	0.00331898	1.4
													YLR347C	KAP95	protein_coding	chrXII	823828	826413	-1	228.77	159.97	1.81333e-08	1.4
													YLR436C	ECM30	protein_coding	chrXII	1007421	1011245	-1	54.16	38.24	0.0011565	1.4
													YHL033C	RPL8A	protein_coding	chrVIII	35255	36025	-1	1074.78	767.31	2.79948e-10	1.4
													YHR039C	MSC7	protein_coding	chrVIII	184875	186809	-1	90.08	63.74	0.00305039	1.4
													YHR158C	KEL1	protein_coding	chrVIII	413685	417179	-1	52.72	37.79	0.00325053	1.4
													YHR186C	KOG1	protein_coding	chrVIII	475999	480672	-1	33.24	23.35	0.00436343	1.4
													YBL047C	EDE1	protein_coding	chrII	127895	132040	-1	188.58	131.37	6.48853e-11	1.4
													YBR023C	CHS3	protein_coding	chrII	284428	287925	-1	98.23	68.96	2.16849e-05	1.4
													YBR036C	CSG2	protein_coding	chrII	309081	310313	-1	247.18	180.59	0.000335968	1.4
													YBR177C	EHT1	protein_coding	chrII	584807	586162	-1	105.77	74.06	0.00574058	1.4
													YNL121C	TOM70	protein_coding	chrXIV	398684	400537	-1	175.67	129.52	0.000308976	1.4
													YNL007C	SIS1	protein_coding	chrXIV	618507	619565	-1	177.75	124.71	0.00164445	1.4
													YPL256C	CLN2	protein_coding	chrXVI	64977	66614	-1	113.1	78.63	0.00139659	1.4
													YPL217C	BMS1	protein_coding	chrXVI	139620	143171	-1	46.83	33.8	0.00610602	1.4
													YOL158C	ENB1	protein_coding	chrXV	19491	21311	-1	129.08	89.31	0.000270097	1.4
													YOL145C	CTR9	protein_coding	chrXV	49555	52788	-1	55.43	40.84	0.00728866	1.4
													YOL041C	NOP12	protein_coding	chrXV	251267	252646	-1	127.75	88.59	0.00170606	1.4
													YAL023C	PMT2	protein_coding	chrI	106272	108551	-1	292.68	204.9	2.51922e-09	1.4
													YGL173C	XRN1	protein_coding	chrVII	175527	180113	-1	263.38	187.99	2.4647e-14	1.4
													YGL120C	PRP43	protein_coding	chrVII	281634	283937	-1	189.77	135.02	3.73166e-06	1.4
													YGL040C	HEM2	protein_coding	chrVII	419527	420555	-1	154.87	109.26	0.00429747	1.4
													YGR245C	SDA1	protein_coding	chrVII	979765	982068	-1	93.81	66.32	0.000944855	1.4
													YIL130W	ASG1	protein_coding	chrIX	102782	105676	1	48.16	33.56	0.00581504	1.4
													YDL095W	PMT1	protein_coding	chrIV	287059	289512	1	269.9	198.37	2.06512e-07	1.4
													YDR168W	CDC37	protein_coding	chrIV	790328	791848	1	98.22	68.89	0.00500443	1.4
													YDR189W	SLY1	protein_coding	chrIV	838392	840392	1	92.08	67.09	0.00495098	1.4
													YDR398W	UTP5	protein_coding	chrIV	1267471	1269402	1	87.64	62.71	0.00459236	1.4
													YCR033W	SNT1	protein_coding	chrIII	186489	190169	1	45.73	32.91	0.00542795	1.4
													YJL174W	KRE9	protein_coding	chrX	95092	95922	1	251.69	174.69	0.000650662	1.4
													YHR206W	SKN7	protein_coding	chrVIII	512732	514600	1	125.76	90.52	0.00101593	1.4
													YFR052W	RPN12	protein_coding	chrVI	252505	253329	1	231.79	169.35	0.00450534	1.4
													YEL007W	MIT1	protein_coding	chrV	141892	143892	1	80.63	55.64	0.00238131	1.4
													YER164W	CHD1	protein_coding	chrV	505392	509798	1	47.01	32.69	0.000734655	1.4
													YER166W	DNF1	protein_coding	chrV	512744	517459	1	72.02	51.15	4.21193e-05	1.4
													YBR078W	ECM33	protein_coding	chrII	393123	394742	1	1262.19	912.96	5.55111e-17	1.4
													YNL243W	SLA2	protein_coding	chrXIV	188051	190957	1	87.71	64.96	0.00163743	1.4
													YNL091W	NST1	protein_coding	chrXIV	452408	456130	1	54.57	38.7	0.00146672	1.4
													YMR109W	MYO5	protein_coding	chrXIII	486587	490246	1	63.68	45.93	0.00113958	1.4
													YMR215W	GAS3	protein_coding	chrXIII	696796	698370	1	325.04	235.63	2.0008e-06	1.4
													YPR103W	PRE2	protein_coding	chrXVI	732349	733212	1	225.94	162.97	0.00290933	1.4
													YOR027W	STI1	protein_coding	chrXV	381053	382822	1	340.43	246.67	2.41582e-07	1.4
													YOR153W	PDR5	protein_coding	chrXV	619840	624375	1	1148.36	815.5	5.55111e-17	1.4
													YGL234W	ADE5,7	protein_coding	chrVII	56482	58890	1	554.84	397.36	1.9984e-15	1.4
													YGR204W	ADE3	protein_coding	chrVII	905934	908774	1	358.99	248.19	2.91989e-14	1.4
													YKL054C	DEF1	protein_coding	chrXI	336537	338753	-1	237.2	177.24	1.08783e-05	1.3
													YKR001C	VPS1	protein_coding	chrXI	440608	442722	-1	175.65	134.18	0.000588709	1.3
													YDR170C	SEC7	protein_coding	chrIV	796193	802222	-1	142.21	107.88	8.95828e-08	1.3
													YDR293C	SSD1	protein_coding	chrIV	1045640	1049392	-1	137.2	106.16	0.000110001	1.3
													YCL037C	SRO9	protein_coding	chrIII	57374	58678	-1	228.2	176.48	0.00322115	1.3
													YLL018C	DPS1	protein_coding	chrXII	109902	111575	-1	343.3	266.03	4.85892e-05	1.3
													YLR120C	YPS1	protein_coding	chrXII	386511	388220	-1	289.47	230.43	0.000682182	1.3
													YLR310C	CDC25	protein_coding	chrXII	752224	756993	-1	56.58	44.16	0.00670769	1.3
													YHR027C	RPN1	protein_coding	chrVIII	161730	164711	-1	193.05	143.48	2.86877e-06	1.3
													YHR047C	AAP1	protein_coding	chrVIII	198740	201310	-1	162.32	124.39	0.000315452	1.3
													YHR165C	PRP8	protein_coding	chrVIII	429707	436948	-1	62.3	47.02	8.02343e-05	1.3
													YER145C	FTR1	protein_coding	chrV	460526	461740	-1	168.05	125.77	0.00639385	1.3
													YER155C	BEM2	protein_coding	chrV	476345	482848	-1	114.54	88.78	3.79068e-06	1.3
													YBL022C	PIM1	protein_coding	chrII	177874	181275	-1	96.9	76.68	0.0045145	1.3
													YNL031C	HHT2	protein_coding	chrXIV	575640	576050	-1	1892.6	1489.87	8.46865e-06	1.3
													YMR229C	RRP5	protein_coding	chrXIII	725934	731123	-1	298.03	232.39	7.40422e-11	1.3
													YPL057C	SUR1	protein_coding	chrXVI	451909	453057	-1	314.66	237.49	0.00041417	1.3
													YPR181C	SEC23	protein_coding	chrXVI	897361	899667	-1	542.67	403.58	5.61973e-12	1.3
													YOR098C	NUP1	protein_coding	chrXV	507948	511178	-1	86.93	65.88	0.00213541	1.3
													YAL021C	CCR4	protein_coding	chrI	110846	113359	-1	135.89	105.07	0.00159133	1.3
													YGL150C	INO80	protein_coding	chrVII	221104	225573	-1	58.82	45.17	0.00453525	1.3
													YGR285C	ZUO1	protein_coding	chrVII	1061852	1063153	-1	732.07	548.27	4.12462e-09	1.3
													YIL123W	SIM1	protein_coding	chrIX	128151	129581	1	327.12	250.95	0.000143794	1.3
													YIL076W	SEC28	protein_coding	chrIX	216658	217548	1	223.56	167.83	0.00764515	1.3
													YDR432W	NPL3	protein_coding	chrIV	1328783	1330027	1	475.99	365.59	2.05087e-05	1.3
													YJL034W	KAR2	protein_coding	chrX	381327	383375	1	503.09	378.22	1.54523e-09	1.3
													YJR066W	TOR1	protein_coding	chrX	559416	566828	1	45.28	35.34	0.00249995	1.3
													YLR454W	FMP27	protein_coding	chrXII	1043998	1051884	1	41.29	31.69	0.0015452	1.3
													YHR025W	THR1	protein_coding	chrVIII	159438	160511	1	411.75	318.1	0.00031431	1.3
													YHR042W	NCP1	protein_coding	chrVIII	190543	192618	1	245.16	186.65	4.7188e-05	1.3
													YER025W	GCD11	protein_coding	chrV	205251	206834	1	323.19	255.65	0.000394152	1.3
													YNL088W	TOP2	protein_coding	chrXIV	457704	461990	1	56.22	43.28	0.00706121	1.3
													YNL016W	PUB1	protein_coding	chrXIV	602907	604268	1	539.67	430.35	3.97591e-05	1.3
													YML048W	GSF2	protein_coding	chrXIII	178426	179637	1	308.98	244.06	0.00229832	1.3
													YPL085W	SEC16	protein_coding	chrXVI	387067	393654	1	34.17	25.68	0.00473969	1.3
													YPR183W	DPM1	protein_coding	chrXVI	900755	901558	1	386.5	289.17	0.00075784	1.3
													YOL004W	SIN3	protein_coding	chrXV	316938	321548	1	73.66	58.23	0.00381925	1.3
													YOR168W	GLN4	protein_coding	chrXV	649303	651732	1	303.71	225.49	1.05559e-07	1.3
													YOR204W	DED1	protein_coding	chrXV	722911	724725	1	1391.63	1083.09	5.55111e-17	1.3
													YOR247W	SRL1	protein_coding	chrXV	797676	798308	1	849.65	639.73	1.41905e-05	1.3
													YAL042W	ERV46	protein_coding	chrI	61316	62563	1	221.06	167.05	0.00212467	1.3
													YGL014W	PUF4	protein_coding	chrVII	466141	468807	1	112.03	84.72	0.00142255	1.3
													YGR162W	TIF4631	protein_coding	chrVII	824059	826917	1	395.74	313.82	1.82853e-07	1.3
													YGR281W	YOR1	protein_coding	chrVII	1052824	1057257	1	97.26	76.56	0.000910446	1.3

## Sheet: DE genes in sir2
List of DE genes in wt vs ∆sir2
UP - regulated genes													DN - regulated genes
systematic name	standard name	orf type	chr	start	end	strand	wt_S27	sir2-KAN_S31	pv	FC			systematic name	standard name	orf type	chr	start	end	strand	wt_S27	sir2-KAN_S31	pv	FC
YAR071W	PHO11	protein_coding	chrI	225460	226863	1	0.71	38.11	1.01574e-12	53.7			YFL026W	STE2	protein_coding	chrVI	82580	83875	1	593.28	2.06	5.55111e-17	287.4
YGR138C	TPO2	protein_coding	chrVII	763762	765606	-1	2.7	51.72	5.55111e-17	19.2			YJL157C	FAR1	protein_coding	chrX	123836	126328	-1	88.69	0.36	5.55111e-17	247.9
YOL155C	HPF1	protein_coding	chrXV	28703	31606	-1	13.72	199.63	5.55111e-17	14.6			YNL145W	MFA2	protein_coding	chrXIV	352414	352530	1	1702.53	7.62	5.55111e-17	223.3
YPR157W	TDA6	protein_coding	chrXVI	841266	842669	1	2.84	34.94	5.50798e-10	12.3			YDR461W	MFA1	protein_coding	chrIV	1385176	1385286	1	637.07	8.03	1.11022e-16	79.3
YLR408C	BLS1	protein_coding	chrXII	933885	934253	-1	2.7	31.42	0.00275012	11.6			YBL016W	FUS3	protein_coding	chrII	192451	193512	1	65.65	0.84	2.22045e-16	78.2
YBR093C	PHO5	protein_coding	chrII	429548	430951	-1	19.15	200.73	5.55111e-17	10.5			YDL042C	SIR2	protein_coding	chrIV	376757	378445	-1	38.33	0.53	2.88658e-15	72.6
YGL259W	YPS5	protein_coding	chrVII	8470	8967	1	2	19.7	0.00718203	9.9			YDL227C	HO	protein_coding	chrIV	46271	48031	-1	35.63	0.51	7.88258e-15	70.4
YHR136C	SPL2	protein_coding	chrVIII	374654	375100	-1	33.42	325.22	5.55111e-17	9.7			YGL032C	AGA2	protein_coding	chrVII	436570	436833	-1	184.86	3.38	9.70646e-12	54.7
YCR021C	HSP30	protein_coding	chrIII	156109	157107	-1	21.93	188.37	5.55111e-17	8.6			YKL209C	STE6	protein_coding	chrXI	42423	46295	-1	107.24	2.3	5.55111e-17	46.6
YGR230W	BNS1	protein_coding	chrVII	951894	952307	1	4.81	40.93	0.000570383	8.5			YOR212W	STE4	protein_coding	chrXV	742910	744181	1	128.41	2.8	5.55111e-17	45.8
YCL047C	POF1	protein_coding	chrIII	43661	44437	-1	5.13	40.17	4.17997e-06	7.8			YIL015W	BAR1	protein_coding	chrIX	322342	324105	1	107.84	2.53	5.55111e-17	42.7
YDR281C	PHM6	protein_coding	chrIV	1022007	1022321	-1	12.65	70.78	0.000340403	5.6			YOL104C	NDJ1	protein_coding	chrXV	116396	117454	-1	22.57	0.84	3.63059e-06	26.8
YJR097W	JJJ3	protein_coding	chrX	612413	612931	1	5.76	29.21	0.00415848	5.1			YDR103W	STE5	protein_coding	chrIV	658350	661103	1	50.99	1.94	5.55111e-17	26.2
YLR132C	USB1	protein_coding	chrXII	407283	408155	-1	4.56	20.43	0.00293456	4.5			YCR018C	SRD1	protein_coding	chrIII	148238	148903	-1	34.4	1.34	6.10197e-06	25.7
YML123C	PHO84	protein_coding	chrXIII	24037	25800	-1	484.44	2110.85	5.55111e-17	4.4			YBR157C	ICS2	protein_coding	chrII	553543	554310	-1	25.94	1.16	2.91112e-05	22.3
YGL263W	COS12	protein_coding	chrVII	2790	3932	1	13.07	56.96	1.86518e-08	4.4			YJR086W	STE18	protein_coding	chrX	586068	586400	1	59.82	2.68	2.91112e-05	22.3
YMR158W	MRPS8	protein_coding	chrXIII	572248	572715	1	14.9	64.79	0.000125428	4.3			YDL160C-A	MHF2	protein_coding	chrIV	169366	169608	-1	77.87	3.67	4.90981e-05	21.2
YMR233W	TRI1	protein_coding	chrXIII	739185	739865	1	8.78	35.36	0.00092494	4			YGR044C	RME1	protein_coding	chrVII	582990	583892	-1	61.77	2.96	3.37785e-12	20.8
YPL019C	VTC3	protein_coding	chrXVI	514511	517018	-1	128.27	495.36	5.55111e-17	3.9			YOR382W	FIT2	protein_coding	chrXV	1059531	1059992	1	310.43	17.37	5.55111e-17	17.9
YOR107W	RGS2	protein_coding	chrXV	521353	522282	1	20.35	78.64	1.44986e-08	3.9			YPR122W	AXL1	protein_coding	chrXVI	782045	785671	1	36.8	2.21	5.55111e-17	16.6
YNL336W	COS1	protein_coding	chrXIV	8330	9475	1	20.86	71.6	1.45453e-08	3.4			YHR005C	GPA1	protein_coding	chrVIII	113499	114917	-1	38.6	2.51	1.81661e-11	15.4
YPR046W	MCM16	protein_coding	chrXVI	656799	657344	1	10.94	37.57	0.00460526	3.4			YBR217W	ATG12	protein_coding	chrII	657832	658392	1	21.3	1.59	0.00197872	13.4
YKL053C-A	MDM35	protein_coding	chrXI	339182	339442	-1	22.9	75.18	0.00681825	3.3			YJR047C	ANB1	protein_coding	chrX	524908	525381	-1	44.13	3.76	5.68996e-05	11.7
YBR054W	YRO2	protein_coding	chrII	343101	344135	1	17.32	56.87	2.78291e-06	3.3			YLR265C	NEJ1	protein_coding	chrXII	674427	675455	-1	18.39	1.73	0.000159488	10.6
YGR029W	ERV1	protein_coding	chrVII	543553	544205	1	9.15	30.05	0.00681825	3.3			YOR383C	FIT3	protein_coding	chrXV	1060441	1061055	-1	344.95	34.8	5.55111e-17	9.9
YDR240C	SNU56	protein_coding	chrIV	943674	945152	-1	9.43	29.55	8.42627e-05	3.1			YNR044W	AGA1	protein_coding	chrXIV	703699	705876	1	70.42	7.37	5.55111e-17	9.6
YER050C	RSM18	protein_coding	chrV	253971	254387	-1	26.27	81.27	0.000590804	3.1			YOL071W	SDH5	protein_coding	chrXV	196507	196995	1	42.77	5.47	0.000166531	7.8
YDL219W	DTD1	protein_coding	chrIV	65242	65765	1	13.31	40.85	0.00656552	3.1			YBR293W	VBA2	protein_coding	chrII	787006	788430	1	18.17	2.5	3.7194e-05	7.3
YPL175W	SPT14	protein_coding	chrXVI	218630	220088	1	9.56	29.95	8.42627e-05	3.1			YBR073W	RDH54	protein_coding	chrII	383112	385988	1	61.27	9.3	5.55111e-17	6.6
YOR253W	NAT5	protein_coding	chrXV	804377	804907	1	33.76	105.81	8.25728e-06	3.1			YLR452C	SST2	protein_coding	chrXII	1039270	1041366	-1	102.59	15.74	5.55111e-17	6.5
YGL209W	MIG2	protein_coding	chrVII	95858	97006	1	24.27	75.29	3.82781e-08	3.1			YOL054W	PSH1	protein_coding	chrXV	228614	229834	1	26.92	4.38	8.08509e-06	6.1
YFL029C	CAK1	protein_coding	chrVI	78055	79161	-1	9	26.59	0.00185516	3			YNL265C	IST1	protein_coding	chrXIV	144280	145281	-1	31.81	5.34	1.3089e-05	6
YKL027W	TCD2	protein_coding	chrXI	387562	388905	1	14.82	44.46	7.56197e-06	3			YBR083W	TEC1	protein_coding	chrII	409169	410629	1	74.31	12.82	1.44329e-15	5.8
YMR028W	TAP42	protein_coding	chrXIII	327482	328582	1	7.24	21.87	0.0042989	3			YDR453C	TSA2	protein_coding	chrIV	1365072	1365662	-1	35.39	7.55	0.00105246	4.7
YBL031W	SHE1	protein_coding	chrII	161699	162715	1	9.79	28.06	0.00266295	2.9			YPR005C	HAL1	protein_coding	chrXVI	565787	566671	-1	27.01	6.05	0.000581981	4.5
YPL081W	RPS9A	protein_coding	chrXVI	404950	406044	1	58.21	168.6	1.42109e-14	2.9			YDR406W	PDR15	protein_coding	chrIV	1279210	1283799	1	27.12	6.02	3.44169e-15	4.5
YDL248W	COS7	protein_coding	chrIV	1802	2953	1	16.43	45.68	6.41953e-05	2.8			YFR008W	FAR7	protein_coding	chrVI	160535	161200	1	23.93	5.36	0.00497502	4.5
YKL190W	CNB1	protein_coding	chrXI	82947	83550	1	14.84	39.87	0.00833131	2.7			YER011W	TIR1	protein_coding	chrV	175248	176012	1	95.04	20.99	1.63463e-09	4.5
YBR296C	PHO89	protein_coding	chrII	796798	798522	-1	33.49	87.89	7.65595e-11	2.6			YGR223C	HSV2	protein_coding	chrVII	940869	942215	-1	37.71	8.61	6.45056e-07	4.4
YER057C	HMF1	protein_coding	chrV	270737	271126	-1	104.71	262.99	2.31606e-07	2.5			YGR251W	NOP19	protein_coding	chrVII	995639	996229	1	38.76	9.05	0.000925804	4.3
YER130C	COM2	protein_coding	chrV	421115	422446	-1	40.38	99.1	8.54138e-09	2.5			YOL067C	RTG1	protein_coding	chrXV	201985	202518	-1	55.95	13.36	0.000177335	4.2
YDR068W	DOS2	protein_coding	chrIV	583713	584645	1	16.01	40.15	0.00180097	2.5			YNL152W	INN1	protein_coding	chrXIV	346313	347542	1	42.92	10.15	5.65385e-07	4.2
YDR288W	NSE3	protein_coding	chrIV	1037195	1038106	1	13.1	32.27	0.00640547	2.5			YOR189W	IES4	protein_coding	chrXV	689624	689974	1	53.91	12.7	0.00270094	4.2
YHR215W	PHO12	protein_coding	chrVIII	552099	553502	1	30.5	75.59	1.94922e-07	2.5			YIL140W	AXL2	protein_coding	chrIX	85366	87837	1	58.82	14.43	3.33067e-16	4.1
YOR026W	BUB3	protein_coding	chrXV	379781	380806	1	11.65	29.56	0.0045834	2.5			YHR071W	PCL5	protein_coding	chrVIII	237004	237693	1	127.02	31.02	1.99424e-10	4.1
YER062C	GPP2	protein_coding	chrV	279930	280682	-1	39.68	95.94	2.59969e-05	2.4			YNL160W	YGP1	protein_coding	chrXIV	336545	337609	1	40.21	10.05	1.06445e-05	4
YAL039C	CYC3	protein_coding	chrI	68716	69525	-1	20.9	49.55	0.00205792	2.4			YPL267W	ACM1	protein_coding	chrXVI	38169	38798	1	28.46	7.08	0.00430566	4
YHR192W	LNP1	protein_coding	chrVIII	486826	487662	1	16.66	40.49	0.00380696	2.4			YIL087C	AIM19	protein_coding	chrIX	199646	200119	-1	79.85	20.7	4.63653e-05	3.9
YGR031W	IMO32	protein_coding	chrVII	546441	547469	1	16.45	39	0.00205792	2.4			YDR309C	GIC2	protein_coding	chrIV	1079048	1080199	-1	142.65	36.39	5.55111e-17	3.9
YGR187C	HGH1	protein_coding	chrVII	870232	871416	-1	23.53	54.19	0.000145878	2.3			YDL204W	RTN2	protein_coding	chrIV	94605	95786	1	17.7	4.53	0.00232047	3.9
YCR097W	HMRA1	protein_coding	chrIII	293835	294321	1	26.59	62.27	0.00804157	2.3			YIR005W	IST3	protein_coding	chrIX	364889	365335	1	37.88	9.98	0.00683714	3.8
YJL194W	CDC6	protein_coding	chrX	69338	70879	1	13.56	30.65	0.00136359	2.3			YDR532C	KRE28	protein_coding	chrIV	1499396	1500553	-1	17.2	4.62	0.00365341	3.7
YJL117W	PHO86	protein_coding	chrX	192531	193466	1	119.18	269.66	1.28342e-13	2.3			YJR094C	IME1	protein_coding	chrX	604569	605651	-1	18.39	4.94	0.00365341	3.7
YBR006W	UGA2	protein_coding	chrII	247010	248503	1	12	28.06	0.00186131	2.3			YLR327C	TMA10	protein_coding	chrXII	783127	783387	-1	76.32	20.5	0.00365341	3.7
YMR115W	MGR3	protein_coding	chrXIII	497704	499209	1	13.89	32.57	0.000737963	2.3			YPL013C	MRPS16	protein_coding	chrXVI	528985	529350	-1	62.59	17.06	0.00196347	3.7
YKR024C	DBP7	protein_coding	chrXI	485144	487372	-1	20.11	44.81	4.36109e-06	2.2			YDR384C	ATO3	protein_coding	chrIV	1241204	1242031	-1	127.5	36.62	9.51071e-11	3.5
YJL012C	VTC4	protein_coding	chrX	411234	413399	-1	201.4	442.23	5.55111e-17	2.2			YAL015C	NTG1	protein_coding	chrI	126903	128102	-1	25.73	7.43	0.000481003	3.5
YJR048W	CYC1	protein_coding	chrX	526335	526664	1	60.36	132.43	0.00277459	2.2			YHR084W	STE12	protein_coding	chrVIII	274174	276240	1	57.82	16.4	4.09006e-12	3.5
YLL027W	ISA1	protein_coding	chrXII	87403	88155	1	31.74	69.88	0.000988287	2.2			YMR035W	IMP2	protein_coding	chrXIII	341142	341675	1	41.03	11.69	0.0030585	3.5
YOR222W	ODC2	protein_coding	chrXV	758330	759253	1	39.88	87.84	4.26661e-05	2.2			YGR161C	RTS3	protein_coding	chrVII	808629	809420	-1	83	24.77	5.54513e-07	3.4
YLR051C	FCF2	protein_coding	chrXII	246324	246977	-1	47.21	96.82	0.000794895	2.1			YGL010W	MPO1	protein_coding	chrVII	475545	476069	1	45.53	13.59	0.00253622	3.4
YLR114C	AVL9	protein_coding	chrXII	374944	377238	-1	7.81	16.32	0.00845661	2.1			YJR019C	TES1	protein_coding	chrX	467232	468281	-1	38.89	11.89	9.85578e-05	3.3
YHR063C	PAN5	protein_coding	chrVIII	224030	225169	-1	67.27	142.39	2.73481e-08	2.1			YNL173C	MDG1	protein_coding	chrXIV	308957	310057	-1	56.09	17.01	1.50797e-06	3.3
YOR375C	GDH1	protein_coding	chrXV	1041678	1043042	-1	387.45	806.27	5.55111e-17	2.1			YNL047C	SLM2	protein_coding	chrXIV	539911	541881	-1	23.75	7.24	2.96177e-05	3.3
YAL044C	GCV3	protein_coding	chrI	57950	58462	-1	100.96	208.62	1.0937e-05	2.1			YNL192W	CHS1	protein_coding	chrXIV	276502	279897	1	119.66	36.5	5.55111e-17	3.3
YKR025W	RPC37	protein_coding	chrXI	487770	488618	1	21.12	45.17	0.00630298	2.1			YKL159C	RCN1	protein_coding	chrXI	153816	154451	-1	40.72	12.62	0.00208864	3.2
YBL068W	PRS4	protein_coding	chrII	92414	93394	1	53.81	112.73	5.68562e-06	2.1			YHL040C	ARN1	protein_coding	chrVIII	19088	20971	-1	71.9	22.25	1.85929e-12	3.2
YNL281W	HCH1	protein_coding	chrXIV	108467	108928	1	198.33	411.19	4.10084e-09	2.1			YNL305C	BXI1	protein_coding	chrXIV	58898	59791	-1	61.27	18.95	7.43259e-06	3.2
YNL072W	RNH201	protein_coding	chrXIV	490317	491240	1	21.56	44.4	0.00667141	2.1			YNL158W	PGA1	protein_coding	chrXIV	339612	340208	1	53.39	16.43	0.000609289	3.2
YPR132W	RPS23B	protein_coding	chrXVI	794965	795767	1	246.82	525.35	5.55111e-17	2.1			YPL269W	KAR9	protein_coding	chrXVI	33013	34947	1	20.59	6.45	0.000148869	3.2
YGL181W	GTS1	protein_coding	chrVII	157906	159096	1	16.73	35.2	0.00500115	2.1			YOL058W	ARG1	protein_coding	chrXV	219211	220473	1	22.87	7.06	0.00112562	3.2
YDR117C	TMA64	protein_coding	chrIV	683946	685643	-1	21.7	42.54	0.000674015	2			YGL248W	PDE1	protein_coding	chrVII	35653	36762	1	30.51	9.64	0.000501335	3.2
YBL087C	RPL23A	protein_coding	chrII	59822	60739	-1	189.87	380.84	1.52101e-14	2			YGR014W	MSB2	protein_coding	chrVII	516943	520863	1	170.44	52.77	5.55111e-17	3.2
YOL064C	MET22	protein_coding	chrXV	206103	207176	-1	66.77	132.87	1.14672e-06	2			YLR040C	AFB1	protein_coding	chrXII	228908	229582	-1	32.46	10.57	0.00595579	3.1
YGR286C	BIO2	protein_coding	chrVII	1063813	1064940	-1	38.85	75.9	0.000227571	2			YKL002W	DID4	protein_coding	chrXI	437778	438544	1	32.46	10.47	0.00318296	3.1
YBR203W	COS111	protein_coding	chrII	629168	631942	1	7.9	15.43	0.00914511	2			YOL032W	OPI10	protein_coding	chrXV	265429	266169	1	29.57	9.63	0.00595579	3.1
YOL010W	RCL1	protein_coding	chrXV	307938	309041	1	55.03	111.48	3.98214e-06	2			YOR113W	AZF1	protein_coding	chrXV	534075	536819	1	38.82	12.35	7.68865e-10	3.1
YGR134W	CAF130	protein_coding	chrVII	757770	761138	1	12.12	24.35	0.000190866	2			YDR200C	VPS64	protein_coding	chrIV	854279	856093	-1	25.24	8.35	8.2286e-05	3
YDR447C	RPS17B	protein_coding	chrIV	1354829	1355553	-1	380.53	719.64	5.55111e-17	1.9			YJL093C	TOK1	protein_coding	chrX	254737	256812	-1	32.62	10.74	1.56376e-06	3
YHR069C	RRP4	protein_coding	chrVIII	233579	234658	-1	42.42	79.28	0.000494102	1.9			YBR132C	AGP2	protein_coding	chrII	499652	501442	-1	53.39	17.93	1.73226e-08	3
YER055C	HIS1	protein_coding	chrV	264892	265785	-1	367.64	686.36	5.55111e-17	1.9			YOL158C	ENB1	protein_coding	chrXV	19491	21311	-1	129.08	42.61	5.55111e-17	3
YMR098C	ATP25	protein_coding	chrXIII	460771	462609	-1	13	24.73	0.00932876	1.9			YCR079W	PTC6	protein_coding	chrIII	252845	254173	1	33.72	11.41	0.000122409	3
YPR156C	TPO3	protein_coding	chrXVI	837909	839777	-1	38.9	74.44	4.66043e-06	1.9			YJL184W	GON7	protein_coding	chrX	83448	83819	1	85.68	28.77	0.00113626	3
YGR233C	PHO81	protein_coding	chrVII	954674	958210	-1	40.27	77.66	8.10597e-11	1.9			YMR173W	DDR48	protein_coding	chrXIII	608689	609981	1	185.64	62.77	5.55111e-17	3
YGR295C	COS6	protein_coding	chrVII	1081584	1082729	-1	92.99	179	2.12227e-08	1.9			YPR185W	ATG13	protein_coding	chrXVI	907218	909434	1	17.97	6.03	0.000274181	3
YKL006W	RPL14A	protein_coding	chrXI	431906	432720	1	306.74	571.23	6.66134e-16	1.9			YLR136C	TIS11	protein_coding	chrXII	415801	416658	-1	26.7	9.36	0.00727784	2.9
YHR216W	IMD2	protein_coding	chrVIII	554396	555967	1	97.57	182.69	1.58878e-10	1.9			YLR242C	ARV1	protein_coding	chrXII	622918	623883	-1	23.71	8.31	0.00727784	2.9
YER072W	VTC1	protein_coding	chrV	302806	303195	1	462.24	871.29	2.22777e-12	1.9			YMR156C	TPP1	protein_coding	chrXIII	570300	571016	-1	29.17	9.95	0.0090531	2.9
YMR136W	GAT2	protein_coding	chrXIII	541199	542881	1	28.41	52.99	0.000388781	1.9			YKR091W	SRL3	protein_coding	chrXI	611525	612265	1	63.17	21.66	9.97004e-05	2.9
YKL166C	TPK3	protein_coding	chrXI	134509	135705	-1	27.46	48.43	0.00821526	1.8			YLR246W	ERF2	protein_coding	chrXII	627118	628197	1	21.21	7.43	0.00727784	2.9
YDL048C	STP4	protein_coding	chrIV	366739	368211	-1	95.34	171.35	1.43905e-08	1.8			YHR152W	SPO12	protein_coding	chrVIII	401434	401955	1	68.69	23.92	0.000747314	2.9
YCL064C	CHA1	protein_coding	chrIII	15798	16880	-1	172.89	303.88	3.7426e-10	1.8			YOR106W	VAM3	protein_coding	chrXV	519121	519972	1	45.59	15.7	0.00040796	2.9
YJL078C	PRY3	protein_coding	chrX	291336	293981	-1	48.56	88.65	2.3147e-08	1.8			YGL053W	PRM8	protein_coding	chrVII	402589	403302	1	29.29	9.99	0.0090531	2.9
YBR154C	RPB5	protein_coding	chrII	548362	549009	-1	116.81	207.83	4.49613e-05	1.8			YKR085C	MRPL20	protein_coding	chrXI	599094	599681	-1	50.82	18.2	0.00252957	2.8
YOL143C	RIB4	protein_coding	chrXV	54595	55104	-1	277.31	496.65	1.60585e-08	1.8			YDL234C	GYP7	protein_coding	chrIV	34237	36477	-1	79.11	28.65	2.90323e-13	2.8
YGR002C	SWC4	protein_coding	chrVII	498476	499906	-1	22.27	41.13	0.00446293	1.8			YHL047C	ARN2	protein_coding	chrVIII	8351	10213	-1	53.46	19.15	3.52082e-08	2.8
YGR024C	THG1	protein_coding	chrVII	531883	532596	-1	50.22	89.94	0.00444462	1.8			YML128C	MSC1	protein_coding	chrXIII	15135	16676	-1	40.69	14.46	1.08226e-05	2.8
YGR172C	YIP1	protein_coding	chrVII	842845	843591	-1	38.67	70.44	0.00833105	1.8			YKR013W	PRY2	protein_coding	chrXI	463959	464948	1	361.17	127.02	5.55111e-17	2.8
YDR322W	MRPL35	protein_coding	chrIV	1110589	1111692	1	32.48	58.17	0.00444462	1.8			YDR393W	SHE9	protein_coding	chrIV	1259901	1261271	1	23.97	8.46	0.00137271	2.8
YHR162W	MPC2	protein_coding	chrVIII	423072	423461	1	188.98	331.59	8.96718e-05	1.8			YCL055W	KAR4	protein_coding	chrIII	27929	28936	1	27.67	9.73	0.00314302	2.8
YMR230W	RPS10B	protein_coding	chrXIII	732414	733141	1	247.63	433.68	1.04108e-09	1.8			YHR154W	RTT107	protein_coding	chrVIII	402966	406178	1	32.86	11.66	1.10806e-08	2.8
YPR137W	RRP9	protein_coding	chrXVI	802359	804080	1	42.8	77.69	2.84849e-05	1.8			YNL129W	NRK1	protein_coding	chrXIV	381480	382202	1	45.46	16.04	0.00137271	2.8
YDR111C	ALT2	protein_coding	chrIV	678241	679764	-1	26.14	45.65	0.00434622	1.7			YNL078W	NIS1	protein_coding	chrXIV	479768	480991	1	61.03	21.86	1.7998e-06	2.8
YJR145C	RPS4A	protein_coding	chrX	702027	703068	-1	1256.92	2079.03	5.55111e-17	1.7			YOR073W	SGO1	protein_coding	chrXV	464771	466543	1	30.9	11.07	4.33602e-05	2.8
YFL034C-A	RPL22B	protein_coding	chrVI	64243	64932	-1	76.5	133.13	0.00111312	1.7			YJR083C	ACF4	protein_coding	chrX	582608	583537	-1	31.06	11.51	0.003746	2.7
YNR067C	DSE4	protein_coding	chrXIV	755746	759099	-1	125.91	213.79	5.55111e-17	1.7			YKR058W	GLG1	protein_coding	chrXI	552770	554620	1	26.9	10.12	0.000166483	2.7
YOR216C	RUD3	protein_coding	chrXV	747525	748979	-1	27.38	46.59	0.00687384	1.7			YDL161W	ENT1	protein_coding	chrIV	167714	169078	1	53.26	19.6	3.80093e-06	2.7
YGL147C	RPL9A	protein_coding	chrVII	227754	228329	-1	1938.35	3236.12	5.55111e-17	1.7			YHR110W	ERP5	protein_coding	chrVIII	332282	332920	1	74.82	27.91	0.000206697	2.7
YGL076C	RPL7A	protein_coding	chrVII	364335	365996	-1	370.94	621.95	5.55111e-17	1.7			YBR214W	SDS24	protein_coding	chrII	651415	652998	1	60.36	21.96	9.09709e-08	2.7
YKL216W	URA1	protein_coding	chrXI	25215	26159	1	528.03	906.97	5.55111e-17	1.7			YMR250W	GAD1	protein_coding	chrXIII	770801	772558	1	23.23	8.62	0.000578094	2.7
YHR066W	SSF1	protein_coding	chrVIII	229335	230696	1	48.99	82.51	0.000620448	1.7			YIL117C	PRM5	protein_coding	chrIX	140613	141569	-1	122.81	47.53	1.51013e-08	2.6
YHR137W	ARO9	protein_coding	chrVIII	375709	377250	1	76.86	130.71	3.19836e-06	1.7			YGR279C	SCW4	protein_coding	chrVII	1048798	1049958	-1	1301.38	501.63	5.55111e-17	2.6
YFL004W	VTC2	protein_coding	chrVI	131810	134296	1	101.32	174.64	2.84917e-12	1.7			YDR358W	GGA1	protein_coding	chrIV	1190059	1191732	1	24.99	9.59	0.000676595	2.6
YER001W	MNN1	protein_coding	chrV	153520	155808	1	52.21	90	1.5013e-06	1.7			YJR148W	BAT2	protein_coding	chrX	705744	706874	1	208.71	80.43	8.88178e-16	2.6
YBR030W	RKM3	protein_coding	chrII	298292	299950	1	26.42	45.16	0.00419112	1.7			YBR145W	ADH5	protein_coding	chrII	533762	534817	1	37.73	14.36	0.000843725	2.6
YMR241W	YHM2	protein_coding	chrXIII	751961	752905	1	151.77	253.88	7.59458e-07	1.7			YBR161W	CSH1	protein_coding	chrII	561634	562764	1	34.34	13.41	0.00122599	2.6
YDR529C	QCR7	protein_coding	chrIV	1496165	1496548	-1	163.4	269.42	0.00153076	1.6			YOR247W	SRL1	protein_coding	chrXV	797676	798308	1	849.65	329.7	5.55111e-17	2.6
YBL014C	RRN6	protein_coding	chrII	199064	201748	-1	21.51	34.21	0.0051565	1.6			YGL134W	PCL10	protein_coding	chrVII	255663	256964	1	25.24	9.59	0.0023975	2.6
YML026C	RPS18B	protein_coding	chrXIII	222987	223828	-1	612.73	1006.26	5.55111e-17	1.6			YGR070W	ROM1	protein_coding	chrVII	627806	631273	1	22.11	8.49	4.1821e-06	2.6
YML006C	GIS4	protein_coding	chrXIII	256092	258416	-1	21.85	35.67	0.00527655	1.6			YJR017C	ESS1	protein_coding	chrX	466521	467033	-1	122.31	48.68	5.2075e-05	2.5
YDR450W	RPS18A	protein_coding	chrIV	1359923	1360798	1	509.36	828.74	2.22045e-16	1.6			YJR043C	POL32	protein_coding	chrX	516461	517513	-1	46.35	18.63	0.00040142	2.5
YLR438W	CAR2	protein_coding	chrXII	1012501	1013775	1	99.21	153.89	9.82743e-05	1.6			YLR099C	ICT1	protein_coding	chrXII	339744	340928	-1	95.82	38.38	6.1614e-08	2.5
YNL178W	RPS3	protein_coding	chrXIV	302680	303402	1	2936.96	4727.02	5.55111e-17	1.6			YHL021C	AIM17	protein_coding	chrVIII	64462	65859	-1	108.29	44.02	6.5233e-10	2.5
YGR034W	RPL26B	protein_coding	chrVII	555812	556672	1	458.08	755.14	1.9984e-15	1.6			YEL064C	AVT2	protein_coding	chrV	29797	31239	-1	21.4	8.65	0.0050854	2.5
YKL215C	OXP1	protein_coding	chrXI	26827	30687	-1	19.09	28.18	0.00911579	1.5			YPL256C	CLN2	protein_coding	chrXVI	64977	66614	-1	113.1	45.19	4.21618e-12	2.5
YDR422C	SIP1	protein_coding	chrIV	1315326	1317773	-1	34.58	51.01	0.00531605	1.5			YKL171W	NNK1	protein_coding	chrXI	127475	130261	1	20.73	8.32	0.000115541	2.5
YDR454C	GUK1	protein_coding	chrIV	1366264	1366827	-1	340.82	504.44	2.22181e-05	1.5			YDR489W	SLD5	protein_coding	chrIV	1431012	1431896	1	30.39	12.09	0.00807774	2.5
YDR481C	PHO8	protein_coding	chrIV	1418550	1420250	-1	94.86	138.42	0.000189053	1.5			YJR106W	ECM27	protein_coding	chrX	624838	627015	1	27.44	11.06	9.26596e-05	2.5
YCR072C	RSA4	protein_coding	chrIII	240805	242352	-1	57.91	85.27	0.00430029	1.5			YNL246W	VPS75	protein_coding	chrXIV	185460	186349	1	36.93	15.03	0.00403882	2.5
YJL069C	UTP18	protein_coding	chrX	310922	312706	-1	48.54	72.95	0.0029922	1.5			YPR009W	SUT2	protein_coding	chrXVI	576552	577358	1	49.37	19.89	0.00141425	2.5
YLL045C	RPL8B	protein_coding	chrXII	47859	48629	-1	2565.52	3884.42	5.55111e-17	1.5			YGL227W	VID30	protein_coding	chrVII	69671	72547	1	21.46	8.68	7.43172e-05	2.5
YLR304C	ACO1	protein_coding	chrXII	735212	737548	-1	321.76	472.08	2.22045e-16	1.5			YIL017C	VID28	protein_coding	chrIX	318200	320965	-1	23.41	9.67	6.7859e-05	2.4
YLR325C	RPL38	protein_coding	chrXII	781143	781379	-1	1941.53	2848.71	1.51912e-10	1.5			YDL197C	ASF2	protein_coding	chrIV	104917	106494	-1	35.98	14.69	0.000164802	2.4
YEL054C	RPL12A	protein_coding	chrV	52721	53218	-1	2127.95	3091.09	5.55111e-17	1.5			YDR357C	CNL1	protein_coding	chrIV	1189199	1189567	-1	75.58	31.42	0.00928481	2.4
YEL037C	RAD23	protein_coding	chrV	81407	82603	-1	94.86	138.59	0.0016753	1.5			YLR006C	SSK1	protein_coding	chrXII	161755	163893	-1	44.23	18.35	1.57351e-06	2.4
YBR017C	KAP104	protein_coding	chrII	270947	273703	-1	94.29	142.98	1.38232e-07	1.5			YLR442C	SIR3	protein_coding	chrXII	1019315	1022251	-1	21.03	8.81	0.000119918	2.4
YBR181C	RPS6B	protein_coding	chrII	591712	592774	-1	607.14	911.16	6.66134e-16	1.5			YPL103C	FMP30	protein_coding	chrXVI	358000	359406	-1	26.19	10.78	0.00255212	2.4
YNL301C	RPL18B	protein_coding	chrXIV	63570	64562	-1	205.61	300.88	2.30548e-05	1.5			YPL064C	CWC27	protein_coding	chrXVI	428711	429616	-1	43.97	18.7	0.00230432	2.4
YML073C	RPL6A	protein_coding	chrXIII	123227	124172	-1	564.32	818.33	2.5997e-11	1.5			YKL142W	MRP8	protein_coding	chrXI	178515	179174	1	113.18	47.3	2.24717e-05	2.4
YMR145C	NDE1	protein_coding	chrXIII	554793	556475	-1	227.25	334.38	3.96867e-09	1.5			YKL051W	SFK1	protein_coding	chrXI	341312	342373	1	122.86	50.39	1.25463e-08	2.4
YPL240C	HSP82	protein_coding	chrXVI	96496	98625	-1	126.72	186.75	6.84445e-07	1.5			YKR042W	UTH1	protein_coding	chrXI	519527	520624	1	1024.1	426.44	5.55111e-17	2.4
YPL078C	ATP4	protein_coding	chrXVI	408010	408744	-1	127.38	192.93	0.00162492	1.5			YDL230W	PTP1	protein_coding	chrIV	42700	43707	1	27.67	11.5	0.00928481	2.4
YPL026C	SKS1	protein_coding	chrXVI	500675	502183	-1	46.2	69.15	0.00843838	1.5			YDR229W	IVY1	protein_coding	chrIV	924785	926146	1	35.1	14.41	0.00057413	2.4
YPL009C	TAE2	protein_coding	chrXVI	535820	538936	-1	29.4	42.92	0.00484257	1.5			YEL011W	GLC3	protein_coding	chrV	133120	135234	1	60.75	25.3	2.47369e-08	2.4
YOR020C	HSP10	protein_coding	chrXV	370524	370844	-1	254.42	372.31	0.00742375	1.5			YOR172W	YRM1	protein_coding	chrXV	654210	656570	1	22.78	9.44	0.00029295	2.4
YOR171C	LCB4	protein_coding	chrXV	652010	653884	-1	57.37	85.62	0.0011686	1.5			YGL153W	PEX14	protein_coding	chrVII	216273	217298	1	29.12	12.17	0.00734348	2.4
YOR259C	RPT4	protein_coding	chrXV	812395	813708	-1	83.38	121.49	0.00218816	1.5			YGR113W	DAM1	protein_coding	chrVII	718893	719924	1	39.57	16.42	0.00161633	2.4
YGR027C	RPS25A	protein_coding	chrVII	534132	534458	-1	1425.44	2168.3	1.15197e-12	1.5			YDL224C	WHI4	protein_coding	chrIV	54397	56346	-1	56.18	24.7	9.35526e-07	2.3
YGR085C	RPL11B	protein_coding	chrVII	648383	648907	-1	921.99	1352.24	5.37906e-11	1.5			YLR120C	YPS1	protein_coding	chrXII	386511	388220	-1	289.47	125.7	5.55111e-17	2.3
YGR209C	TRX2	protein_coding	chrVII	912913	913227	-1	328.83	489.82	0.0015296	1.5			YHR207C	SET5	protein_coding	chrVIII	514905	516485	-1	30.24	12.97	0.000923564	2.3
YKL120W	OAC1	protein_coding	chrXI	217344	218318	1	183.87	278.08	1.40439e-05	1.5			YFR041C	ERJ5	protein_coding	chrVI	237368	238255	-1	48.23	21.09	0.00206009	2.3
YIL110W	HPM1	protein_coding	chrIX	156045	157178	1	65.87	99.88	0.00475696	1.5			YBR193C	MED8	protein_coding	chrII	609082	609753	-1	48.91	21.23	0.00657652	2.3
YIR037W	HYR1	protein_coding	chrIX	423128	423619	1	131.58	203.03	0.0059748	1.5			YNL291C	MID1	protein_coding	chrXIV	84169	85815	-1	47.77	20.58	2.28259e-05	2.3
YDL191W	RPL35A	protein_coding	chrIV	117664	118517	1	465.33	676.73	6.58775e-09	1.5			YNL125C	ESBP6	protein_coding	chrXIV	390146	392167	-1	38.91	16.76	2.28259e-05	2.3
YDR025W	RPS11A	protein_coding	chrIV	491515	492324	1	629.56	916.09	4.62695e-11	1.5			YMR305C	SCW10	protein_coding	chrXIII	879063	880232	-1	946.6	419.25	5.55111e-17	2.3
YLR301W	HRI1	protein_coding	chrXII	730825	731559	1	158.54	237.83	0.00061197	1.5			YGL222C	EDC1	protein_coding	chrVII	80659	81186	-1	62.25	27.03	0.00657652	2.3
YLR344W	RPL26A	protein_coding	chrXII	819312	820142	1	478.21	714.78	3.71466e-10	1.5			YDR268W	MSW1	protein_coding	chrIV	1004004	1005143	1	27.08	11.74	0.00832	2.3
YLR386W	VAC14	protein_coding	chrXII	893628	896270	1	26.38	40.49	0.00486346	1.5			YCR068W	ATG15	protein_coding	chrIII	237214	238776	1	40.14	17.69	0.000212501	2.3
YHL001W	RPL14B	protein_coding	chrVIII	104277	105091	1	153.98	228.71	0.0005384	1.5			YHR088W	RPF1	protein_coding	chrVIII	281495	282382	1	72.9	31.14	0.000108222	2.3
YHR032W	ERC1	protein_coding	chrVIII	173344	175089	1	41.64	64.36	0.00343253	1.5			YNR059W	MNT4	protein_coding	chrXIV	736803	738545	1	31.43	13.82	0.00052401	2.3
YEL051W	VMA8	protein_coding	chrV	58378	59148	1	237.69	358.6	1.2838e-05	1.5			YMR291W	TDA1	protein_coding	chrXIII	852630	854390	1	137.43	60.77	4.18665e-13	2.3
YER117W	RPL23B	protein_coding	chrV	396769	397653	1	294.85	444.42	2.06815e-07	1.5			YGR032W	GSC2	protein_coding	chrVII	548264	553951	1	28.54	12.39	1.52371e-09	2.3
YBR189W	RPS9B	protein_coding	chrII	604508	605508	1	1237.76	1814.03	5.55111e-17	1.5			YGR040W	KSS1	protein_coding	chrVII	575398	576504	1	71.08	31.42	3.55467e-05	2.3
YNL162W	RPL42A	protein_coding	chrXIV	331322	332154	1	616.96	911.14	5.47495e-12	1.5			YKL103C	APE1	protein_coding	chrXI	246138	247682	-1	57.37	26.55	2.7253e-05	2.2
YML063W	RPS1B	protein_coding	chrXIII	146482	147249	1	2557.38	3861.27	5.55111e-17	1.5			YDL231C	BRE4	protein_coding	chrIV	38867	42244	-1	40.98	19.01	1.68386e-07	2.2
YPL111W	CAR1	protein_coding	chrXVI	339944	340945	1	88.47	129.95	0.004804	1.5			YJL155C	FBP26	protein_coding	chrX	129285	130643	-1	36.64	16.41	0.00115569	2.2
YOR108W	LEU9	protein_coding	chrXV	523027	524841	1	122.37	180.83	5.65452e-06	1.5			YJL094C	KHA1	protein_coding	chrX	251821	254442	-1	64.2	28.91	2.84616e-09	2.2
YAL003W	EFB1	protein_coding	chrI	142174	143160	1	1163.49	1769.28	5.55111e-17	1.5			YHR115C	DMA1	protein_coding	chrVIII	340109	341359	-1	73.25	32.79	1.04346e-05	2.2
YGL103W	RPL28	protein_coding	chrVII	310967	311927	1	602.15	905.79	1.44329e-14	1.5			YNL229C	URE2	protein_coding	chrXIV	219137	220201	-1	57.98	25.96	0.000296206	2.2
YGL030W	RPL30	protein_coding	chrVII	439091	439638	1	627.03	971.61	1.53156e-10	1.5			YMR031C	EIS1	protein_coding	chrXIII	332212	334743	-1	44.45	20.08	1.27532e-06	2.2
YGR214W	RPS0A	protein_coding	chrVII	920575	921788	1	723.6	1114.47	5.55111e-17	1.5			YPL172C	COX10	protein_coding	chrXVI	224353	225741	-1	30.83	14.13	0.00321712	2.2
YKL010C	UFD4	protein_coding	chrXI	421424	425875	-1	27.07	37.86	0.00456777	1.4			YOR275C	RIM20	protein_coding	chrXV	839084	841069	-1	39.62	18.41	8.28664e-05	2.2
YDL184C	RPL41A	protein_coding	chrIV	130407	130484	-1	2847.48	3990.53	0.000106988	1.4			YIL010W	DOT5	protein_coding	chrIX	334882	335529	1	64.55	28.9	0.00289849	2.2
YDR120C	TRM1	protein_coding	chrIV	691549	693261	-1	73.84	99.96	0.00925207	1.4			YDL240W	LRG1	protein_coding	chrIV	22823	25876	1	40.44	18.4	4.70315e-07	2.2
YDR224C	HTB1	protein_coding	chrIV	914317	914712	-1	955.74	1351.31	1.98333e-07	1.4			YDR128W	MTC5	protein_coding	chrIV	709549	712995	1	33.52	15.52	1.70224e-06	2.2
YCR031C	RPS14A	protein_coding	chrIII	177500	178220	-1	1414.54	1939.59	1.12133e-14	1.4			YDR171W	HSP42	protein_coding	chrIV	806621	807748	1	78.58	36.37	2.7253e-05	2.2
YJL200C	ACO2	protein_coding	chrX	56444	58813	-1	68.08	93.7	0.00185696	1.4			YDR296W	MHR1	protein_coding	chrIV	1055212	1055892	1	57.04	26.19	0.00512191	2.2
YJL151C	SNA3	protein_coding	chrX	136372	136773	-1	235.37	337.22	0.00676231	1.4			YFR055W	IRC7	protein_coding	chrVI	264204	265226	1	60.36	27.9	0.000453919	2.2
YHL033C	RPL8A	protein_coding	chrVIII	35255	36025	-1	1074.78	1488.76	5.81646e-13	1.4			YER112W	LSM4	protein_coding	chrV	387232	387795	1	134.21	60.09	6.16591e-05	2.2
YER114C	BOI2	protein_coding	chrV	390590	393712	-1	40.5	55.97	0.00521597	1.4			YPL076W	GPI2	protein_coding	chrXVI	410443	411285	1	40.17	17.99	0.00736916	2.2
YBL072C	RPS8A	protein_coding	chrII	88523	89125	-1	1057.09	1499.76	8.98071e-12	1.4			YOR220W	RCN2	protein_coding	chrXV	755328	756125	1	159.76	73.76	4.57343e-07	2.2
YBR025C	OLA1	protein_coding	chrII	290681	291865	-1	817.79	1104.86	8.5576e-13	1.4			YKL005C	BYE1	protein_coding	chrXI	433093	434877	-1	23.99	11.49	0.00490798	2.1
YNL313C	EMW1	protein_coding	chrXIV	45308	48022	-1	69.7	94.61	0.00131376	1.4			YLR361C	DCR2	protein_coding	chrXII	847388	849124	-1	28.67	13.35	0.001778	2.1
YNL248C	RPA49	protein_coding	chrXIV	181361	182608	-1	180.36	257.98	3.2335e-05	1.4			YHL035C	VMR1	protein_coding	chrVIII	27978	32756	-1	28.76	13.81	5.01712e-07	2.1
YNL182C	IPI3	protein_coding	chrXIV	295960	297627	-1	77.62	108.01	0.00384891	1.4			YHR091C	MSR1	protein_coding	chrVIII	284839	286770	-1	23.71	11.54	0.0042484	2.1
YNL064C	YDJ1	protein_coding	chrXIV	505868	507097	-1	408.11	551.8	2.44704e-07	1.4			YFR015C	GSY1	protein_coding	chrVI	174265	176391	-1	56.19	26.42	1.63989e-06	2.1
YNL037C	IDH1	protein_coding	chrXIV	557920	559002	-1	180.25	245.41	0.000973178	1.4			YFR053C	HXK1	protein_coding	chrVI	253592	255049	-1	127.06	60.56	4.06382e-09	2.1
YNR053C	NOG2	protein_coding	chrXIV	721120	723112	-1	173.41	244.78	7.63089e-07	1.4			YBR067C	TIP1	protein_coding	chrII	372103	372735	-1	1244.58	605.85	5.55111e-17	2.1
YPL090C	RPS6A	protein_coding	chrXVI	377291	378395	-1	499.34	708.65	2.11411e-10	1.4			YBR162C	TOS1	protein_coding	chrII	563203	564570	-1	630.49	299.24	5.55111e-17	2.1
YOL120C	RPL18A	protein_coding	chrXV	93395	94402	-1	1008.82	1440.44	5.55111e-17	1.4			YMR078C	CTF18	protein_coding	chrXIII	422503	424728	-1	21.48	10.02	0.00223699	2.1
YOL097C	WRS1	protein_coding	chrXV	136527	137825	-1	207.78	280.81	0.000157599	1.4			YPL163C	SVS1	protein_coding	chrXVI	241918	242700	-1	178.08	84.29	2.73818e-07	2.1
YOR234C	RPL33B	protein_coding	chrXV	778555	779405	-1	276.21	393.01	2.91669e-05	1.4			YOR008C	SLG1	protein_coding	chrXV	341278	342414	-1	198.85	94.13	5.94901e-11	2.1
YOR369C	RPS12	protein_coding	chrXV	1028194	1028625	-1	3276.12	4711.21	5.55111e-17	1.4			YOR060C	SLD7	protein_coding	chrXV	440390	441163	-1	46.32	21.89	0.00902988	2.1
YGL078C	DBP3	protein_coding	chrVII	360288	361859	-1	146.36	202.54	0.000153846	1.4			YAL014C	SYN8	protein_coding	chrI	128252	129019	-1	76.51	37.16	0.00117318	2.1
YGL001C	ERG26	protein_coding	chrVII	495453	496502	-1	116.67	167.33	0.00199379	1.4			YGR171C	MSM1	protein_coding	chrVII	840824	842551	-1	25.36	11.87	0.00354891	2.1
YGR132C	PHB1	protein_coding	chrVII	755589	756452	-1	125.65	180.64	0.00337756	1.4			YKL096W	CWP1	protein_coding	chrXI	261132	261851	1	377.64	182.09	1.96787e-12	2.1
YKL085W	MDH1	protein_coding	chrXI	279123	280127	1	98.11	140.21	0.00607538	1.4			YKR021W	ALY1	protein_coding	chrXI	479234	481981	1	32.98	15.9	4.85158e-05	2.1
YKR057W	RPS21A	protein_coding	chrXI	551657	552242	1	270.24	371.36	0.00216417	1.4			YDR003W	RCR2	protein_coding	chrIV	454122	454754	1	81.82	39.45	0.00213282	2.1
YIL018W	RPL2B	protein_coding	chrIX	316768	317932	1	1905.61	2638.09	5.55111e-17	1.4			YDR121W	DPB4	protein_coding	chrIV	693585	694175	1	67.41	31.69	0.00564944	2.1
YDR064W	RPS13	protein_coding	chrIV	579458	580452	1	888.87	1222.62	3.58158e-13	1.4			YMR032W	HOF1	protein_coding	chrXIII	335298	337307	1	18.83	8.87	0.00713842	2.1
YDR418W	RPL12B	protein_coding	chrIV	1301616	1302113	1	2645.94	3728.65	5.55111e-17	1.4			YMR255W	GFD1	protein_coding	chrXIII	778001	778567	1	80.8	39.32	0.0042484	2.1
YLR048W	RPS0B	protein_coding	chrXII	242232	243349	1	1539.4	2082.89	5.55111e-17	1.4			YOR030W	DFG16	protein_coding	chrXV	386825	388684	1	38.55	18.7	0.00033037	2.1
YLR061W	RPL22A	protein_coding	chrXII	263194	263948	1	592.31	828.08	4.90141e-08	1.4			YGL093W	SPC105	protein_coding	chrVII	334886	337639	1	19.53	9.39	0.00169732	2.1
YLR075W	RPL10	protein_coding	chrXII	282927	283592	1	4149.91	6003.37	5.55111e-17	1.4			YCR037C	PHO87	protein_coding	chrIII	194414	197185	-1	51.02	25.74	1.43377e-06	2
YLR167W	RPS31	protein_coding	chrXII	498947	499405	1	4882.25	6709.41	5.55111e-17	1.4			YLR370C	ARC18	protein_coding	chrXII	861718	862254	-1	133.54	68.09	0.000702389	2
YLR328W	NMA1	protein_coding	chrXII	784913	786118	1	90.84	128.68	0.00489133	1.4			YLR382C	NAM2	protein_coding	chrXII	882067	884751	-1	22.63	11.29	0.00137773	2
YHR010W	RPL27A	protein_coding	chrVIII	126521	127492	1	525.66	734.96	5.45872e-09	1.4			YHL009C	YAP3	protein_coding	chrVIII	84068	85060	-1	42.13	20.66	0.0067513	2
YNL216W	RAP1	protein_coding	chrXIV	241689	244172	1	70.97	100.53	0.000356422	1.4			YFL044C	OTU1	protein_coding	chrVI	44655	45560	-1	73.65	36.42	0.000701693	2
YNR030W	ALG12	protein_coding	chrXIV	678799	680454	1	73.38	105.02	0.0022158	1.4			YFR039C	OSW7	protein_coding	chrVI	232012	233544	-1	33.13	16.87	0.00427777	2
YPL160W	CDC60	protein_coding	chrXVI	246990	250262	1	458.89	637.36	5.55111e-17	1.4			YBR129C	OPY1	protein_coding	chrII	494353	495339	-1	60.55	30.72	0.00186043	2
YPL079W	RPL21B	protein_coding	chrXVI	406636	407539	1	548.67	762.63	1.72527e-08	1.4			YML038C	YMD8	protein_coding	chrXIII	202775	204103	-1	128.15	64.42	1.08653e-07	2
YOR096W	RPS7A	protein_coding	chrXV	505794	506767	1	779.19	1122.62	6.21725e-15	1.4			YMR197C	VTI1	protein_coding	chrXIII	658545	659198	-1	80.71	40.91	0.0034071	2
YGL135W	RPL1B	protein_coding	chrVII	254641	255294	1	1439.14	2038.75	1.11022e-16	1.4			YOL060C	MAM3	protein_coding	chrXV	214017	216137	-1	57.76	29.01	6.51619e-06	2
YGL123W	RPS2	protein_coding	chrVII	277617	278381	1	4405.74	5978.43	5.55111e-17	1.4			YOR137C	SIA1	protein_coding	chrXV	581813	583681	-1	39.43	20.04	0.000562493	2
YGR118W	RPS23A	protein_coding	chrVII	726974	727730	1	422.34	611.47	2.8089e-07	1.4			YOR306C	MCH5	protein_coding	chrXV	889867	891432	-1	45.79	22.78	0.000484836	2
YGR135W	PRE9	protein_coding	chrVII	761392	762168	1	147.41	206.61	0.00538214	1.4			YOR308C	SNU66	protein_coding	chrXV	894624	896387	-1	29.36	14.66	0.00315817	2
YGR211W	ZPR1	protein_coding	chrVII	915241	916701	1	188.83	261.88	2.99727e-05	1.4			YOR324C	FRT1	protein_coding	chrXV	923232	925040	-1	33.03	16.76	0.00186043	2
YGR234W	YHB1	protein_coding	chrVII	959904	961103	1	731.21	1039.03	8.88178e-16	1.4			YOR330C	MIP1	protein_coding	chrXV	939621	943385	-1	31.48	15.63	6.98374e-06	2
YKR094C	RPL40B	protein_coding	chrXI	617996	618750	-1	725.55	958.02	7.79678e-07	1.3			YOR350C	MNE1	protein_coding	chrXV	992864	994855	-1	24.5	12.54	0.0053739	2
YIL069C	RPS24B	protein_coding	chrIX	231553	232369	-1	557.11	716.11	5.30146e-05	1.3			YGL186C	TPN1	protein_coding	chrVII	151037	152776	-1	36.06	18.45	0.00159705	2
YIL052C	RPL34B	protein_coding	chrIX	256226	257063	-1	314.96	400.17	0.00341926	1.3			YDR332W	IRC3	protein_coding	chrIV	1131001	1133070	1	20.69	10.34	0.00732223	2
YDL063C	SYO1	protein_coding	chrIV	338272	340134	-1	97.83	128.3	0.00552054	1.3			YDR356W	SPC110	protein_coding	chrIV	1186107	1188941	1	27.05	13.21	0.000229454	2
YDR324C	UTP4	protein_coding	chrIV	1114433	1116763	-1	73.06	96.8	0.00526384	1.3			YDR492W	IZH1	protein_coding	chrIV	1434924	1435874	1	156.05	79.71	1.1495e-06	2
YDR502C	SAM2	protein_coding	chrIV	1453310	1454464	-1	160.39	215.44	0.00219588	1.3			YLR019W	PSR2	protein_coding	chrXII	180288	181481	1	115.11	56.77	1.06673e-06	2
YJL190C	RPS22A	protein_coding	chrX	74910	75302	-1	3510	4684.01	3.33067e-16	1.3			YLR258W	GSY2	protein_coding	chrXII	660716	662833	1	66.3	33.69	1.90809e-06	2
YJR127C	RSF2	protein_coding	chrX	658917	663059	-1	36.06	48.44	0.00595781	1.3			YLR381W	CTF3	protein_coding	chrXII	879723	881924	1	23.07	11.75	0.00427777	2
YLR029C	RPL15A	protein_coding	chrXII	201976	202590	-1	3993.63	5110.47	5.55111e-17	1.3			YBR005W	RCR1	protein_coding	chrII	245906	246547	1	212.54	104.19	9.87229e-07	2
YLR044C	PDC1	protein_coding	chrXII	232390	234081	-1	7667.62	10016.6	5.55111e-17	1.3			YBR290W	BSD2	protein_coding	chrII	782591	783556	1	45.37	22.16	0.00535332	2
YLR287C-A	RPS30A	protein_coding	chrXII	712537	713158	-1	614.88	791.5	0.000193456	1.3			YOL011W	PLB3	protein_coding	chrXV	305349	307409	1	92.78	45.87	9.54035e-09	2
YLR333C	RPS25B	protein_coding	chrXII	795573	795899	-1	1379.75	1841.01	3.09894e-06	1.3			YOR374W	ALD4	protein_coding	chrXV	1039840	1041399	1	88.74	44.02	1.15097e-06	2
YLR441C	RPS1A	protein_coding	chrXII	1018141	1018908	-1	2515.88	3295.73	5.55111e-17	1.3			YGR046W	TAM41	protein_coding	chrVII	584895	586052	1	48.16	24.65	0.00292107	2
YHR094C	HXT1	protein_coding	chrVIII	290913	292625	-1	184.89	234.29	0.00152965	1.3			YKL020C	SPT23	protein_coding	chrXI	398832	402080	-1	62.23	32.12	2.06273e-08	1.9
YHR203C	RPS4B	protein_coding	chrVIII	504476	505530	-1	1239.54	1672.99	1.11022e-16	1.3			YKR089C	TGL4	protein_coding	chrXI	605633	608365	-1	38.26	19.91	6.53614e-05	1.9
YFR031C-A	RPL2A	protein_coding	chrVI	220507	221418	-1	1537.65	1951.94	1.80259e-11	1.3			YDL028C	MPS1	protein_coding	chrIV	400997	403291	-1	32.55	17.49	0.00121082	1.9
YER056C-A	RPL34A	protein_coding	chrV	269423	270185	-1	353.75	465.22	0.000639008	1.3			YDR069C	DOA4	protein_coding	chrIV	584939	587719	-1	26.86	14.11	0.000859893	1.9
YBL003C	HTA2	protein_coding	chrII	235394	235792	-1	426.85	574.46	0.00310602	1.3			YDR105C	TMS1	protein_coding	chrIV	665349	666770	-1	58.83	30.73	0.000381286	1.9
YBR249C	ARO4	protein_coding	chrII	716882	717994	-1	505.6	653.88	4.01986e-06	1.3			YFL013C	IES1	protein_coding	chrVI	107852	109930	-1	34.97	18.02	0.000753173	1.9
YNL007C	SIS1	protein_coding	chrXIV	618507	619565	-1	177.75	235.81	0.00319554	1.3			YNL258C	DSL1	protein_coding	chrXIV	158109	160373	-1	33.86	18.11	0.000973209	1.9
YML035C	AMD1	protein_coding	chrXIII	206428	208860	-1	65.09	87.24	0.0049564	1.3			YPL184C	MRN1	protein_coding	chrXVI	195950	197788	-1	88.82	47.04	1.078e-06	1.9
YMR242C	RPL20A	protein_coding	chrXIII	753225	754220	-1	1502.97	1903.72	6.12621e-12	1.3			YPL164C	MLH3	protein_coding	chrXVI	239350	241497	-1	20.87	10.8	0.0084961	1.9
YMR260C	TIF11	protein_coding	chrXIII	789378	789839	-1	573.44	721.99	0.00487475	1.3			YPL141C	FRK1	protein_coding	chrXVI	283464	286061	-1	28.75	15.45	0.00121082	1.9
YPR033C	HTS1	protein_coding	chrXVI	637379	639019	-1	203.32	255.98	0.00158402	1.3			YPL007C	TFC8	protein_coding	chrXVI	542082	543848	-1	32.69	17.16	0.003349	1.9
YPR110C	RPC40	protein_coding	chrXVI	745828	746835	-1	389.3	514.95	2.5553e-05	1.3			YOR219C	STE13	protein_coding	chrXV	752214	755009	-1	50.23	27.11	1.03646e-05	1.9
YOL121C	RPS19A	protein_coding	chrXV	92026	92850	-1	415.29	557.82	3.11795e-05	1.3			YAL034C	FUN19	protein_coding	chrI	80710	81951	-1	37.69	20.11	0.0097029	1.9
YOL077C	BRX1	protein_coding	chrXV	185848	186723	-1	234.21	300.34	0.00722105	1.3			YGR005C	TFG2	protein_coding	chrVII	504657	505859	-1	59.61	31.88	0.00142	1.9
YOR310C	NOP58	protein_coding	chrXV	896825	898360	-1	376.09	486	3.22614e-06	1.3			YGR146C	ECL1	protein_coding	chrVII	784223	784858	-1	216.11	116.39	1.20986e-05	1.9
YOR312C	RPL20B	protein_coding	chrXV	900250	901194	-1	1157.23	1513.82	1.68703e-11	1.3			YIL006W	YIA6	protein_coding	chrIX	344062	345183	1	47.93	24.64	0.00366254	1.9
YGL031C	RPL24A	protein_coding	chrVII	437467	437934	-1	1491.84	1993.36	5.47094e-09	1.3			YDR096W	GIS1	protein_coding	chrIV	637139	639823	1	81.61	42.52	8.00218e-09	1.9
YGL009C	LEU1	protein_coding	chrVII	476313	478652	-1	673.78	906.73	5.55111e-17	1.3			YDR232W	HEM1	protein_coding	chrIV	927452	929098	1	345.9	184.65	5.55111e-17	1.9
YKL109W	HAP4	protein_coding	chrXI	232227	233891	1	189.62	241.58	0.00119558	1.3			YDR251W	PAM1	protein_coding	chrIV	960614	963106	1	80.7	43.29	1.02095e-07	1.9
YIL148W	RPL40A	protein_coding	chrIX	68708	69528	1	1333.23	1727.25	9.40041e-11	1.3			YCR069W	CPR4	protein_coding	chrIII	239055	240011	1	138.42	73.62	1.25676e-05	1.9
YDL130W	RPP1B	protein_coding	chrIV	229906	230527	1	795.82	1008.01	7.68054e-05	1.3			YJR054W	KCH1	protein_coding	chrX	536056	537549	1	44.67	23.88	0.00207563	1.9
YDR023W	SES1	protein_coding	chrIV	489508	490896	1	562.88	708.87	1.2869e-06	1.3			YLR332W	MID2	protein_coding	chrXII	790676	791806	1	293.25	157.71	9.74398e-12	1.9
YDR037W	KRS1	protein_coding	chrIV	525440	527215	1	924.2	1172.08	4.46199e-13	1.3			YLR390W-A	CCW14	protein_coding	chrXII	903724	904440	1	836.23	449.04	5.55111e-17	1.9
YJL177W	RPL17B	protein_coding	chrX	90786	91657	1	686.45	885.73	2.47873e-06	1.3			YER067W	RGI1	protein_coding	chrV	292066	292551	1	139.35	75.24	0.00220276	1.9
YJL014W	CCT3	protein_coding	chrX	407558	409162	1	215.33	272.84	0.000935598	1.3			YBL005W	PDR3	protein_coding	chrII	217470	220400	1	37.38	20.08	8.87777e-05	1.9
YJR123W	RPS5	protein_coding	chrX	651901	652578	1	4528.91	6058.91	5.55111e-17	1.3			YNL321W	VNX1	protein_coding	chrXIV	34696	37422	1	67.93	35.32	1.05239e-07	1.9
YLR109W	AHP1	protein_coding	chrXII	368781	369311	1	1888.79	2469.01	1.298e-10	1.3			YNL157W	IGO1	protein_coding	chrXIV	340352	340858	1	145.37	75.64	0.000805687	1.9
YLR410W	VIP1	protein_coding	chrXII	937541	940981	1	78.44	103.68	0.000499295	1.3			YMR011W	HXT2	protein_coding	chrXIII	288079	289704	1	971.48	499.69	5.55111e-17	1.9
YER074W	RPS24A	protein_coding	chrV	306323	307196	1	831.88	1113.3	2.1455e-09	1.3			YMR316W	DIA1	protein_coding	chrXIII	904825	905835	1	118.22	62.63	3.04893e-05	1.9
YER102W	RPS8B	protein_coding	chrV	363100	363702	1	1357.7	1737.88	1.01e-07	1.3			YPL022W	RAD1	protein_coding	chrXVI	506697	509999	1	26.54	13.77	0.00024617	1.9
YBL092W	RPL32	protein_coding	chrII	45978	46370	1	2911.91	3910.15	2.88658e-14	1.3			YPR036W-A	SPO24	protein_coding	chrXVI	645950	646153	1	981.33	524.63	9.6435e-08	1.9
YBL027W	RPL19B	protein_coding	chrII	168423	169376	1	984.49	1311.62	2.2076e-11	1.3			YPR040W	TIP41	protein_coding	chrXVI	647305	648375	1	43.71	22.48	0.00675488	1.9
YBR084W	MIS1	protein_coding	chrII	411054	413981	1	202.73	260.43	4.14754e-06	1.3			YOR346W	REV1	protein_coding	chrXV	981828	984785	1	32.66	17.19	0.00015543	1.9
YBR118W	TEF2	protein_coding	chrII	477671	479047	1	2031.74	2680.78	5.55111e-17	1.3			YAR027W	UIP3	protein_coding	chrI	183770	184477	1	94.25	50.39	0.00207563	1.9
YNL189W	SRP1	protein_coding	chrXIV	284260	285888	1	188.92	252.94	9.58927e-05	1.3			YGR101W	PCP1	protein_coding	chrVII	693363	694403	1	56.45	29.99	0.0035702	1.9
YNL112W	DBP2	protein_coding	chrXIV	413639	416281	1	137.92	179.86	0.000124035	1.3			YGR199W	PMT6	protein_coding	chrVII	897502	899781	1	31.89	17.21	0.00150652	1.9
YNL061W	NOP2	protein_coding	chrXIV	510540	512396	1	131.94	171.46	0.00191788	1.3			YKL046C	DCW1	protein_coding	chrXI	351275	352624	-1	61.23	33.69	0.000982526	1.8
YML022W	APT1	protein_coding	chrXIII	228937	229500	1	301.97	393.75	0.00873238	1.3			YDR169C	STB3	protein_coding	chrIV	792348	793889	-1	37.46	21.4	0.00909397	1.8
YPL237W	SUI3	protein_coding	chrXVI	100496	101353	1	380.75	484.39	0.00105436	1.3			YDR490C	PKH1	protein_coding	chrIV	1431968	1434268	-1	24.67	13.57	0.00626452	1.8
YPL143W	RPL33A	protein_coding	chrXVI	282122	282970	1	568.96	729.04	3.98263e-05	1.3			YDR516C	EMI2	protein_coding	chrIV	1474974	1476476	-1	95.42	52.81	1.66862e-05	1.8
YPL126W	NAN1	protein_coding	chrXVI	310210	312900	1	134.35	171.02	0.000552347	1.3			YJL165C	HAL5	protein_coding	chrX	106894	109461	-1	82.61	45.84	1.82797e-07	1.8
YPL093W	NOG1	protein_coding	chrXVI	370978	372921	1	358.12	478.05	6.51678e-09	1.3			YJR033C	RAV1	protein_coding	chrX	492378	496451	-1	25.18	13.79	0.000220209	1.8
YPR035W	GLN1	protein_coding	chrXVI	642208	643320	1	744.52	937.54	6.2714e-07	1.3			YHR188C	GPI16	protein_coding	chrVIII	482005	483837	-1	103.24	58.39	1.64706e-06	1.8
YPR036W	VMA13	protein_coding	chrXVI	643836	645272	1	263.38	342.6	0.000108208	1.3			YHR199C	AIM46	protein_coding	chrVIII	497490	498422	-1	84.33	46.84	0.00151026	1.8
YPR080W	TEF1	protein_coding	chrXVI	700594	701970	1	1395.96	1800.57	5.55111e-17	1.3			YBL082C	ALG3	protein_coding	chrII	69751	71127	-1	54.97	30.44	0.001778	1.8
YPR145W	ASN1	protein_coding	chrXVI	822620	824338	1	662.83	840.5	1.64561e-09	1.3			YBR092C	PHO3	protein_coding	chrII	427698	429101	-1	266.02	145.47	1.60161e-12	1.8
YOL127W	RPL25	protein_coding	chrXV	80348	81190	1	935.72	1170.11	2.52324e-06	1.3			YMR311C	GLC8	protein_coding	chrXIII	896914	897603	-1	73.62	40.07	0.00873479	1.8
YOR293W	RPS10A	protein_coding	chrXV	867098	867852	1	527.67	682.78	0.000101274	1.3			YPL224C	MMT2	protein_coding	chrXVI	126634	128088	-1	39.7	22.68	0.00909397	1.8
YGR103W	NOP7	protein_coding	chrVII	695417	697234	1	255.84	323.78	0.000134382	1.3			YPR161C	SGV1	protein_coding	chrXVI	864449	866422	-1	56	30.72	0.000129684	1.8
													YOR081C	TGL5	protein_coding	chrXV	476939	479188	-1	52.68	28.94	7.65105e-05	1.8
													YOR161C	PNS1	protein_coding	chrXV	636939	638558	-1	47.34	26.98	0.00255523	1.8
													YGR065C	VHT1	protein_coding	chrVII	618077	619858	-1	36.89	20.52	0.00380931	1.8
													YIL118W	RHO3	protein_coding	chrIX	139752	140447	1	108.76	61.51	0.00243704	1.8
													YDR216W	ADR1	protein_coding	chrIV	895035	899006	1	27.58	15.72	0.000311345	1.8
													YDR244W	PEX5	protein_coding	chrIV	950563	952401	1	34.66	19.4	0.00473534	1.8
													YCL040W	GLK1	protein_coding	chrIII	50838	52340	1	286.93	157.84	5.09592e-14	1.8
													YJL052W	TDH1	protein_coding	chrX	338271	339269	1	291.12	166.05	4.46464e-09	1.8
													YJR046W	TAH11	protein_coding	chrX	522048	523862	1	73.53	39.8	1.84543e-05	1.8
													YLL035W	GRC3	protein_coding	chrXII	68580	70478	1	50.87	27.71	0.000302546	1.8
													YHR017W	YSC83	protein_coding	chrVIII	138694	139851	1	67.95	37.74	0.00151026	1.8
													YER143W	DDI1	protein_coding	chrV	456319	457605	1	55.72	31.18	0.00273688	1.8
													YBL102W	SFT2	protein_coding	chrII	24098	24745	1	92.22	50.92	0.00530633	1.8
													YBL032W	HEK2	protein_coding	chrII	160184	161329	1	173.82	94.95	2.37088e-07	1.8
													YBR158W	AMN1	protein_coding	chrII	556549	558198	1	216.7	118.38	4.42102e-12	1.8
													YBR207W	FTH1	protein_coding	chrII	635146	636543	1	82.64	46.57	0.000166794	1.8
													YNL172W	APC1	protein_coding	chrXIV	310636	315882	1	19.74	10.71	0.000168466	1.8
													YNL073W	MSK1	protein_coding	chrXIV	488386	490116	1	73.07	41.73	0.000112846	1.8
													YML052W	SUR7	protein_coding	chrXIII	170402	171310	1	196.13	108.91	1.77651e-06	1.8
													YOR066W	MSA1	protein_coding	chrXV	449436	451325	1	33.73	18.4	0.00341827	1.8
													YOR208W	PTP2	protein_coding	chrXV	733925	736177	1	56.58	31.67	6.48428e-05	1.8
													YAL060W	BDH1	protein_coding	chrI	35155	36303	1	83.21	45.02	0.000286106	1.8
													YGL255W	ZRT1	protein_coding	chrVII	20978	22108	1	73.97	40.22	0.00074986	1.8
													YGL141W	HUL5	protein_coding	chrVII	238353	241085	1	27.7	15.66	0.00243704	1.8
													YGL126W	SCS3	protein_coding	chrVII	270997	272139	1	49.67	28.09	0.00866574	1.8
													YGL062W	PYC1	protein_coding	chrVII	385196	388732	1	106.72	59.26	3.59079e-12	1.8
													YKR084C	HBS1	protein_coding	chrXI	597055	598890	-1	66.18	38.86	0.000289875	1.7
													YDR443C	SSN2	protein_coding	chrIV	1345676	1349938	-1	22.2	13.39	0.00222678	1.7
													YCR005C	CIT2	protein_coding	chrIII	120946	122328	-1	100.1	57.39	5.9294e-05	1.7
													YCR030C	SYP1	protein_coding	chrIII	173826	176438	-1	63.65	38.57	5.7148e-05	1.7
													YLR084C	RAX2	protein_coding	chrXII	296589	300251	-1	72.05	41.64	4.28571e-08	1.7
													YER027C	GAL83	protein_coding	chrV	208979	210232	-1	70.69	42.67	0.00311162	1.7
													YBL067C	UBP13	protein_coding	chrII	93639	95882	-1	78.56	46.1	1.2465e-05	1.7
													YBR004C	GPI18	protein_coding	chrII	244366	245667	-1	123.92	72.61	2.78011e-05	1.7
													YNL197C	WHI3	protein_coding	chrXIV	267608	269593	-1	118.86	68.71	2.24796e-07	1.7
													YNL169C	PSD1	protein_coding	chrXIV	316169	317671	-1	56.33	33.23	0.00267997	1.7
													YNL153C	GIM3	protein_coding	chrXIV	345669	346058	-1	176.21	102.91	0.00597075	1.7
													YML032C	RAD52	protein_coding	chrXIII	212515	213930	-1	52.75	30.86	0.00425861	1.7
													YPL115C	BEM3	protein_coding	chrXVI	332100	335486	-1	46.17	26.6	2.26559e-05	1.7
													YPR042C	PUF2	protein_coding	chrXVI	650435	653662	-1	61.4	36.47	5.54855e-06	1.7
													YPR181C	SEC23	protein_coding	chrXVI	897361	899667	-1	542.67	317.78	5.55111e-17	1.7
													YOL016C	CMK2	protein_coding	chrXV	294777	296120	-1	161.55	92.9	5.55838e-07	1.7
													YOR035C	SHE4	protein_coding	chrXV	397735	400104	-1	51.69	31.23	0.000520469	1.7
													YAL022C	FUN26	protein_coding	chrI	108877	110430	-1	96.14	56.24	5.2928e-05	1.7
													YKR008W	RSC4	protein_coding	chrXI	452201	454078	1	63.64	37.99	0.000468062	1.7
													YIL048W	NEO1	protein_coding	chrIX	261437	264892	1	56.48	33.55	6.51026e-06	1.7
													YDR074W	TPS2	protein_coding	chrIV	593893	596583	1	158.78	92.8	7.53897e-12	1.7
													YDR519W	FPR2	protein_coding	chrIV	1480425	1480832	1	153.79	89.62	0.00838999	1.7
													YCR081W	SRB8	protein_coding	chrIII	254371	258654	1	33.25	19.36	7.01973e-05	1.7
													YJL092W	SRS2	protein_coding	chrX	257423	260947	1	34.47	19.73	0.000162921	1.7
													YJL042W	MHP1	protein_coding	chrX	361249	365445	1	52.68	31.03	1.13959e-06	1.7
													YLL043W	FPS1	protein_coding	chrXII	49938	51947	1	71.85	43.04	0.000131578	1.7
													YLL028W	TPO1	protein_coding	chrXII	84804	86564	1	82.57	47.61	4.48965e-05	1.7
													YLR206W	ENT2	protein_coding	chrXII	554578	556419	1	81.65	47.93	5.5056e-05	1.7
													YLR350W	ORM2	protein_coding	chrXII	828730	829380	1	388.6	228.79	1.91894e-07	1.7
													YLR403W	SFP1	protein_coding	chrXII	925568	927619	1	78.14	46.51	4.63702e-05	1.7
													YFL047W	RGD2	protein_coding	chrVI	40421	42565	1	37.61	21.62	0.00226512	1.7
													YFL041W	FET5	protein_coding	chrVI	49139	51007	1	93.79	55.83	2.07323e-05	1.7
													YEL065W	SIT1	protein_coding	chrV	27657	29543	1	165.2	99.73	2.94133e-08	1.7
													YER020W	GPA2	protein_coding	chrV	195168	196517	1	68.61	40.3	0.00156211	1.7
													YER032W	FIR1	protein_coding	chrV	215063	217693	1	27.63	16.61	0.00698677	1.7
													YBL085W	BOI1	protein_coding	chrII	63876	66818	1	44.67	25.76	0.000104812	1.7
													YNL278W	CAF120	protein_coding	chrXIV	113271	116453	1	29.73	17.09	0.000948478	1.7
													YNL066W	SUN4	protein_coding	chrXIV	501515	502777	1	693.16	397.56	5.55111e-17	1.7
													YML117W	NAB6	protein_coding	chrXIII	34243	37647	1	79.85	47.15	7.71866e-08	1.7
													YMR058W	FET3	protein_coding	chrXIII	388822	390732	1	859.43	493.77	5.55111e-17	1.7
													YPR124W	CTR1	protein_coding	chrXVI	786208	787428	1	87.28	51.13	0.00065722	1.7
													YPR143W	RRP15	protein_coding	chrXVI	818323	819075	1	88.62	50.93	0.00547045	1.7
													YOR043W	WHI2	protein_coding	chrXV	410870	412330	1	73.62	43.95	0.00090382	1.7
													YOR132W	VPS17	protein_coding	chrXV	573175	574830	1	51.72	31.24	0.00368066	1.7
													YGL125W	MET13	protein_coding	chrVII	272520	274322	1	63.53	36.6	0.000289211	1.7
													YGR157W	CHO2	protein_coding	chrVII	802440	805049	1	212.17	126.09	3.27516e-14	1.7
													YDR146C	SWI5	protein_coding	chrIV	748613	750742	-1	40.21	25.12	0.0062579	1.6
													YCL043C	PDI1	protein_coding	chrIII	48653	50221	-1	1122.3	699.74	5.55111e-17	1.6
													YJL158C	CIS3	protein_coding	chrX	122265	122948	-1	726.6	452.45	3.4584e-11	1.6
													YLL051C	FRE6	protein_coding	chrXII	37333	39471	-1	88	54.2	3.19024e-05	1.6
													YLL019C	KNS1	protein_coding	chrXII	105686	107899	-1	38.69	24.57	0.00805793	1.6
													YLR121C	YPS3	protein_coding	chrXII	388744	390270	-1	76.96	48.48	0.00161147	1.6
													YHR039C	MSC7	protein_coding	chrVIII	184875	186809	-1	90.08	57.61	0.000192715	1.6
													YEL001C	IRC22	protein_coding	chrV	150301	150978	-1	283.52	182.85	0.000117343	1.6
													YNL098C	RAS2	protein_coding	chrXIV	439602	440570	-1	107.92	69.03	0.00387712	1.6
													YNL074C	MLF3	protein_coding	chrXIV	486766	488124	-1	124.59	77.44	0.00010434	1.6
													YMR205C	PFK2	protein_coding	chrXIII	671887	674766	-1	1604.98	1021.93	5.55111e-17	1.6
													YPL094C	SEC62	protein_coding	chrXVI	369839	370663	-1	181.09	110.27	0.000155964	1.6
													YPR133C	SPN1	protein_coding	chrXVI	795978	797210	-1	77.55	47.02	0.00230544	1.6
													YOL002C	IZH2	protein_coding	chrXV	323411	324364	-1	99.18	62.64	0.00486946	1.6
													YOR273C	TPO4	protein_coding	chrXV	834452	836431	-1	72.94	45.94	0.000473137	1.6
													YGR177C	ATF2	protein_coding	chrVII	848829	850436	-1	66.27	41.6	0.00250198	1.6
													YKL185W	ASH1	protein_coding	chrXI	94499	96265	1	116.68	71.67	1.2204e-05	1.6
													YKL096W-A	CWP2	protein_coding	chrXI	259253	259531	1	7321.69	4520.07	5.55111e-17	1.6
													YKR080W	MTD1	protein_coding	chrXI	590395	591357	1	80.67	50.01	0.00826778	1.6
													YKR096W	ESL2	protein_coding	chrXI	626793	630380	1	34.14	21.38	0.00112818	1.6
													YIL076W	SEC28	protein_coding	chrIX	216658	217548	1	223.56	144.14	8.74144e-05	1.6
													YDR351W	SBE2	protein_coding	chrIV	1178666	1181260	1	38.76	24.06	0.00270725	1.6
													YJL095W	BCK1	protein_coding	chrX	247255	251691	1	22	13.67	0.00319848	1.6
													YJL062W	LAS21	protein_coding	chrX	317284	319776	1	57.93	37.21	0.000762236	1.6
													YLR375W	STP3	protein_coding	chrXII	871697	872728	1	138.97	85.56	0.000279287	1.6
													YHR050W	SMF2	protein_coding	chrVIII	207654	209303	1	113.48	72.97	0.000131335	1.6
													YHR206W	SKN7	protein_coding	chrVIII	512732	514600	1	125.76	77.3	3.08926e-06	1.6
													YFL009W	CDC4	protein_coding	chrVI	116145	118484	1	47.25	28.97	0.00130995	1.6
													YER169W	RPH1	protein_coding	chrV	523369	525759	1	36.24	23.13	0.00827283	1.6
													YNR006W	VPS27	protein_coding	chrXIV	636986	638854	1	46.36	28.15	0.00381078	1.6
													YNR017W	TIM23	protein_coding	chrXIV	662913	663581	1	166.74	106.65	0.00285715	1.6
													YML057W	CMP2	protein_coding	chrXIII	160180	161994	1	45.55	28.01	0.00570626	1.6
													YML001W	YPT7	protein_coding	chrXIII	267174	267800	1	150.91	96.73	0.00622588	1.6
													YMR004W	MVP1	protein_coding	chrXIII	274017	275552	1	48.63	29.61	0.0074989	1.6
													YMR191W	SPG5	protein_coding	chrXIII	645656	646777	1	86.11	53.26	0.00310273	1.6
													YMR266W	RSN1	protein_coding	chrXIII	798518	801379	1	197.66	124.03	3.18012e-12	1.6
													YPL254W	HFI1	protein_coding	chrXVI	69485	70951	1	54.99	34.05	0.00697636	1.6
													YOL059W	GPD2	protein_coding	chrXV	217126	218448	1	370.39	227.18	1.36767e-11	1.6
													YOR301W	RAX1	protein_coding	chrXV	880965	882272	1	64.72	39.55	0.00466452	1.6
													YAL051W	OAF1	protein_coding	chrI	48564	51707	1	40.23	25.25	0.000984786	1.6
													YGL100W	SEH1	protein_coding	chrVII	313234	314283	1	112.88	68.8	0.000773153	1.6
													YGR281W	YOR1	protein_coding	chrVII	1052824	1057257	1	97.26	59.74	2.49523e-10	1.6
													YKL192C	ACP1	protein_coding	chrXI	80160	80537	-1	389.96	254.82	0.00102581	1.5
													YIL047C	SYG1	protein_coding	chrIX	265115	267823	-1	145.96	98.77	6.28347e-07	1.5
													YDR166C	SEC5	protein_coding	chrIV	786306	789221	-1	35.52	22.94	0.00480415	1.5
													YCR017C	CWH43	protein_coding	chrIII	144773	147634	-1	124.58	80.4	1.61505e-07	1.5
													YJL020C	BBC1	protein_coding	chrX	398937	402410	-1	71.96	48.78	7.9495e-05	1.5
													YJR091C	JSN1	protein_coding	chrX	595061	598336	-1	107.32	70.78	6.61514e-07	1.5
													YLR028C	ADE16	protein_coding	chrXII	199540	201315	-1	113.28	76.83	0.000407813	1.5
													YLR305C	STT4	protein_coding	chrXII	738161	743863	-1	100.42	68.03	2.22397e-09	1.5
													YHR009C	TDA3	protein_coding	chrVIII	124109	125680	-1	148.89	98.15	4.87763e-05	1.5
													YHR030C	SLT2	protein_coding	chrVIII	168890	170344	-1	119.11	80.91	0.0010797	1.5
													YER155C	BEM2	protein_coding	chrV	476345	482848	-1	114.54	74.32	6.90559e-14	1.5
													YBL105C	PKC1	protein_coding	chrII	14241	17696	-1	55.33	36.65	0.000278178	1.5
													YBL101C	ECM21	protein_coding	chrII	24946	28299	-1	35.63	23.93	0.00532945	1.5
													YBR036C	CSG2	protein_coding	chrII	309081	310313	-1	247.18	161.3	2.1988e-06	1.5
													YBR222C	PCS60	protein_coding	chrII	666720	668351	-1	139.75	95.64	0.000227538	1.5
													YBR276C	PPS1	protein_coding	chrII	757620	760043	-1	48.89	33.11	0.00647879	1.5
													YMR016C	SOK2	protein_coding	chrXIII	303236	305593	-1	58.71	38.96	0.00207101	1.5
													YMR047C	NUP116	protein_coding	chrXIII	363364	366705	-1	56.92	38.96	0.000767001	1.5
													YPL089C	RLM1	protein_coding	chrXVI	379120	381150	-1	64.24	43.03	0.00341182	1.5
													YOR098C	NUP1	protein_coding	chrXV	507948	511178	-1	86.93	59.07	3.20496e-05	1.5
													YGL077C	HNM1	protein_coding	chrVII	362225	363916	-1	169.53	116.49	4.25118e-05	1.5
													YGL035C	MIG1	protein_coding	chrVII	431548	433062	-1	81.52	55.93	0.00701147	1.5
													YGR119C	NUP57	protein_coding	chrVII	728046	729671	-1	64.93	42.23	0.00503169	1.5
													YKL207W	EMC3	protein_coding	chrXI	48194	48955	1	158.15	103	0.00279323	1.5
													YKR093W	PTR2	protein_coding	chrXI	615730	617535	1	433.47	290.87	9.00946e-13	1.5
													YIL123W	SIM1	protein_coding	chrIX	128151	129581	1	327.12	213.15	3.96462e-09	1.5
													YDL128W	VCX1	protein_coding	chrIV	232652	233887	1	257.86	170.29	2.34579e-06	1.5
													YDR420W	HKR1	protein_coding	chrIV	1306267	1311675	1	33.33	22.92	0.00119929	1.5
													YJL198W	PHO90	protein_coding	chrX	60844	63489	1	95.98	65.73	0.000102861	1.5
													YJR001W	AVT1	protein_coding	chrX	436802	438610	1	83.14	55.22	0.0013585	1.5
													YLR449W	FPR4	protein_coding	chrXII	1030834	1032012	1	197.68	132.38	9.00578e-05	1.5
													YHR023W	MYO1	protein_coding	chrVIII	151666	157452	1	42.34	28.97	0.000133312	1.5
													YHR103W	SBE22	protein_coding	chrVIII	320414	322972	1	74.73	50.19	0.000424174	1.5
													YPL006W	NCR1	protein_coding	chrXVI	544631	548143	1	40.54	27.16	0.00223059	1.5
													YPR115W	RGC1	protein_coding	chrXVI	754877	758128	1	45.94	30.72	0.00165278	1.5
													YPR183W	DPM1	protein_coding	chrXVI	900755	901558	1	386.5	257.35	4.66425e-06	1.5
													YOL109W	ZEO1	protein_coding	chrXV	110297	110638	1	2344.33	1543.82	4.92939e-14	1.5
													YOR153W	PDR5	protein_coding	chrXV	619840	624375	1	1148.36	778.61	5.55111e-17	1.5
													YOR191W	ULS1	protein_coding	chrXV	692475	697334	1	28.9	18.72	0.00110346	1.5
													YOR285W	RDL1	protein_coding	chrXV	849635	850054	1	291.68	188.99	0.00232003	1.5
													YGR097W	ASK10	protein_coding	chrVII	678695	682135	1	50.65	34.73	0.00133995	1.5
													YGR204W	ADE3	protein_coding	chrVII	905934	908774	1	358.99	239.84	2.22045e-16	1.5
													YKL164C	PIR1	protein_coding	chrXI	141794	142819	-1	1101.79	764.09	1.88738e-15	1.4
													YKR031C	SPO14	protein_coding	chrXI	501344	506395	-1	30.75	21.36	0.00333739	1.4
													YKR054C	DYN1	protein_coding	chrXI	535647	547925	-1	20.03	13.95	0.000239714	1.4
													YDL215C	GDH2	protein_coding	chrIV	70640	73918	-1	48.9	35.09	0.00615765	1.4
													YDR497C	ITR1	protein_coding	chrIV	1443713	1445467	-1	279.78	205.82	8.11448e-06	1.4
													YJL212C	OPT1	protein_coding	chrX	33850	36249	-1	105.41	75.07	0.000446158	1.4
													YJL141C	YAK1	protein_coding	chrX	147967	150390	-1	57.11	40.1	0.00703993	1.4
													YLR034C	SMF3	protein_coding	chrXII	210512	211933	-1	133.78	97.21	0.00399303	1.4
													YLR058C	SHM2	protein_coding	chrXII	257992	259401	-1	894.26	657.83	8.61977e-13	1.4
													YLR089C	ALT1	protein_coding	chrXII	318237	320015	-1	96.29	71.19	0.00941863	1.4
													YLR110C	CCW12	protein_coding	chrXII	369697	370098	-1	15754.8	10977.5	5.55111e-17	1.4
													YLR229C	CDC42	protein_coding	chrXII	604212	604787	-1	273.2	198.19	0.00851013	1.4
													YLR378C	SEC61	protein_coding	chrXII	875736	877178	-1	401.01	292.96	7.64442e-07	1.4
													YLR436C	ECM30	protein_coding	chrXII	1007421	1011245	-1	54.16	38.71	0.00164751	1.4
													YFR051C	RET2	protein_coding	chrVI	250163	251803	-1	169.33	118.48	0.000116586	1.4
													YEL060C	PRB1	protein_coding	chrV	40046	41953	-1	123.71	88.81	0.000905282	1.4
													YEL047C	FRD1	protein_coding	chrV	65385	66797	-1	164.94	116.77	0.000618637	1.4
													YER145C	FTR1	protein_coding	chrV	460526	461740	-1	168.05	122.59	0.00318264	1.4
													YBR023C	CHS3	protein_coding	chrII	284428	287925	-1	98.23	68.33	1.37307e-05	1.4
													YBR029C	CDS1	protein_coding	chrII	296369	297742	-1	123.23	88.93	0.00560484	1.4
													YBR126C	TPS1	protein_coding	chrII	488905	490392	-1	182.73	133.06	0.000623163	1.4
													YBR133C	HSL7	protein_coding	chrII	501804	504287	-1	54.13	37.7	0.00669758	1.4
													YML016C	PPZ1	protein_coding	chrXIII	239458	241536	-1	65.63	45.9	0.00687008	1.4
													YMR006C	PLB2	protein_coding	chrXIII	277561	279681	-1	124.91	92.09	0.00112972	1.4
													YMR120C	ADE17	protein_coding	chrXIII	507502	509280	-1	495.47	355.44	1.32036e-10	1.4
													YMR272C	SCS7	protein_coding	chrXIII	809623	810777	-1	146.59	105.02	0.00470178	1.4
													YPL128C	TBF1	protein_coding	chrXVI	306533	308221	-1	77.84	53.86	0.00643404	1.4
													YPL057C	SUR1	protein_coding	chrXVI	451909	453057	-1	314.66	225.1	3.37976e-05	1.4
													YOL136C	PFK27	protein_coding	chrXV	67561	68754	-1	206.04	152.38	0.00188548	1.4
													YOR128C	ADE2	protein_coding	chrXV	564476	566191	-1	111.44	81.6	0.00475497	1.4
													YAL040C	CLN3	protein_coding	chrI	65778	67520	-1	135.43	97.73	0.001074	1.4
													YGL038C	OCH1	protein_coding	chrVII	425362	426804	-1	124.93	86.53	0.00145714	1.4
													YGR189C	CRH1	protein_coding	chrVII	876669	878192	-1	433.94	321.28	3.8045e-07	1.4
													YKL184W	SPE1	protein_coding	chrXI	96757	98157	1	128.67	92.31	0.00366321	1.4
													YKL117W	SBA1	protein_coding	chrXI	220324	220974	1	226.43	158.92	0.00536328	1.4
													YIL162W	SUC2	protein_coding	chrIX	37385	38983	1	128.94	89.24	0.000650078	1.4
													YIL056W	VHR1	protein_coding	chrIX	249991	251913	1	82.35	58.44	0.00504008	1.4
													YDR077W	SED1	protein_coding	chrIV	600793	601809	1	2179.99	1556.6	5.55111e-17	1.4
													YJL159W	HSP150	protein_coding	chrX	120449	121690	1	1889.31	1341.39	5.55111e-17	1.4
													YJL005W	CYR1	protein_coding	chrX	425157	431237	1	41.27	29.19	0.000366131	1.4
													YJR066W	TOR1	protein_coding	chrX	559416	566828	1	45.28	32.48	7.37467e-05	1.4
													YLL015W	BPT1	protein_coding	chrXII	116432	121111	1	37.46	27.25	0.00589124	1.4
													YLR113W	HOG1	protein_coding	chrXII	371620	372927	1	165.23	118.64	0.0015055	1.4
													YLR138W	NHA1	protein_coding	chrXII	418437	421394	1	66.33	48.84	0.00492189	1.4
													YLR357W	RSC2	protein_coding	chrXII	841331	844000	1	57.82	41.75	0.00829593	1.4
													YFR019W	FAB1	protein_coding	chrVI	184502	191338	1	25.49	17.87	0.00239045	1.4
													YEL007W	MIT1	protein_coding	chrV	141892	143892	1	80.63	57.05	0.00433268	1.4
													YBR041W	FAT1	protein_coding	chrII	318266	320275	1	74.82	53.69	0.00799968	1.4
													YBR078W	ECM33	protein_coding	chrII	393123	394742	1	1262.19	932.61	5.55111e-17	1.4
													YNL091W	NST1	protein_coding	chrXIV	452408	456130	1	54.57	40.25	0.00438374	1.4
													YML100W	TSL1	protein_coding	chrXIII	70624	73920	1	56.79	39.22	0.00108776	1.4
													YML081W	TDA9	protein_coding	chrXIII	104777	108532	1	62.05	45.83	0.00238636	1.4
													YMR215W	GAS3	protein_coding	chrXIII	696796	698370	1	325.04	236.7	2.68115e-06	1.4
													YPL265W	DIP5	protein_coding	chrXVI	41043	42869	1	110.12	80.55	0.00367353	1.4
													YPL179W	PPQ1	protein_coding	chrXVI	208157	209806	1	144.87	104.32	0.000929811	1.4
													YPR113W	PIS1	protein_coding	chrXVI	752257	752919	1	310.96	216.58	0.000786182	1.4
													YPR159W	KRE6	protein_coding	chrXVI	857583	859745	1	290.55	206.99	3.22501e-08	1.4
													YOL081W	IRA2	protein_coding	chrXV	171070	180309	1	87.09	63.9	8.50158e-09	1.4
													YOR303W	CPA1	protein_coding	chrXV	882899	884134	1	135.38	96.69	0.00461149	1.4
													YAR015W	ADE1	protein_coding	chrI	169375	170295	1	192.49	135.57	0.00247556	1.4
													YGL234W	ADE5,7	protein_coding	chrVII	56482	58890	1	554.84	399.47	4.77396e-15	1.4
													YGL215W	CLG1	protein_coding	chrVII	87981	89339	1	185.42	133.22	0.000624935	1.4
													YGR260W	TNA1	protein_coding	chrVII	1012485	1014089	1	222.16	160.04	5.35534e-05	1.4
													YIL147C	SLN1	protein_coding	chrIX	69791	73453	-1	57.92	43.1	0.00462803	1.3
													YIL051C	MMF1	protein_coding	chrIX	257843	258280	-1	1255.21	961.1	3.33974e-05	1.3
													YDR072C	IPT1	protein_coding	chrIV	589761	591344	-1	184.23	144.7	0.00591275	1.3
													YDR264C	AKR1	protein_coding	chrIV	996029	998323	-1	129.76	97.54	0.00115989	1.3
													YDR293C	SSD1	protein_coding	chrIV	1045640	1049392	-1	137.2	109.55	0.00062185	1.3
													YJL207C	LAA1	protein_coding	chrX	41389	47433	-1	63.27	49.57	0.00146806	1.3
													YJL130C	URA2	protein_coding	chrX	165723	172367	-1	486.52	368.29	5.55111e-17	1.3
													YJR009C	TDH2	protein_coding	chrX	453683	454681	-1	4648.9	3596.04	5.55111e-17	1.3
													YJR045C	SSC1	protein_coding	chrX	519638	521602	-1	704.03	553.28	2.22394e-09	1.3
													YLR286C	CTS1	protein_coding	chrXII	708448	710136	-1	1654.07	1269.42	5.55111e-17	1.3
													YHR082C	KSP1	protein_coding	chrVIII	268459	271548	-1	116.04	89.76	0.00123576	1.3
													YER088C	DOT6	protein_coding	chrV	333176	335188	-1	159.32	126.71	0.0060562	1.3
													YBL017C	PEP1	protein_coding	chrII	186844	191583	-1	80.48	63.97	0.00270026	1.3
													YBL007C	SLA1	protein_coding	chrII	212632	216366	-1	177.86	132.05	4.48805e-07	1.3
													YBR068C	BAP2	protein_coding	chrII	373861	375690	-1	421.25	319.22	3.58236e-07	1.3
													YBR115C	LYS2	protein_coding	chrII	469748	473926	-1	99.38	78.75	0.00151766	1.3
													YBR140C	IRA1	protein_coding	chrII	517350	526628	-1	63.11	48.25	1.66715e-05	1.3
													YNL307C	MCK1	protein_coding	chrXIV	56446	57573	-1	268.42	200.04	0.000759293	1.3
													YNL283C	WSC2	protein_coding	chrXIV	105184	106695	-1	170.61	128.59	0.00272292	1.3
													YNL219C	ALG9	protein_coding	chrXIV	235996	237663	-1	140.32	106.4	0.00513464	1.3
													YNL055C	POR1	protein_coding	chrXIV	517994	518845	-1	848.69	677.27	4.81404e-05	1.3
													YML075C	HMG1	protein_coding	chrXIII	115734	118898	-1	109.51	85.1	0.00178548	1.3
													YML059C	NTE1	protein_coding	chrXIII	153219	158258	-1	59.09	45.12	0.00206085	1.3
													YMR080C	NAM7	protein_coding	chrXIII	426712	429627	-1	104.17	82.58	0.0067732	1.3
													YPL137C	GIP3	protein_coding	chrXVI	292817	296647	-1	82.93	63.56	0.00166262	1.3
													YPL032C	SVL3	protein_coding	chrXVI	488887	491364	-1	169.21	129.93	0.000333473	1.3
													YAL021C	CCR4	protein_coding	chrI	110846	113359	-1	135.89	103.94	0.00103149	1.3
													YGL037C	PNC1	protein_coding	chrVII	427297	427947	-1	333.52	253.45	0.00745111	1.3
													YGR240C	PFK1	protein_coding	chrVII	970771	973734	-1	1104.51	856.96	5.55111e-17	1.3
													YDL112W	TRM3	protein_coding	chrIV	258915	263225	1	82.02	61.86	0.00046241	1.3
													YDR033W	MRH1	protein_coding	chrIV	508147	509109	1	1226.61	923.36	1.19051e-10	1.3
													YDR062W	LCB2	protein_coding	chrIV	576474	578159	1	226.25	171.92	0.000388481	1.3
													YDR093W	DNF2	protein_coding	chrIV	631282	636120	1	69.16	52.34	0.000759798	1.3
													YDR119W	VBA4	protein_coding	chrIV	688227	690533	1	148.51	117.91	0.00426917	1.3
													YDR208W	MSS4	protein_coding	chrIV	868224	870563	1	83	62.51	0.00911671	1.3
													YJL172W	CPS1	protein_coding	chrX	97737	99467	1	253.74	193.73	0.000179891	1.3
													YLR371W	ROM2	protein_coding	chrXII	862714	866784	1	49.42	37.02	0.00694769	1.3
													YLR450W	HMG2	protein_coding	chrXII	1032627	1035764	1	90.14	70.2	0.00512542	1.3
													YHR025W	THR1	protein_coding	chrVIII	159438	160511	1	411.75	323.03	0.000665227	1.3
													YHR042W	NCP1	protein_coding	chrVIII	190543	192618	1	245.16	194.18	0.000437755	1.3
													YEL032W	MCM3	protein_coding	chrV	86937	89852	1	78.9	59.95	0.00584882	1.3
													YEL031W	SPF1	protein_coding	chrV	90258	93905	1	409.26	318.31	1.03255e-10	1.3
													YEL013W	VAC8	protein_coding	chrV	128825	130561	1	161.7	124.77	0.00390785	1.3
													YPL221W	FLC1	protein_coding	chrXVI	133043	135424	1	108.29	82.37	0.003643	1.3
													YPL075W	GCR1	protein_coding	chrXVI	412254	415362	1	62.79	47.05	0.00786241	1.3
													YOL030W	GAS5	protein_coding	chrXV	268187	269641	1	372.38	286.87	5.54752e-05	1.3
													YOR204W	DED1	protein_coding	chrXV	722911	724725	1	1391.63	1106.11	1.13243e-14	1.3
													YOR355W	GDS1	protein_coding	chrXV	1005137	1006705	1	154.25	117.67	0.00528787	1.3

## Sheet: DE trf5fpr3fpr4 vs trf5fpr3
List of DE genes in ∆trf5∆fpr3 vs ∆trf5∆fpr3∆fpr4
UP - regulated genes													DN - regulated genes
systematic name	standard name	orf type	chr	start	end	strand	trf5-KAN-THMPP-SGA_S14	trf5-KAN-fpr4-NAT-MPP-SGA_S15	pv	FC			systematic name	standard name	orf type	chr	start	end	strand	trf5-KAN-THMPP-SGA_S14	trf5-KAN-fpr4-NAT-MPP-SGA_S15	pv	FC
YFL014W	HSP12	protein_coding	chrVI	107256	107585	1	4.06	366.84	5.55111e-17	90.4			YLR449W	FPR4	protein_coding	chrXII	1030834	1032012	1	207.78	1.51	5.55111e-17	137.6
YOL052C-A	DDR2	protein_coding	chrXV	231570	231755	-1	7.2	497.71	4.44089e-16	69.2			YAR071W	PHO11	protein_coding	chrI	225460	226863	1	31.46	1.27	6.09871e-08	24.8
YMR095C	SNO1	protein_coding	chrXIII	457285	457959	-1	1.98	60.66	1.36784e-07	30.6			YDR281C	PHM6	protein_coding	chrIV	1022007	1022321	-1	76.49	5.65	0.000142251	13.5
YJL116C	NCA3	protein_coding	chrX	193860	194873	-1	9.24	219.46	5.55111e-17	23.7			YML123C	PHO84	protein_coding	chrXIII	24037	25800	-1	1007.77	74.68	5.55111e-17	13.5
YLR438W	CAR2	protein_coding	chrXII	1012501	1013775	1	2.1	41.89	4.5393e-09	19.9			YPL019C	VTC3	protein_coding	chrXVI	514511	517018	-1	277.55	28.39	5.55111e-17	9.8
YLR327C	TMA10	protein_coding	chrXII	783127	783387	-1	5.13	88.67	0.000136124	17.3			tQ(CUG)M	CDC65	tRNA	chrXIII	808246	808317	-1	185.92	24.73	0.00961957	7.5
YOR010C	TIR2	protein_coding	chrXV	346195	346950	-1	1.77	30.61	0.000136124	17.3			YBR296C	PHO89	protein_coding	chrII	796798	798522	-1	76.05	10.32	6.66134e-16	7.4
YMR096W	SNZ1	protein_coding	chrXIII	458408	459301	1	14.97	209.09	5.55111e-17	14			YHR136C	SPL2	protein_coding	chrVIII	374654	375100	-1	113.8	15.93	5.97274e-07	7.1
YKL163W	PIR3	protein_coding	chrXI	144401	145378	1	9.58	127.42	5.55111e-17	13.3			YNL246W	VPS75	protein_coding	chrXIV	185460	186349	1	25.57	4	0.00114195	6.4
YIL098C	FMC1	protein_coding	chrIX	179772	180239	-1	5.72	72.28	7.98564e-06	12.6			YBR093C	PHO5	protein_coding	chrII	429548	430951	-1	72.46	11.41	6.56675e-12	6.3
YOL108C	INO4	protein_coding	chrXV	111431	111886	-1	2.94	35.14	0.0022668	12			YHR215W	PHO12	protein_coding	chrVIII	552099	553502	1	102.02	16.48	5.55111e-16	6.2
YLR315W	NKP2	protein_coding	chrXII	764808	765269	1	2.9	34.68	0.0022668	12			YJR047C	ANB1	protein_coding	chrX	524908	525381	-1	39.54	7.51	0.00516467	5.3
YGR131W	FHN1	protein_coding	chrVII	754726	755250	1	2.55	30.52	0.0022668	12			YJL012C	VTC4	protein_coding	chrX	411234	413399	-1	319.52	68.22	5.55111e-17	4.7
YHR087W	RTC3	protein_coding	chrVIII	280820	281155	1	11.95	137.76	2.42508e-07	11.5			YDR123C	INO2	protein_coding	chrIV	698554	699468	-1	35.11	7.78	0.000511568	4.5
YDR277C	MTH1	protein_coding	chrIV	1014401	1015702	-1	4.11	45.12	7.55315e-09	11			YDR516C	EMI2	protein_coding	chrIV	1474974	1476476	-1	34.74	8.29	1.68064e-05	4.2
YDR043C	NRG1	protein_coding	chrIV	542674	543369	-1	13.46	145.8	3.45279e-14	10.8			YHR106W	TRR2	protein_coding	chrVIII	325598	326626	1	28.62	6.92	0.0013033	4.1
YBR297W	MAL33	protein_coding	chrII	800523	801929	1	5.71	56.94	2.86357e-11	10			YER072W	VTC1	protein_coding	chrV	302806	303195	1	1177.31	292.15	5.55111e-17	4
YDR059C	UBC5	protein_coding	chrIV	569234	569770	-1	7.48	72.93	3.55607e-06	9.8			YIL119C	RPI1	protein_coding	chrIX	136654	137877	-1	24.06	7.27	0.00383062	3.3
YOR226C	ISU2	protein_coding	chrXV	761614	762084	-1	48.32	472.47	5.55111e-17	9.8			YGR286C	BIO2	protein_coding	chrVII	1063813	1064940	-1	71.2	22.1	2.52194e-06	3.2
YKL161C	KDX1	protein_coding	chrXI	149386	150687	-1	5.14	47.86	6.50814e-09	9.3			YOR026W	BUB3	protein_coding	chrXV	379781	380806	1	39.14	12.15	0.000875063	3.2
tP(UGG)H	SUF8	tRNA	chrVIII	388893	388995	-1	13	120.99	0.00945231	9.3			YJL095W	BCK1	protein_coding	chrX	247255	251691	1	37.11	12.04	5.13384e-11	3.1
YEL059C-A	SOM1	protein_coding	chrV	42400	42624	-1	5.95	55.39	0.00945231	9.3			YER011W	TIR1	protein_coding	chrV	175248	176012	1	69.99	23.27	0.000225122	3
YGL121C	GPG1	protein_coding	chrVII	280777	281157	-1	3.51	32.71	0.00945231	9.3			YLR183C	TOS4	protein_coding	chrXII	520543	522012	-1	24.59	8.48	0.0030602	2.9
YGR236C	SPG1	protein_coding	chrVII	962530	962817	-1	4.65	43.27	0.00945231	9.3			YER174C	GRX4	protein_coding	chrV	538434	539168	-1	78.31	26.64	0.000163305	2.9
YDR079W	PET100	protein_coding	chrIV	603064	603399	1	11.95	105.97	1.35919e-05	8.9			YBR052C	RFS1	protein_coding	chrII	338720	339352	-1	82.48	28.12	0.000337155	2.9
YKL218C	SRY1	protein_coding	chrXI	17359	18339	-1	4.09	34.48	2.65527e-05	8.4			YOL087C	DUF1	protein_coding	chrXV	155287	158637	-1	36.35	12.75	7.61088e-08	2.9
YGR043C	NQM1	protein_coding	chrVII	580435	581436	-1	5.34	44.42	1.53065e-06	8.3			YMR036C	MIH1	protein_coding	chrXIII	341856	343520	-1	39.4	13.9	8.51776e-05	2.8
YIR024C	INA22	protein_coding	chrIX	402841	403491	-1	6.17	49.22	5.1838e-05	8			YNL233W	BNI4	protein_coding	chrXIV	211922	214600	1	37.48	13.29	1.26898e-06	2.8
YBL043W	ECM13	protein_coding	chrII	136688	137461	1	5.19	41.4	5.1838e-05	8			YGR233C	PHO81	protein_coding	chrVII	954674	958210	-1	54.12	20.13	9.85572e-11	2.7
YOL155C	HPF1	protein_coding	chrXV	28703	31606	-1	24.89	194.95	5.55111e-17	7.8			YJR060W	CBF1	protein_coding	chrX	548759	549814	1	31.69	11.8	0.00687321	2.7
YER150W	SPI1	protein_coding	chrV	468370	468816	1	44.92	346.5	5.55111e-17	7.7			YGL255W	ZRT1	protein_coding	chrVII	20978	22108	1	89.95	33.06	1.95701e-06	2.7
YFL017W-A	SMX2	protein_coding	chrVI	103699	103932	1	51.49	372.79	5.96751e-11	7.2			YDL227C	HO	protein_coding	chrIV	46271	48031	-1	28.89	11.12	0.00115029	2.6
YMR255W	GFD1	protein_coding	chrXIII	778001	778567	1	16.53	119.31	8.42859e-09	7.2			YNL102W	POL1	protein_coding	chrXIV	430087	434493	1	27.03	10.5	7.79653e-07	2.6
YPR036W-A	SPO24	protein_coding	chrXVI	645950	646153	1	577.45	3953.26	5.55111e-17	6.8			YPL061W	ALD6	protein_coding	chrXVI	432588	434090	1	1181.88	456.03	5.55111e-17	2.6
YLR022C	SDO1	protein_coding	chrXII	184174	184926	-1	60.44	397.19	5.55111e-17	6.6			YPR158W	CUR1	protein_coding	chrXVI	843262	844020	1	54.67	21.11	0.00339275	2.6
YJR022W	LSM8	protein_coding	chrX	469784	470113	1	8.11	53.95	0.00373718	6.6			YJR009C	TDH2	protein_coding	chrX	453683	454681	-1	3502.7	1375.75	5.55111e-17	2.5
YNL036W	NCE103	protein_coding	chrXIV	559814	560479	1	60.3	400.96	5.55111e-17	6.6			YBR059C	AKL1	protein_coding	chrII	356861	360187	-1	38.22	15.52	8.29939e-07	2.5
YER037W	PHM8	protein_coding	chrV	225889	226854	1	19.4	119.79	3.95906e-13	6.2			YMR088C	VBA1	protein_coding	chrXIII	443414	445102	-1	36.46	14.76	0.000586499	2.5
YKL006C-A	SFT1	protein_coding	chrXI	430198	430632	-1	15.39	94.13	1.65961e-05	6.1			YGL150C	INO80	protein_coding	chrVII	221104	225573	-1	40.13	16.33	5.16349e-09	2.5
YLR295C	ATP14	protein_coding	chrXII	721999	722373	-1	89.24	541.2	5.55111e-17	6.1			YDR481C	PHO8	protein_coding	chrIV	1418550	1420250	-1	165.26	70.12	1.71341e-12	2.4
YMR244C-A	COA6	protein_coding	chrXIII	758517	758831	-1	25.5	152.59	3.50697e-06	6			YJL168C	SET2	protein_coding	chrX	102227	104428	-1	31.61	12.94	0.000292129	2.4
YDL123W	SNA4	protein_coding	chrIV	241418	241840	1	25.32	151.51	8.49676e-08	6			YHL033C	RPL8A	protein_coding	chrVIII	35255	36025	-1	1430.66	586.5	5.55111e-17	2.4
tL(CAA)C	SUP53	tRNA	chrIII	90859	90972	1	23.48	140.55	0.00740357	6			YDR301W	CFT1	protein_coding	chrIV	1063352	1067425	1	34.17	13.98	3.01451e-07	2.4
YJL108C	PRM10	protein_coding	chrX	217705	218856	-1	5.81	34	3.16012e-05	5.9			YHR183W	GND1	protein_coding	chrVIII	470960	472429	1	863.28	354.84	5.55111e-17	2.4
YPL156C	PRM4	protein_coding	chrXVI	255913	256767	-1	7.83	45.81	3.16012e-05	5.9			YOR346W	REV1	protein_coding	chrXV	981828	984785	1	40.73	16.85	2.34513e-06	2.4
YER062C	GPP2	protein_coding	chrV	279930	280682	-1	39.11	224.6	5.55111e-17	5.7			YLR085C	ARP6	protein_coding	chrXII	300673	301989	-1	30.49	13.52	0.0104023	2.3
YMR055C	BUB2	protein_coding	chrXIII	386101	387021	-1	11.63	65.72	3.00212e-07	5.7			YNL291C	MID1	protein_coding	chrXIV	84169	85815	-1	78.84	34.59	3.28381e-06	2.3
YBR183W	YPC1	protein_coding	chrII	596115	597065	1	9.85	56.16	1.40687e-06	5.7			YAL049C	AIM2	protein_coding	chrI	51855	52595	-1	70.45	31.23	0.00348559	2.3
YPR133W-A	TOM5	protein_coding	chrXVI	797557	797709	1	244.98	1361.39	5.55111e-17	5.6			YDL095W	PMT1	protein_coding	chrIV	287059	289512	1	242.74	103.74	5.55111e-17	2.3
YMR182C	RGM1	protein_coding	chrXIII	624532	625167	-1	12.63	69.98	1.25368e-05	5.5			YJL088W	ARG3	protein_coding	chrX	268799	269815	1	130.31	57.77	3.2493e-06	2.3
YCR097W	HMRA1	protein_coding	chrIII	293835	294321	1	38.48	212.02	3.0949e-11	5.5			YDR502C	SAM2	protein_coding	chrIV	1453310	1454464	-1	141.4	64.74	5.52324e-07	2.2
YLR137W	RKM5	protein_coding	chrXII	417006	418109	1	7.28	40.31	1.25368e-05	5.5			YLR231C	BNA5	protein_coding	chrXII	605758	607119	-1	51.11	23.53	0.00114971	2.2
YDR308C	SRB7	protein_coding	chrIV	1078027	1078449	-1	25.32	134.68	1.05196e-06	5.3			YFR037C	RSC8	protein_coding	chrVI	227513	229186	-1	49.58	22.33	0.000286515	2.2
YDR533C	HSP31	protein_coding	chrIV	1501447	1502160	-1	7.5	39.89	0.000556746	5.3			YFR039C	OSW7	protein_coding	chrVI	232012	233544	-1	42.79	19.74	0.00164008	2.2
YJR136C	TTI2	protein_coding	chrX	677441	678706	-1	6.34	33.75	2.36153e-05	5.3			YER017C	AFG3	protein_coding	chrV	189503	191788	-1	59.73	27.26	4.36171e-06	2.2
YBR105C	VID24	protein_coding	chrII	450881	451969	-1	55.32	294.26	5.55111e-17	5.3			YOR375C	GDH1	protein_coding	chrXV	1041678	1043042	-1	347.16	160.42	5.55111e-17	2.2
YMR148W	OSW5	protein_coding	chrXIII	560366	560812	1	32.94	175.24	1.03889e-08	5.3			YDL093W	PMT5	protein_coding	chrIV	289909	292140	1	49.18	22.33	3.49642e-05	2.2
YOL008W	COQ10	protein_coding	chrXV	310312	310935	1	15.02	79.88	4.96229e-06	5.3			YLR188W	MDL1	protein_coding	chrXII	528300	530387	1	60.91	28.14	1.19373e-05	2.2
YGR206W	MVB12	protein_coding	chrVII	910432	910737	1	17.5	93.09	0.000556746	5.3			YNL067W	RPL9B	protein_coding	chrXIV	499681	500256	1	734.39	333.8	4.44089e-16	2.2
YKL062W	MSN4	protein_coding	chrXI	323228	325120	1	25.46	133.54	5.55111e-17	5.2			YKL059C	MPE1	protein_coding	chrXI	328118	329443	-1	31.3	14.77	0.0144076	2.1
YIL040W	APQ12	protein_coding	chrIX	277723	278139	1	170.14	892.27	5.55111e-17	5.2			YER043C	SAH1	protein_coding	chrV	235770	237119	-1	1453.66	697.6	5.55111e-17	2.1
YJR050W	ISY1	protein_coding	chrX	528697	529404	1	15.13	77.95	1.96221e-06	5.2			YML086C	ALO1	protein_coding	chrXIII	95791	97371	-1	100.76	47.29	1.42712e-06	2.1
YCR071C	IMG2	protein_coding	chrIII	240103	240543	-1	21.25	109	9.2839e-06	5.1			YMR006C	PLB2	protein_coding	chrXIII	277561	279681	-1	159.05	77.22	1.32545e-11	2.1
YER050C	RSM18	protein_coding	chrV	253971	254387	-1	32.1	162.23	1.65877e-07	5.1			YOL086C	ADH1	protein_coding	chrXV	159548	160594	-1	5956.75	2877.01	5.55111e-17	2.1
YGL179C	TOS3	protein_coding	chrVII	163409	165091	-1	15.11	75.1	1.11899e-12	5			YOR335C	ALA1	protein_coding	chrXV	946233	949109	-1	411.32	194.92	5.55111e-17	2.1
YNL222W	SSU72	protein_coding	chrXIV	229094	229714	1	10.78	51.6	0.000404113	4.8			YIR023W	DAL81	protein_coding	chrIX	399777	402689	1	23.9	11.61	0.00213639	2.1
YDR162C	NBP2	protein_coding	chrIV	780390	781100	-1	7.53	35.05	0.00200943	4.7			YDR539W	FDC1	protein_coding	chrIV	1512094	1513605	1	37.18	17.66	0.00467311	2.1
YOR215C	AIM41	protein_coding	chrXV	746725	747282	-1	35.98	169.09	1.6369e-09	4.7			YLR207W	HRD3	protein_coding	chrXII	556788	559289	1	41.2	19.21	9.4449e-05	2.1
YLR021W	IRC25	protein_coding	chrXII	183623	184162	1	17.35	82.42	3.22054e-05	4.7			YIL147C	SLN1	protein_coding	chrIX	69791	73453	-1	63.59	31.1	2.46752e-08	2
YHR116W	COX23	protein_coding	chrVIII	341665	342120	1	11.74	54.66	0.00200943	4.7			YDR097C	MSH6	protein_coding	chrIV	640109	643837	-1	28.72	14.32	0.000217162	2
YMR059W	SEN15	protein_coding	chrXIII	391099	391485	1	13.84	64.4	0.00200943	4.7			YDR348C	PAL1	protein_coding	chrIV	1170326	1171825	-1	66.04	33.23	0.000432046	2
YJR082C	EAF6	protein_coding	chrX	581914	582255	-1	27.4	124.93	5.96769e-05	4.6			YLR153C	ACS2	protein_coding	chrXII	445524	447575	-1	321.61	158.77	5.55111e-17	2
YKR020W	VPS51	protein_coding	chrXI	478338	478832	1	18.93	86.32	5.96769e-05	4.6			YBR028C	YPK3	protein_coding	chrII	294425	296002	-1	39.87	20.31	0.0056935	2
YDR077W	SED1	protein_coding	chrIV	600793	601809	1	1150.41	5281.31	5.55111e-17	4.6			YGR061C	ADE6	protein_coding	chrVII	611889	615965	-1	350.01	175.54	5.55111e-17	2
YER092W	IES5	protein_coding	chrV	342855	343232	1	38.96	178.97	4.08603e-07	4.6			YKL216W	URA1	protein_coding	chrXI	25215	26159	1	793.27	391.85	5.55111e-17	2
YOR278W	HEM4	protein_coding	chrXV	842817	843644	1	14.55	66.65	4.88204e-06	4.6			YIL124W	AYR1	protein_coding	chrIX	126204	127097	1	100.32	49.78	0.000664272	2
YOR180C	DCI1	protein_coding	chrXV	674352	675167	-1	8.2	37.09	0.000757332	4.5			YJL042W	MHP1	protein_coding	chrX	361249	365445	1	48.16	23.75	2.66221e-07	2
YGR081C	SLX9	protein_coding	chrVII	643148	643780	-1	63.44	284.06	3.33067e-16	4.5			YJR046W	TAH11	protein_coding	chrX	522048	523862	1	54.58	27.46	0.000432046	2
YML077W	BET5	protein_coding	chrXIII	111865	112344	1	30.68	137.23	7.46859e-07	4.5			YHR154W	RTT107	protein_coding	chrVIII	402966	406178	1	35	17.18	0.000113656	2
YKL167C	MRP49	protein_coding	chrXI	133721	134134	-1	45.27	197.81	4.52936e-08	4.4			YNL138W	SRV2	protein_coding	chrXIV	366741	368321	1	160.03	79.95	1.40629e-08	2
YLR390W	ECM19	protein_coding	chrXII	903066	903404	1	51.33	225.82	1.15105e-07	4.4			YOR027W	STI1	protein_coding	chrXV	381053	382822	1	242.77	121.7	1.79412e-13	2
YBR054W	YRO2	protein_coding	chrII	343101	344135	1	55.61	242.53	5.55111e-17	4.4			YGL234W	ADE5,7	protein_coding	chrVII	56482	58890	1	535.12	268.26	5.55111e-17	2
YOR374W	ALD4	protein_coding	chrXV	1039840	1041399	1	33.47	148.36	5.55111e-17	4.4			YKL165C	MCD4	protein_coding	chrXI	137932	140691	-1	79.54	41.28	4.48372e-07	1.9
YHR191C	CTF8	protein_coding	chrVIII	486230	486631	-1	16.65	70.86	0.00141256	4.3			YJL157C	FAR1	protein_coding	chrX	123836	126328	-1	90.21	47.13	4.06855e-07	1.9
YBR262C	MIC12	protein_coding	chrII	735720	736040	-1	41.7	177.47	6.35343e-06	4.3			YJR126C	VPS70	protein_coding	chrX	656254	658689	-1	67.59	35.08	1.23685e-05	1.9
YMR132C	JLP2	protein_coding	chrXIII	534944	535570	-1	8.54	36.91	0.00379194	4.3			YLL024C	SSA2	protein_coding	chrXII	95566	97485	-1	3655.46	1929.56	5.55111e-17	1.9
YPL148C	PPT2	protein_coding	chrXVI	272294	272815	-1	10.26	44.34	0.00379194	4.3			YBL067C	UBP13	protein_coding	chrII	93639	95882	-1	72.18	37.29	1.29777e-05	1.9
YDR462W	MRPL28	protein_coding	chrIV	1386073	1386516	1	27.13	116.28	1.63784e-05	4.3			YBL047C	EDE1	protein_coding	chrII	127895	132040	-1	212.13	109.93	5.55111e-17	1.9
YAR033W	MST28	protein_coding	chrI	188107	188811	1	7.6	32.83	0.00379194	4.3			YNR016C	ACC1	protein_coding	chrXIV	654673	661374	-1	489.56	260.59	5.55111e-17	1.9
YJL072C	PSF2	protein_coding	chrX	305221	305862	-1	14.6	61.01	0.000202437	4.2			YNR050C	LYS9	protein_coding	chrXIV	714048	715388	-1	1769.88	921.34	5.55111e-17	1.9
YGR006W	PRP18	protein_coding	chrVII	506070	506825	1	10.62	44.74	0.000532406	4.2			YMR031C	EIS1	protein_coding	chrXIII	332212	334743	-1	46	24.61	0.000407546	1.9
YLL041C	SDH2	protein_coding	chrXII	53131	53931	-1	46.79	191.14	3.3995e-13	4.1			YMR116C	ASC1	protein_coding	chrXIII	499456	500688	-1	3078.98	1663.32	5.55111e-17	1.9
YBL064C	PRX1	protein_coding	chrII	100371	101156	-1	34.06	138.16	9.89343e-10	4.1			YMR165C	PAH1	protein_coding	chrXIII	590040	592628	-1	27.92	14.44	0.00362903	1.9
YDR019C	GCV1	protein_coding	chrIV	484163	485365	-1	62.31	247.14	5.55111e-17	4			YPL090C	RPS6A	protein_coding	chrXVI	377291	378395	-1	782.59	404.39	5.55111e-17	1.9
YLR121C	YPS3	protein_coding	chrXII	388744	390270	-1	77.14	308.95	5.55111e-17	4			YPR133C	SPN1	protein_coding	chrXVI	795978	797210	-1	62.97	33.21	0.00327002	1.9
YHR058C	MED6	protein_coding	chrVIII	218997	219884	-1	9.04	36.09	0.00097961	4			YDL182W	LYS20	protein_coding	chrIV	133437	134723	1	1304.31	673.65	5.55111e-17	1.9
YBL021C	HAP3	protein_coding	chrII	181660	182094	-1	15.39	61.39	0.00262012	4			YCL014W	BUD3	protein_coding	chrIII	96281	101191	1	44.98	24.29	1.52215e-06	1.9
YGR202C	PCT1	protein_coding	chrVII	903474	904748	-1	16.8	67.02	7.33094e-08	4			YLR253W	MCP2	protein_coding	chrXII	642627	644336	1	43.06	22.9	0.00462473	1.9
YFR036W	CDC26	protein_coding	chrVI	226963	227337	1	14.28	56.97	0.00711459	4			YLR367W	RPS22B	protein_coding	chrXII	856442	857317	1	686.13	363.78	4.44089e-16	1.9
YDL048C	STP4	protein_coding	chrIV	366739	368211	-1	99.97	386.75	5.55111e-17	3.9			YLR410W	VIP1	protein_coding	chrXII	937541	940981	1	64.58	33.63	4.27236e-07	1.9
YFR053C	HXK1	protein_coding	chrVI	253592	255049	-1	26.63	105.01	7.55063e-13	3.9			YHR012W	VPS29	protein_coding	chrVIII	129481	130448	1	59.46	31.27	0.0110121	1.9
YKL018W	SWD2	protein_coding	chrXI	404102	405091	1	29.75	116.89	4.89289e-10	3.9			YER148W	SPT15	protein_coding	chrV	465303	466025	1	138.86	71.41	0.00055587	1.9
YIR018W	YAP5	protein_coding	chrIX	384609	385346	1	18.14	69.96	3.75522e-05	3.9			YNL212W	VID27	protein_coding	chrXIV	247461	249809	1	42.74	22.74	0.000942509	1.9
YEL004W	YEA4	protein_coding	chrV	146951	147979	1	9.11	34.6	0.00067351	3.8			YKL024C	URA6	protein_coding	chrXI	392526	393140	-1	178.49	101.32	0.00158766	1.8
YNL038W	GPI15	protein_coding	chrXIV	557020	557783	1	29.79	111.85	1.61608e-07	3.8			YDL164C	CDC9	protein_coding	chrIV	164987	167254	-1	29.51	16.48	0.0115637	1.8
YMR009W	ADI1	protein_coding	chrXIII	284102	284641	1	22.31	85.72	9.7683e-05	3.8			YDR497C	ITR1	protein_coding	chrIV	1443713	1445467	-1	196.03	106.51	2.66231e-09	1.8
YMR123W	PKR1	protein_coding	chrXIII	513593	513961	1	116.09	443.86	2.60791e-13	3.8			YJL080C	SCP160	protein_coding	chrX	285558	289226	-1	226.94	125.67	5.55111e-17	1.8
YDR289C	RTT103	protein_coding	chrIV	1038280	1039509	-1	9.79	36.18	0.000175481	3.7			YLR259C	HSP60	protein_coding	chrXII	663284	665002	-1	478.14	269.27	5.55111e-17	1.8
YLR145W	RMP1	protein_coding	chrXII	432168	432773	1	11.04	41.13	0.00482855	3.7			YLR351C	NIT3	protein_coding	chrXII	829489	830364	-1	126.83	71.13	0.00121799	1.8
YKR065C	PAM17	protein_coding	chrXI	565299	565892	-1	90.14	320.69	2.5091e-14	3.6			YHR064C	SSZ1	protein_coding	chrVIII	225525	227141	-1	830.34	469.01	5.55111e-17	1.8
YBL074C	AAR2	protein_coding	chrII	86722	87789	-1	8.77	31.67	0.00121775	3.6			YER091C	MET6	protein_coding	chrV	339864	342167	-1	375.33	212.49	5.55111e-17	1.8
YNL230C	ELA1	protein_coding	chrXIV	217523	218662	-1	11.74	42.16	0.000120034	3.6			YBL007C	SLA1	protein_coding	chrII	212632	216366	-1	126.52	68.64	2.76257e-12	1.8
YNR022C	MRPL50	protein_coding	chrXIV	669774	670193	-1	51	182.27	1.28173e-06	3.6			YML072C	TCB3	protein_coding	chrXIII	124730	129367	-1	266.11	145.48	5.55111e-17	1.8
YPL055C	LGE1	protein_coding	chrXVI	453992	454990	-1	13.4	48.12	0.000120034	3.6			YMR076C	PDS5	protein_coding	chrXIII	416196	420029	-1	24.09	13.47	0.00304194	1.8
YPR131C	NAT3	protein_coding	chrXVI	793911	794498	-1	22.77	81.75	0.000120034	3.6			YPL240C	HSP82	protein_coding	chrXVI	96496	98625	-1	148.32	81.91	2.46461e-08	1.8
YOL119C	MCH4	protein_coding	chrXV	94856	96361	-1	14.22	50.83	1.28173e-06	3.6			YPR163C	TIF3	protein_coding	chrXVI	868645	869955	-1	385.97	215.91	4.26925e-12	1.8
YOR185C	GSP2	protein_coding	chrXV	681444	682106	-1	14.13	51.02	0.00121775	3.6			YOR086C	TCB1	protein_coding	chrXV	483219	486779	-1	78.19	42.49	8.68942e-08	1.8
YKL156W	RPS27A	protein_coding	chrXI	158613	159212	1	595.69	2163.03	5.55111e-17	3.6			YOR095C	RKI1	protein_coding	chrXV	503552	504328	-1	96.48	52.7	0.00581522	1.8
YPR020W	ATP20	protein_coding	chrXVI	599870	600217	1	57.7	209.75	1.862e-06	3.6			YKR090W	PXL1	protein_coding	chrXI	608946	611066	1	29.03	15.95	0.0131329	1.8
YPR157W	TDA6	protein_coding	chrXVI	841266	842669	1	32.42	115.39	2.06002e-12	3.6			YDR335W	MSN5	protein_coding	chrIV	1141168	1144842	1	35.33	19.38	0.000306571	1.8
YLR201C	COQ9	protein_coding	chrXII	549511	550293	-1	51.29	179.62	8.18e-11	3.5			YJR040W	GEF1	protein_coding	chrX	507746	510085	1	38.33	21.3	0.00323874	1.8
YDL181W	INH1	protein_coding	chrIV	135179	135436	1	25.94	89.7	0.0088305	3.5			YJR059W	PTK2	protein_coding	chrX	545787	548243	1	42.5	23.19	0.0011141	1.8
YLR258W	GSY2	protein_coding	chrXII	660716	662833	1	19.59	68.92	3.25646e-11	3.5			YJR092W	BUD4	protein_coding	chrX	598735	603078	1	37.9	20.49	3.39269e-05	1.8
YFL046W	FMP32	protein_coding	chrVI	42815	43438	1	12.87	45.65	0.00325524	3.5			YJR103W	URA8	protein_coding	chrX	620754	622490	1	63.19	35.87	0.00158766	1.8
YNL160W	YGP1	protein_coding	chrXIV	336545	337609	1	40.22	142.09	1.297e-11	3.5			YLR115W	CFT2	protein_coding	chrXII	377985	380564	1	39.95	22.08	0.00146611	1.8
YGR133W	PEX4	protein_coding	chrVII	756896	757447	1	12.13	41.93	0.0088305	3.5			YMR241W	YHM2	protein_coding	chrXIII	751961	752905	1	453.3	246.79	3.52949e-11	1.8
YDL133C-A	RPL41B	protein_coding	chrIV	221724	221801	-1	1767.69	6048.37	5.55111e-17	3.4			YPL231W	FAS2	protein_coding	chrXVI	108652	114315	1	492.3	269.05	5.55111e-17	1.8
YJL011C	RPC17	protein_coding	chrX	414285	414770	-1	24.79	84.25	0.000556759	3.4			YOL103W	ITR2	protein_coding	chrXV	124001	125830	1	99.48	54.48	1.84458e-05	1.8
YBR193C	MED8	protein_coding	chrII	609082	609753	-1	17.93	60.93	0.000556759	3.4			YOR096W	RPS7A	protein_coding	chrXV	505794	506767	1	1111.87	630.59	5.55111e-17	1.8
YOR161C	PNS1	protein_coding	chrXV	636939	638558	-1	29.75	100	8.70815e-12	3.4			YOR326W	MYO2	protein_coding	chrXV	925721	930445	1	118.14	65.56	1.8241e-13	1.8
YGR063C	SPT4	protein_coding	chrVII	617516	617824	-1	155.96	535.81	2.94165e-12	3.4			YDL145C	COP1	protein_coding	chrIV	194571	198176	-1	317.03	183.66	5.55111e-17	1.7
YKR091W	SRL3	protein_coding	chrXI	611525	612265	1	23.48	79.28	3.78784e-05	3.4			YDL055C	PSA1	protein_coding	chrIV	355674	356759	-1	1581.47	921.28	5.55111e-17	1.7
YIL122W	POG1	protein_coding	chrIX	130610	131665	1	11.41	38.77	0.000556759	3.4			YDR170C	SEC7	protein_coding	chrIV	796193	802222	-1	98.34	56.39	4.83613e-13	1.7
YLR200W	YKE2	protein_coding	chrXII	549012	549356	1	54.32	185.77	1.47349e-05	3.4			YDR238C	SEC26	protein_coding	chrIV	937895	940816	-1	174.09	100.53	3.50345e-11	1.7
YLR210W	CLB4	protein_coding	chrXII	562008	563390	1	10.65	36.04	0.000144313	3.4			YDR266C	HEL2	protein_coding	chrIV	1000104	1002023	-1	63.45	37.09	0.00147439	1.7
YHR071W	PCL5	protein_coding	chrVIII	237004	237693	1	83.42	281.23	7.30527e-14	3.4			YDR303C	RSC3	protein_coding	chrIV	1068729	1071386	-1	48.35	28.13	0.00100105	1.7
YML112W	CTK3	protein_coding	chrXIII	45063	45953	1	22.54	75.93	1.00348e-05	3.4			YDR407C	TRS120	protein_coding	chrIV	1284069	1287938	-1	33.55	19.32	0.000776324	1.7
YPL149W	ATG5	protein_coding	chrXVI	271310	272194	1	18.15	62.36	5.57335e-05	3.4			YJL212C	OPT1	protein_coding	chrX	33850	36249	-1	92.03	53.41	1.48315e-05	1.7
YOR349W	CIN1	protein_coding	chrXV	989789	992833	1	9.23	30.99	1.93717e-07	3.4			YJR045C	SSC1	protein_coding	chrX	519638	521602	-1	578.37	335.22	5.55111e-17	1.7
YDR219C	MFB1	protein_coding	chrIV	905455	906852	-1	14.36	47.12	1.74392e-05	3.3			YEL050C	RML2	protein_coding	chrV	59670	60851	-1	65.69	39.16	0.0139422	1.7
YDR309C	GIC2	protein_coding	chrIV	1079048	1080199	-1	65.07	216.35	5.55111e-17	3.3			YBR115C	LYS2	protein_coding	chrII	469748	473926	-1	344.35	199.8	5.55111e-17	1.7
YJL031C	BET4	protein_coding	chrX	386368	387438	-1	22.5	73.14	3.15203e-06	3.3			YNL301C	RPL18B	protein_coding	chrXIV	63570	64562	-1	211.65	123.7	2.94659e-05	1.7
YLL018C-A	COX19	protein_coding	chrXII	108676	108972	-1	40.56	131.87	0.000982181	3.3			YMR120C	ADE17	protein_coding	chrXIII	507502	509280	-1	494.37	283.2	5.55111e-17	1.7
YHL021C	AIM17	protein_coding	chrVIII	64462	65859	-1	17.24	56.03	3.15203e-06	3.3			YPL115C	BEM3	protein_coding	chrXVI	332100	335486	-1	28.85	17.35	0.0065312	1.7
YPR037C	ERV2	protein_coding	chrXVI	646448	647038	-1	20.39	66.27	0.000982181	3.3			YOL097C	WRS1	protein_coding	chrXV	136527	137825	-1	213.32	128.83	5.49746e-06	1.7
YAL044C	GCV3	protein_coding	chrI	57950	58462	-1	292.26	975.16	5.55111e-17	3.3			YAL023C	PMT2	protein_coding	chrI	106272	108551	-1	291.21	172.56	3.79807e-13	1.7
YIL116W	HIS5	protein_coding	chrIX	142928	144085	1	80.92	270.58	5.55111e-17	3.3			YAL005C	SSA1	protein_coding	chrI	139503	141431	-1	525.32	307.33	5.55111e-17	1.7
YDL099W	BUG1	protein_coding	chrIV	283419	284444	1	23.48	76.35	3.15203e-06	3.3			YGL147C	RPL9A	protein_coding	chrVII	227754	228329	-1	2944.54	1715.37	5.55111e-17	1.7
YLR226W	BUR2	protein_coding	chrXII	589354	590541	1	14.65	47.95	6.6063e-05	3.3			YGL084C	GUP1	protein_coding	chrVII	350616	352298	-1	90.67	53.95	0.000542804	1.7
YLR275W	SMD2	protein_coding	chrXII	694378	694800	1	31.65	105.22	0.000375417	3.3			YGL027C	CWH41	protein_coding	chrVII	443642	446143	-1	74.37	44.83	0.000186615	1.7
YMR043W	MCM1	protein_coding	chrXIII	353871	354731	1	54.42	179.89	3.72933e-11	3.3			YKL182W	FAS1	protein_coding	chrXI	100671	106826	1	1151.41	661.39	5.55111e-17	1.7
YMR263W	SAP30	protein_coding	chrXIII	794919	795524	1	28.72	94.01	6.6063e-05	3.3			YKL081W	TEF4	protein_coding	chrXI	282891	284455	1	2000.69	1146.66	5.55111e-17	1.7
YOR044W	IRC23	protein_coding	chrXV	413007	413480	1	28.24	93.9	0.000375417	3.3			YDL225W	SHS1	protein_coding	chrIV	52445	54100	1	53.35	32.25	0.0104058	1.7
YGR029W	ERV1	protein_coding	chrVII	543553	544205	1	12.3	40.89	0.00586785	3.3			YDL084W	SUB2	protein_coding	chrIV	305237	306577	1	810.57	488.55	5.55111e-17	1.7
YIL027C	EMC5	protein_coding	chrIX	303679	304104	-1	87.99	280	1.32981e-08	3.2			YJL117W	PHO86	protein_coding	chrX	192531	193466	1	277.45	163.57	4.65144e-06	1.7
YJL065C	DLS1	protein_coding	chrX	315054	315557	-1	55.78	180.15	5.7501e-07	3.2			YJL034W	KAR2	protein_coding	chrX	381327	383375	1	557.28	329.29	5.55111e-17	1.7
YLR254C	NDL1	protein_coding	chrXII	644404	644973	-1	16.44	53.1	0.00389651	3.2			YJR148W	BAT2	protein_coding	chrX	705744	706874	1	337.32	199.91	3.70897e-08	1.7
YHR198C	AIM18	protein_coding	chrVIII	496315	497280	-1	13.86	44.23	0.000657694	3.2			YLL021W	SPA2	protein_coding	chrXII	100947	105347	1	33.46	19.82	0.000622685	1.7
YER159C	BUR6	protein_coding	chrV	491530	491958	-1	71.77	228.24	2.6563e-07	3.2			YLR167W	RPS31	protein_coding	chrXII	498947	499405	1	6666.94	3874.72	5.55111e-17	1.7
YER175C	TMT1	protein_coding	chrV	539464	540363	-1	14.87	47.47	0.000657694	3.2			YHR023W	MYO1	protein_coding	chrVIII	151666	157452	1	37.94	22.46	2.87811e-05	1.7
YMR077C	VPS20	protein_coding	chrXIII	421484	422149	-1	20.1	64.15	0.000657694	3.2			YHR174W	ENO2	protein_coding	chrVIII	451327	452640	1	14571.2	8425.82	5.55111e-17	1.7
YAL014C	SYN8	protein_coding	chrI	128252	129019	-1	27.89	90.4	1.18196e-05	3.2			YEL071W	DLD3	protein_coding	chrV	16355	17845	1	325.01	189.85	2.15982e-10	1.7
YGL128C	CWC23	protein_coding	chrVII	269293	270144	-1	11	35.52	0.00389651	3.2			YMR186W	HSC82	protein_coding	chrXIII	632355	634472	1	2062.94	1203.66	5.55111e-17	1.7
YJR112W	NNF1	protein_coding	chrX	637030	637635	1	17.67	55.82	0.002588	3.2			YPR124W	CTR1	protein_coding	chrXVI	786208	787428	1	86.61	52.49	0.00525675	1.7
YER035W	EDC2	protein_coding	chrV	222639	223076	1	30.56	97.55	0.000657694	3.2			YOL004W	SIN3	protein_coding	chrXV	316938	321548	1	67.35	40.54	1.30451e-06	1.7
YPL070W	MUK1	protein_coding	chrXVI	420948	422786	1	11.65	37.75	1.18196e-05	3.2			YOR188W	MSB1	protein_coding	chrXV	685767	689180	1	25.49	14.6	0.00555204	1.7
YOR107W	RGS2	protein_coding	chrXV	521353	522282	1	30.23	95.71	9.85126e-07	3.2			YGL137W	SEC27	protein_coding	chrVII	249869	252738	1	185.64	112.28	3.25526e-10	1.7
YGR032W	GSC2	protein_coding	chrVII	548264	553951	1	15.3	48.51	5.55111e-17	3.2			YGL123W	RPS2	protein_coding	chrVII	277617	278381	1	4994.08	3022.98	5.55111e-17	1.7
YIL084C	SDS3	protein_coding	chrIX	202276	203259	-1	13.6	41.61	0.00114408	3.1			YGR167W	CLC1	protein_coding	chrVII	832456	833157	1	204.04	121.73	0.000851174	1.7
YDL175C	AIR2	protein_coding	chrIV	144484	145518	-1	12.93	39.56	0.00114408	3.1			YKL203C	TOR2	protein_coding	chrXI	55935	63359	-1	25.24	15.58	0.000324592	1.6
YDR449C	UTP6	protein_coding	chrIV	1357580	1358902	-1	25.3	79.39	1.22556e-07	3.1			YIL143C	SSL2	protein_coding	chrIX	80510	83041	-1	35.95	22.5	0.0145186	1.6
YJL024C	APS3	protein_coding	chrX	395931	396592	-1	20.22	61.85	0.00114408	3.1			YDL100C	GET3	protein_coding	chrIV	282112	283176	-1	372.05	235.7	6.25072e-07	1.6
YLR147C	SMD3	protein_coding	chrXII	434158	434463	-1	52.5	162.9	0.000294946	3.1			YDL019C	OSH2	protein_coding	chrIV	417663	421514	-1	42.74	26.81	0.00105746	1.6
YBL001C	ECM15	protein_coding	chrII	237153	237467	-1	123.24	378.66	2.60294e-08	3.1			YDR144C	MKC7	protein_coding	chrIV	744311	746101	-1	172.66	111.33	2.11947e-05	1.6
YAL048C	GEM1	protein_coding	chrI	52801	54789	-1	11.44	35.8	1.37518e-05	3.1			YJL176C	SWI3	protein_coding	chrX	92053	94530	-1	41.06	25.15	0.00720133	1.6
YGL032C	AGA2	protein_coding	chrVII	436570	436833	-1	238.32	735.04	1.112e-12	3.1			YJL141C	YAK1	protein_coding	chrX	147967	150390	-1	34.79	21.3	0.0143358	1.6
YGR120C	COG2	protein_coding	chrVII	730033	730821	-1	16.97	51.9	0.00114408	3.1			YJL124C	LSM1	protein_coding	chrX	187126	187644	-1	208.92	130.35	0.00729758	1.6
YKL095W	YJU2	protein_coding	chrXI	262277	263113	1	14.39	44.67	0.00172	3.1			YJR145C	RPS4A	protein_coding	chrX	702027	703068	-1	1761.3	1108.83	5.55111e-17	1.6
YKL007W	CAP1	protein_coding	chrXI	429302	430108	1	43.13	132.36	1.41103e-07	3.1			YFR031C-A	RPL2A	protein_coding	chrVI	220507	221418	-1	1996.21	1278.6	5.55111e-17	1.6
YMR191W	SPG5	protein_coding	chrXIII	645656	646777	1	35.79	109.48	1.76653e-08	3.1			YBR181C	RPS6B	protein_coding	chrII	591712	592774	-1	901.66	552.67	2.22045e-16	1.6
YPL173W	MRPL40	protein_coding	chrXVI	223143	224036	1	16.47	51.78	0.000440397	3.1			YBR196C	PGI1	protein_coding	chrII	612236	613900	-1	2666.02	1663.73	5.55111e-17	1.6
YOL154W	ZPS1	protein_coding	chrXV	34658	35407	1	10.71	33.23	0.0104819	3.1			YBR276C	PPS1	protein_coding	chrII	757620	760043	-1	50.25	32.32	0.00728672	1.6
YOL146W	PSF3	protein_coding	chrXV	48864	49448	1	29.75	91.3	0.000197594	3.1			YPL106C	SSE1	protein_coding	chrXVI	350194	352275	-1	1376.57	857.64	5.55111e-17	1.6
YOR319W	HSH49	protein_coding	chrXV	912822	913463	1	18.77	58.23	0.00172	3.1			YPR074C	TKL1	protein_coding	chrXVI	692796	694838	-1	1510.31	939.37	5.55111e-17	1.6
YGR230W	BNS1	protein_coding	chrVII	951894	952307	1	19.4	60.2	0.0104819	3.1			YGL206C	CHC1	protein_coding	chrVII	102543	107504	-1	238.48	153.56	1.11022e-16	1.6
YKR046C	PET10	protein_coding	chrXI	524223	525074	-1	43.99	133.73	6.48123e-08	3			YGL201C	MCM6	protein_coding	chrVII	117854	120907	-1	43.83	26.81	0.00200913	1.6
YDR529C	QCR7	protein_coding	chrIV	1496165	1496548	-1	170.82	505.34	4.04243e-12	3			YGR123C	PPT1	protein_coding	chrVII	736662	738203	-1	126.75	80.82	0.000548013	1.6
YJR010C-A	SPC1	protein_coding	chrX	458077	458361	-1	51.67	156.16	0.000761702	3			YGR245C	SDA1	protein_coding	chrVII	979765	982068	-1	99.35	63.36	0.000184671	1.6
YLR051C	FCF2	protein_coding	chrXII	246324	246977	-1	51.17	152.44	5.94127e-07	3			YIL156W	UBP7	protein_coding	chrIX	48091	51306	1	26.22	16.05	0.0143358	1.6
YLR363C	NMD4	protein_coding	chrXII	852495	853151	-1	32.6	97.55	5.95559e-05	3			YIL015W	BAR1	protein_coding	chrIX	322342	324105	1	231.45	146.34	3.81995e-07	1.6
YPR107C	YTH1	protein_coding	chrXVI	741438	742064	-1	14.94	45.43	0.00688213	3			YDL229W	SSB1	protein_coding	chrIV	44065	45906	1	3831.32	2422.02	5.55111e-17	1.6
YOR297C	TIM18	protein_coding	chrXV	874743	875321	-1	71.67	212.16	3.384e-08	3			YDL112W	TRM3	protein_coding	chrIV	258915	263225	1	69.25	43.77	1.40488e-05	1.6
YKR060W	UTP30	protein_coding	chrXI	556518	557342	1	25.96	77.68	5.95559e-05	3			YDR062W	LCB2	protein_coding	chrIV	576474	578159	1	254.07	161.56	2.6845e-07	1.6
YDR156W	RPA14	protein_coding	chrIV	769525	769938	1	197.24	589.12	5.21805e-15	3			YCL018W	LEU2	protein_coding	chrIII	91324	92418	1	83.13	52.03	0.0145186	1.6
YDR525W-A	SNA2	protein_coding	chrIV	1490596	1490835	1	111.55	333.8	7.17538e-06	3			YJL197W	UBP12	protein_coding	chrX	63805	67569	1	31.29	19.39	0.00462415	1.6
YJR006W	POL31	protein_coding	chrX	449202	450665	1	13.72	41.35	8.87872e-05	3			YJL111W	CCT7	protein_coding	chrX	207877	209529	1	144.15	89.39	5.7735e-05	1.6
YEL062W	NPR2	protein_coding	chrV	34407	36254	1	13.76	41.42	1.06541e-05	3			YJL005W	CYR1	protein_coding	chrX	425157	431237	1	36.76	22.54	7.03153e-05	1.6
YER074W-A	YOS1	protein_coding	chrV	307653	308123	1	25.58	75.6	0.00298767	3			YJR147W	HMS2	protein_coding	chrX	704196	705272	1	113.11	71.08	0.00501974	1.6
YBR175W	SWD3	protein_coding	chrII	582408	583355	1	50.83	152.11	1.72439e-09	3			YFL007W	BLM10	protein_coding	chrVI	123479	129910	1	68.89	43.73	1.5321e-07	1.6
YMR042W	ARG80	protein_coding	chrXIII	352603	353136	1	20.05	60.01	0.00452942	3			YFL004W	VTC2	protein_coding	chrVI	131810	134296	1	108.73	68.72	3.54921e-05	1.6
YOR382W	FIT2	protein_coding	chrXV	1059531	1059992	1	31.87	96.34	0.000761702	3			YEL042W	GDA1	protein_coding	chrV	73771	75327	1	241.59	148.64	2.96497e-07	1.6
YGR028W	MSP1	protein_coding	chrVII	542203	543291	1	14.75	44.14	0.000507599	3			YBL011W	SCT1	protein_coding	chrII	203538	205817	1	88.66	56.22	0.000381562	1.6
YGR058W	PEF1	protein_coding	chrVII	606136	607143	1	10.62	31.79	0.00452942	3			YBR041W	FAT1	protein_coding	chrII	318266	320275	1	101.9	64.66	0.000354819	1.6
YGR222W	PET54	protein_coding	chrVII	939923	940804	1	12.14	36.33	0.00452942	3			YNL094W	APP1	protein_coding	chrXIV	447611	449374	1	57.67	35.32	0.00720133	1.6
YIL157C	COA1	protein_coding	chrIX	46949	47542	-1	45.07	131.87	1.21108e-05	2.9			YML017W	PSP2	protein_coding	chrXIII	236588	238731	1	49.32	30.72	0.00786553	1.6
YIL087C	AIM19	protein_coding	chrIX	199646	200119	-1	48.01	138.97	6.75889e-05	2.9			YOL076W	MDM20	protein_coding	chrXV	187024	189414	1	49.27	30.53	0.00462415	1.6
YJR025C	BNA1	protein_coding	chrX	471138	471671	-1	40.11	116.68	0.000100997	2.9			YGL022W	STT3	protein_coding	chrVII	452404	454560	1	206.66	131.23	1.42812e-07	1.6
YLR292C	SEC72	protein_coding	chrXII	719789	720370	-1	110.4	321.18	1.64457e-11	2.9			YIL088C	AVT7	protein_coding	chrIX	197931	199403	-1	107.24	70.1	0.00312653	1.5
YER144C	UBP5	protein_coding	chrV	457806	460223	-1	11.07	32.4	1.21108e-05	2.9			YDL190C	UFD2	protein_coding	chrIV	118707	121592	-1	71.89	49.35	0.00238979	1.5
YGL070C	RPB9	protein_coding	chrVII	374459	374827	-1	61.67	178.51	6.75889e-05	2.9			YDR346C	SVF1	protein_coding	chrIV	1167214	1168659	-1	230.51	152.67	2.97753e-05	1.5
YGR030C	POP6	protein_coding	chrVII	545681	546157	-1	33.68	97.04	0.00086738	2.9			YJL020C	BBC1	protein_coding	chrX	398937	402410	-1	52.02	34.33	0.0019556	1.5
YGR161C	RTS3	protein_coding	chrVII	808629	809420	-1	25.35	74.18	0.000151032	2.9			YLR044C	PDC1	protein_coding	chrXII	232390	234081	-1	11897.4	7787.12	5.55111e-17	1.5
YKL137W	CMC1	protein_coding	chrXI	185957	186292	1	39.84	116.57	0.00197474	2.9			YLR304C	ACO1	protein_coding	chrXII	735212	737548	-1	666.17	431.93	5.55111e-17	1.5
YDR003W	RCR2	protein_coding	chrIV	454122	454754	1	29.61	87.19	0.000226037	2.9			YHR158C	KEL1	protein_coding	chrVIII	413685	417179	-1	52.86	35.66	0.00284533	1.5
YDR363W-A	SEM1	protein_coding	chrIV	1202128	1202397	1	228.06	659.36	5.92395e-11	2.9			YHR203C	RPS4B	protein_coding	chrVIII	504476	505530	-1	1573.38	1027.67	5.55111e-17	1.5
YDR489W	SLD5	protein_coding	chrIV	1431012	1431896	1	39.33	112.65	1.12431e-06	2.9			YFR024C-A	LSB3	protein_coding	chrVI	201960	203433	-1	87.18	59.18	0.0141482	1.5
YHR148W	IMP3	protein_coding	chrVIII	393534	394085	1	58.2	167.71	2.47935e-06	2.9			YER105C	NUP157	protein_coding	chrV	367838	372013	-1	63.15	40.93	0.00010169	1.5
YBR268W	MRPL37	protein_coding	chrII	741299	741616	1	84.19	240.73	2.03406e-05	2.9			YER114C	BOI2	protein_coding	chrV	390590	393712	-1	40.29	26.22	0.00777554	1.5
YNL300W	TOS6	protein_coding	chrXIV	65744	66052	1	155.96	449.39	8.00614e-09	2.9			YER155C	BEM2	protein_coding	chrV	476345	482848	-1	97.56	65.97	3.78295e-08	1.5
YPL196W	OXR1	protein_coding	chrXVI	175043	175864	1	16.29	47.65	0.00197474	2.9			YBL076C	ILS1	protein_coding	chrII	81043	84261	-1	639.17	413.68	5.55111e-17	1.5
YOL072W	THP1	protein_coding	chrXV	194970	196337	1	19.57	55.96	2.03406e-05	2.9			YBL017C	PEP1	protein_coding	chrII	186844	191583	-1	72.58	47.7	1.61596e-05	1.5
YOR220W	RCN2	protein_coding	chrXV	755328	756125	1	48.65	142.78	1.23826e-07	2.9			YBR086C	IST2	protein_coding	chrII	420201	423041	-1	367.52	250.03	3.45324e-12	1.5
YGR203W	YCH1	protein_coding	chrVII	905237	905683	1	29.95	87.62	0.00197474	2.9			YBR121C	GRS1	protein_coding	chrII	481364	483367	-1	533.72	351.79	4.15223e-14	1.5
YKL122C	SRP21	protein_coding	chrXI	212495	212998	-1	114.21	317.91	1.41515e-09	2.8			YNL313C	EMW1	protein_coding	chrXIV	45308	48022	-1	80.37	52.46	0.000494373	1.5
YKL040C	NFU1	protein_coding	chrXI	361058	361828	-1	65.98	184.72	1.0019e-08	2.8			YML130C	ERO1	protein_coding	chrXIII	11483	13174	-1	117.09	76.81	0.0010187	1.5
YDL067C	COX9	protein_coding	chrIV	334217	334396	-1	185.92	524.19	2.78067e-06	2.8			YML085C	TUB1	protein_coding	chrXIII	97941	99400	-1	286.07	186.56	1.37712e-06	1.5
YDL053C	PBP4	protein_coding	chrIV	361699	362256	-1	71.97	204.19	2.321e-07	2.8			YML008C	ERG6	protein_coding	chrXIII	251839	252990	-1	250.99	162.26	4.31307e-05	1.5
YCR020C-A	MAK31	protein_coding	chrIII	154830	155096	-1	105.29	293.38	2.2764e-05	2.8			YMR089C	YTA12	protein_coding	chrXIII	445609	448086	-1	63.2	43.11	0.00738281	1.5
YJL170C	ASG7	protein_coding	chrX	101150	101779	-1	17	48.04	0.00785188	2.8			YMR212C	EFR3	protein_coding	chrXIII	690695	693043	-1	119.1	81.85	0.000437391	1.5
YJL078C	PRY3	protein_coding	chrX	291336	293981	-1	53.63	151.38	5.55111e-17	2.8			YMR229C	RRP5	protein_coding	chrXIII	725934	731123	-1	214.85	147.84	2.5836e-12	1.5
YNL254C	RTC4	protein_coding	chrXIV	168043	169248	-1	11.1	31	0.00337945	2.8			YPL009C	TAE2	protein_coding	chrXVI	535820	538936	-1	42.09	28.56	0.0130906	1.5
YMR112C	MED11	protein_coding	chrXIII	494100	494495	-1	47.33	130.37	0.000645495	2.8			YPR091C	NVJ2	protein_coding	chrXVI	716156	718468	-1	63.08	43.1	0.0100321	1.5
YOR357C	SNX3	protein_coding	chrXV	1009224	1009712	-1	38.33	109.22	0.000383314	2.8			YOL027C	MDM38	protein_coding	chrXV	272003	273724	-1	102.61	70.3	0.00487327	1.5
YGR207C	CIR1	protein_coding	chrVII	910843	911628	-1	37.47	104.19	1.52579e-05	2.8			YOR151C	RPB2	protein_coding	chrXV	612997	616671	-1	139.15	93.49	5.45946e-07	1.5
YDR287W	INM2	protein_coding	chrIV	1035995	1036873	1	15.23	42.53	0.00337945	2.8			YOR175C	ALE1	protein_coding	chrXV	659815	661674	-1	160.49	110.07	0.000262195	1.5
YJL189W	RPL39	protein_coding	chrX	75933	76474	1	284.03	798.17	5.55111e-17	2.8			YKL191W	DPH2	protein_coding	chrXI	81035	82639	1	112.6	75.43	0.0027149	1.5
YBL016W	FUS3	protein_coding	chrII	192451	193512	1	39.08	108.96	2.5905e-07	2.8			YKL073W	LHS1	protein_coding	chrXI	296430	299075	1	63.24	41.04	0.00202228	1.5
YNL145W	MFA2	protein_coding	chrXIV	352414	352530	1	1212.78	3347.53	5.55111e-17	2.8			YKL038W	RGT1	protein_coding	chrXI	365605	369117	1	37.34	25.34	0.0130906	1.5
YNL107W	YAF9	protein_coding	chrXIV	420098	420778	1	15.73	44.44	0.00785188	2.8			YDL014W	NOP1	protein_coding	chrIV	427364	428347	1	476.14	327.47	5.56804e-06	1.5
YPR101W	SNT309	protein_coding	chrXVI	730492	731019	1	40.56	114.64	0.000170248	2.8			YDR321W	ASP1	protein_coding	chrIV	1108702	1109847	1	373.79	247	1.9738e-06	1.5
YOR104W	PIN2	protein_coding	chrXV	517642	518490	1	12.61	35.65	0.00785188	2.8			YLR214W	FRE1	protein_coding	chrXII	568567	570627	1	74.04	48.37	0.0036356	1.5
YOR257W	CDC31	protein_coding	chrXV	811008	811493	1	24.79	69.6	0.00514292	2.8			YLR249W	YEF3	protein_coding	chrXII	636780	639914	1	6309.32	4144.32	5.55111e-17	1.5
YGR049W	SCM4	protein_coding	chrVII	591314	591877	1	30.86	85.23	0.00097347	2.8			YLR359W	ADE13	protein_coding	chrXII	844282	845730	1	453.6	297.33	2.0548e-09	1.5
YDL065C	PEX19	protein_coding	chrIV	336249	337277	-1	13.01	34.6	0.00572899	2.7			YHR146W	CRP1	protein_coding	chrVIII	390300	391697	1	93.84	63.67	0.0130906	1.5
YDR487C	RIB3	protein_coding	chrIV	1428354	1428980	-1	249.79	672.93	5.55111e-17	2.7			YEL022W	GEA2	protein_coding	chrV	111421	115800	1	59.29	40.24	0.000483985	1.5
YHL031C	GOS1	protein_coding	chrVIII	38815	39486	-1	25.9	68.88	0.00163162	2.7			YNL287W	SEC21	protein_coding	chrXIV	91994	94801	1	249.8	162.94	3.968e-10	1.5
YHR003C	TCD1	protein_coding	chrVIII	110028	111317	-1	36.32	99.36	8.80869e-08	2.7			YNL243W	SLA2	protein_coding	chrXIV	188051	190957	1	76.9	50.22	0.000426714	1.5
YFL028C	CAF16	protein_coding	chrVI	79344	80213	-1	36.93	100.27	1.13505e-05	2.7			YPL265W	DIP5	protein_coding	chrXVI	41043	42869	1	131.89	86.72	0.000312686	1.5
YBR167C	POP7	protein_coding	chrII	571468	571890	-1	25.32	67.34	0.0134655	2.7			YPL160W	CDC60	protein_coding	chrXVI	246990	250262	1	316.15	206.69	3.9968e-14	1.5
YNL305C	BXI1	protein_coding	chrXIV	58898	59791	-1	26.95	71.69	0.000209876	2.7			YPL085W	SEC16	protein_coding	chrXVI	387067	393654	1	40.64	26.75	0.000150346	1.5
YML043C	RRN11	protein_coding	chrXIII	190244	191767	-1	21.96	58.41	1.25084e-05	2.7			YPL028W	ERG10	protein_coding	chrXVI	498096	499292	1	504.37	339.1	5.46064e-08	1.5
YPL007C	TFC8	protein_coding	chrXVI	542082	543848	-1	12.12	33.25	0.000285154	2.7			YOR165W	SEY1	protein_coding	chrXV	644566	646896	1	72.93	47.35	0.00187674	1.5
YPL002C	SNF8	protein_coding	chrXVI	553627	554328	-1	17.16	45.65	0.00876416	2.7			YAL042W	ERV46	protein_coding	chrI	61316	62563	1	256.36	166.9	2.2258e-05	1.5
YPR156C	TPO3	protein_coding	chrXVI	837909	839777	-1	78.07	212.41	5.55111e-17	2.7			YAL035W	FUN12	protein_coding	chrI	76427	79435	1	259.36	170.4	8.05672e-11	1.5
YOR221C	MCT1	protein_coding	chrXV	756476	757558	-1	33.37	88.77	5.62777e-06	2.7			YAR042W	SWH1	protein_coding	chrI	192619	196185	1	40.53	26.45	0.00456192	1.5
YGL054C	ERV14	protein_coding	chrVII	400871	401287	-1	282.49	755.66	1.11022e-16	2.7			YGL207W	SPT16	protein_coding	chrVII	98969	102076	1	100.35	66.45	5.3173e-05	1.5
YKL141W	SDH3	protein_coding	chrXI	179667	180263	1	159.2	435.38	2.62013e-14	2.7			YGR094W	VAS1	protein_coding	chrVII	672186	675500	1	404.22	273.35	1.33227e-15	1.5
YKL120W	OAC1	protein_coding	chrXI	217344	218318	1	38.44	102.25	3.77829e-06	2.7			YGR116W	SPT6	protein_coding	chrVII	720409	724764	1	100.18	66.62	2.18247e-06	1.5
YKL096W	CWP1	protein_coding	chrXI	261132	261851	1	146.88	393.14	4.996e-15	2.7			YGR118W	RPS23A	protein_coding	chrVII	726974	727730	1	717.95	484.46	3.13849e-07	1.5
YDL232W	OST4	protein_coding	chrIV	38487	38597	1	229.14	609.46	0.00013987	2.7			YGR124W	ASN2	protein_coding	chrVII	739944	741662	1	683.73	444.29	3.33067e-16	1.5
YDR140W	MTQ2	protein_coding	chrIV	734138	734803	1	56.28	149.69	3.77829e-06	2.7			YGR234W	YHB1	protein_coding	chrVII	959904	961103	1	532.11	354.57	1.18228e-08	1.5
YDR469W	SDC1	protein_coding	chrIV	1399015	1399542	1	27.89	74.18	0.00375842	2.7			YKL060C	FBA1	protein_coding	chrXI	326408	327487	-1	11657.3	8477.74	5.55111e-17	1.4
YLR356W	ATG33	protein_coding	chrXII	840321	840914	1	45.07	122.88	5.64786e-05	2.7			YIR006C	PAN1	protein_coding	chrIX	365466	369908	-1	78.03	56.5	0.000632631	1.4
YER112W	LSM4	protein_coding	chrV	387232	387795	1	68.83	183.08	2.538e-06	2.7			YDR326C	YSP2	protein_coding	chrIV	1120609	1124925	-1	128.07	94.02	3.41656e-05	1.4
YNL336W	COS1	protein_coding	chrXIV	8330	9475	1	17.52	48.16	0.000428716	2.7			YHL003C	LAG1	protein_coding	chrVIII	100648	101883	-1	145.13	102.26	0.00816481	1.4
YML058W	SML1	protein_coding	chrXIII	159383	159697	1	709.69	1887.66	5.55111e-17	2.7			YHR047C	AAP1	protein_coding	chrVIII	198740	201310	-1	128.61	94.86	0.00157897	1.4
YMR286W	MRPL33	protein_coding	chrXIII	841942	842202	1	56.42	150.06	0.00375842	2.7			YHR098C	SFB3	protein_coding	chrVIII	299145	301934	-1	139.14	100.18	0.000239822	1.4
YPL239W	YAR1	protein_coding	chrXVI	99484	100086	1	75.48	200.76	3.49589e-07	2.7			YHR188C	GPI16	protein_coding	chrVIII	482005	483837	-1	99.32	71.87	0.0131419	1.4
YPL135W	ISU1	protein_coding	chrXVI	297553	298050	1	266.11	725.69	5.55111e-17	2.7			YFL045C	SEC53	protein_coding	chrVI	43628	44392	-1	810.18	591.1	7.84545e-06	1.4
YOR286W	RDL2	protein_coding	chrXV	850280	850729	1	113.04	300.67	7.20877e-08	2.7			YER008C	SEC3	protein_coding	chrV	167808	171818	-1	50.06	36.84	0.0131337	1.4
YGR023W	MTL1	protein_coding	chrVII	529264	530919	1	12.93	34.4	0.000474371	2.7			YER110C	KAP123	protein_coding	chrV	378762	382103	-1	600.42	420.83	5.55111e-17	1.4
YJL079C	PRY1	protein_coding	chrX	289875	290774	-1	52.06	134.51	6.20137e-07	2.6			YBR127C	VMA2	protein_coding	chrII	491269	492822	-1	830.4	603.74	7.29003e-11	1.4
YBR230C	OM14	protein_coding	chrII	679549	680050	-1	74.67	195.05	6.16449e-06	2.6			YBR162C	TOS1	protein_coding	chrII	563203	564570	-1	746.62	523.15	1.51161e-10	1.4
YNL099C	OCA1	protein_coding	chrXIV	438567	439283	-1	33.61	86.9	0.000345556	2.6			YNL271C	BNI1	protein_coding	chrXIV	129522	135383	-1	50.01	35.53	0.00093623	1.4
YML092C	PRE8	protein_coding	chrXIII	85987	86739	-1	158.22	413.74	6.66134e-16	2.6			YML056C	IMD4	protein_coding	chrXIII	162194	164176	-1	505.62	360.9	1.50031e-09	1.4
YOR079C	ATX2	protein_coding	chrXV	473475	474416	-1	28.42	73.71	0.000153267	2.6			YMR243C	ZRC1	protein_coding	chrXIII	754838	756166	-1	470.39	328.19	4.09212e-07	1.4
YGL246C	RAI1	protein_coding	chrVII	37617	38780	-1	35.65	93.3	1.86821e-06	2.6			YPR033C	HTS1	protein_coding	chrXVI	637379	639019	-1	249.62	183.34	0.000367473	1.4
YGL087C	MMS2	protein_coding	chrVII	346406	346904	-1	37.56	96.33	0.00178866	2.6			YOR048C	RAT1	protein_coding	chrXV	418630	421650	-1	84.63	58.93	0.00113197	1.4
YGR138C	TPO2	protein_coding	chrVII	763762	765606	-1	51.51	133.16	1.21614e-12	2.6			YOR116C	RPO31	protein_coding	chrXV	539763	544145	-1	124	88.55	8.79125e-06	1.4
YKR013W	PRY2	protein_coding	chrXI	463959	464948	1	237.98	616.8	5.55111e-17	2.6			YOR254C	SEC63	protein_coding	chrXV	805032	807023	-1	206.31	143.89	3.95301e-05	1.4
YIR022W	SEC11	protein_coding	chrIX	398733	399236	1	77.02	201.34	4.13847e-06	2.6			YGL167C	PMR1	protein_coding	chrVII	187616	190468	-1	199.41	143.52	8.54789e-06	1.4
YDR096W	GIS1	protein_coding	chrIV	637139	639823	1	17.95	46.41	4.17543e-07	2.6			YGR264C	MES1	protein_coding	chrVII	1019598	1021853	-1	370.85	259.62	6.27373e-09	1.4
YDR461W	MFA1	protein_coding	chrIV	1385176	1385286	1	615.05	1571.77	2.96582e-09	2.6			YKL212W	SAC1	protein_coding	chrXI	34543	36414	1	165.9	122.68	0.00237118	1.4
YDR513W	GRX2	protein_coding	chrIV	1471017	1471448	1	254.09	651.12	4.35207e-14	2.6			YKL210W	UBA1	protein_coding	chrXI	39163	42237	1	259.02	188.16	2.88984e-07	1.4
YJR086W	STE18	protein_coding	chrX	586068	586400	1	68.34	176.42	0.000519907	2.6			YKL035W	UGP1	protein_coding	chrXI	369891	371390	1	241.85	173.28	0.000319919	1.4
YJR135W-A	TIM8	protein_coding	chrX	676971	677234	1	76.06	195.56	0.0011826	2.6			YIL078W	THS1	protein_coding	chrIX	212499	214703	1	520.88	375.43	2.9989e-10	1.4
YLL014W	EMC6	protein_coding	chrXII	121322	121648	1	171.94	440.99	6.31564e-08	2.6			YDL185W	VMA1	protein_coding	chrIV	126787	130002	1	765.05	535.85	5.55111e-17	1.4
YLR052W	IES3	protein_coding	chrXII	247201	247953	1	32	82.75	0.000345556	2.6			YDR150W	NUM1	protein_coding	chrIV	755628	763874	1	50.32	34.97	3.08862e-05	1.4
YEL003W	GIM4	protein_coding	chrV	148176	148599	1	53.67	138.56	0.000519907	2.6			YDR226W	ADK1	protein_coding	chrIV	916486	917154	1	972.46	681.24	3.15231e-07	1.4
YBL054W	TOD6	protein_coding	chrII	117589	119166	1	44.11	113.95	1.2489e-09	2.6			YDR395W	SXM1	protein_coding	chrIV	1263324	1266158	1	150.15	110.52	0.00030779	1.4
YNL119W	NCS2	protein_coding	chrXIV	401040	402521	1	32.52	84.09	4.17543e-07	2.6			YCR012W	PGK1	protein_coding	chrIII	137746	138996	1	7816.75	5696.6	5.55111e-17	1.4
YMR072W	ABF2	protein_coding	chrXIII	411569	412120	1	186.73	493.45	2.84217e-14	2.6			YJL186W	MNN5	protein_coding	chrX	80155	81915	1	184.72	135.47	0.00142724	1.4
YMR251W-A	HOR7	protein_coding	chrXIII	774752	774931	1	297.48	781.34	5.3236e-08	2.6			YJL167W	ERG20	protein_coding	chrX	105014	106072	1	264.19	189.96	0.00175159	1.4
YPL183W-A	RTC6	protein_coding	chrXVI	199095	199376	1	75.95	195.7	0.000783438	2.6			YLR056W	ERG3	protein_coding	chrXII	253861	254958	1	597.39	415.07	1.58869e-07	1.4
YPR066W	UBA3	protein_coding	chrXVI	681213	682112	1	19.34	49.45	0.00271141	2.6			YLR180W	SAM1	protein_coding	chrXII	515262	516410	1	1103.3	763.86	1.95621e-13	1.4
YPR154W	PIN3	protein_coding	chrXVI	834565	835212	1	92.96	244.51	7.45767e-09	2.6			YLR248W	RCK2	protein_coding	chrXII	634252	636084	1	97.86	69.93	0.0108066	1.4
YOL042W	NGL1	protein_coding	chrXV	249825	250916	1	19.61	50.54	0.000783438	2.6			YHR068W	DYS1	protein_coding	chrVIII	232133	233296	1	295.56	206.48	0.000180303	1.4
YKL138C	MRPL31	protein_coding	chrXI	185286	185681	-1	54.09	134.87	0.00128388	2.5			YBR106W	PHO88	protein_coding	chrII	452658	453224	1	1019.91	747.28	2.00923e-05	1.4
YIL007C	NAS2	protein_coding	chrIX	342994	343656	-1	20.19	51.02	0.00961105	2.5			YNL220W	ADE12	protein_coding	chrXIV	234413	235714	1	268.34	191.43	0.000351945	1.4
YDR378C	LSM6	protein_coding	chrIV	1229349	1229609	-1	215.41	538.86	1.62385e-07	2.5			YNL085W	MKT1	protein_coding	chrXIV	467131	469623	1	212.64	156.39	5.42912e-05	1.4
YDR410C	STE14	protein_coding	chrIV	1292372	1293091	-1	68.79	170.61	1.16643e-06	2.5			YMR012W	CLU1	protein_coding	chrXIII	291134	294967	1	322.26	230.78	2.91411e-11	1.4
YEL017C-A	PMP2	protein_coding	chrV	122798	122929	-1	1115.53	2764.82	5.55111e-17	2.5			YOR109W	INP53	protein_coding	chrXV	525278	528601	1	54.37	39.1	0.0119306	1.4
YER044C	ERG28	protein_coding	chrV	237570	238016	-1	104.82	258.88	2.57298e-06	2.5			YOR168W	GLN4	protein_coding	chrXV	649303	651732	1	236.33	169.97	7.44025e-06	1.4
YBR125C	PTC4	protein_coding	chrII	487199	488380	-1	39.64	100.91	1.00057e-06	2.5			YOR341W	RPA190	protein_coding	chrXV	960987	965981	1	270.68	194.24	4.61486e-12	1.4
YBR156C	SLI15	protein_coding	chrII	551104	553200	-1	12.77	31.41	0.000405469	2.5			YGL253W	HXK2	protein_coding	chrVII	23935	25395	1	1709.72	1185.63	5.55111e-17	1.4
YBR173C	UMP1	protein_coding	chrII	581726	582172	-1	155.73	386.32	8.15982e-09	2.5			YGL014W	PUF4	protein_coding	chrVII	466141	468807	1	106.91	77.43	0.00196331	1.4
YNL148C	ALF1	protein_coding	chrXIV	349907	350671	-1	15.75	39.56	0.0147678	2.5			YGR204W	ADE3	protein_coding	chrVII	905934	908774	1	323.23	229.98	5.38016e-09	1.4
YNL031C	HHT2	protein_coding	chrXIV	575640	576050	-1	1205.1	3032.1	5.55111e-17	2.5			YKL029C	MAE1	protein_coding	chrXI	382716	384725	-1	170.49	126.66	0.00164469	1.3
YNL024C-A	KSH1	protein_coding	chrXIV	586602	586820	-1	79.46	195.1	0.00446414	2.5			YKR001C	VPS1	protein_coding	chrXI	440608	442722	-1	143.04	108.58	0.00581239	1.3
YPL159C	PET20	protein_coding	chrXVI	250907	251668	-1	47.43	116.82	3.88037e-05	2.5			YDR135C	YCF1	protein_coding	chrIV	723004	727551	-1	136.87	104.51	0.000105676	1.3
YOL136C	PFK27	protein_coding	chrXV	67561	68754	-1	146.87	368.28	5.55111e-17	2.5			YCL030C	HIS4	protein_coding	chrIII	65934	68333	-1	254.34	195.09	0.000156513	1.3
YOR250C	CLP1	protein_coding	chrXV	800970	802307	-1	31.01	78.5	4.89312e-06	2.5			YJR139C	HOM6	protein_coding	chrX	689445	690524	-1	681.71	527.49	5.71627e-05	1.3
YDL170W	UGA3	protein_coding	chrIV	156318	157904	1	17.71	43.75	0.000270155	2.5			YJR143C	PMT4	protein_coding	chrX	698326	700614	-1	380.13	297.88	3.01177e-05	1.3
YDL004W	ATP16	protein_coding	chrIV	443029	443511	1	135.8	342.79	1.03935e-08	2.5			YLL018C	DPS1	protein_coding	chrXII	109902	111575	-1	304.67	226.52	0.000127934	1.3
YJL140W	RPB4	protein_coding	chrX	150961	151626	1	44.22	109.6	0.000180204	2.5			YLR384C	IKI3	protein_coding	chrXII	888851	892900	-1	116.02	88.35	0.000674378	1.3
YLR064W	PER33	protein_coding	chrXII	265456	266277	1	105.85	259.89	2.04486e-10	2.5			YHR007C	ERG11	protein_coding	chrVIII	120091	121683	-1	768.06	606.84	1.65642e-06	1.3
YLR099W-A	MIM2	protein_coding	chrXII	341325	341588	1	50.71	128.13	0.00961105	2.5			YHR027C	RPN1	protein_coding	chrVIII	161730	164711	-1	168.79	128.95	0.000500105	1.3
YLR204W	QRI5	protein_coding	chrXII	552270	552605	1	51.79	127.16	0.00446414	2.5			YFL022C	FRS2	protein_coding	chrVI	93499	95010	-1	250.55	197.81	0.00749046	1.3
YLR404W	FLD1	protein_coding	chrXII	928743	929600	1	15.6	39.42	0.00961105	2.5			YER055C	HIS1	protein_coding	chrV	264892	265785	-1	733.71	583.47	0.000632369	1.3
YHR060W	VMA22	protein_coding	chrVIII	220725	221270	1	49.03	123.9	0.000250126	2.5			YBL039C	URA7	protein_coding	chrII	143989	145728	-1	340.04	262.95	0.000299303	1.3
YHR081W	LRP1	protein_coding	chrVIII	267538	268092	1	28.94	73.78	0.00412088	2.5			YBR079C	RPG1	protein_coding	chrII	395383	398277	-1	227.04	169.73	1.91751e-05	1.3
YNL051W	COG5	protein_coding	chrXIV	532659	533870	1	29.82	73.44	3.88037e-05	2.5			YBR218C	PYC2	protein_coding	chrII	658707	662249	-1	218.38	166.32	1.28651e-05	1.3
YML094W	GIM5	protein_coding	chrXIII	82275	82849	1	48.89	123.85	0.000166738	2.5			YNL064C	YDJ1	protein_coding	chrXIV	505868	507097	-1	392.88	311.19	0.00286922	1.3
YOL056W	GPM3	protein_coding	chrXV	223268	224179	1	20.55	50.75	0.00293974	2.5			YML126C	ERG13	protein_coding	chrXIII	19060	20535	-1	559.58	417.33	1.38101e-06	1.3
YGL226W	MTC3	protein_coding	chrVII	73340	73711	1	35.98	90.93	0.00961105	2.5			YMR205C	PFK2	protein_coding	chrXIII	671887	674766	-1	1148.07	861.7	5.55111e-17	1.3
YKR063C	LAS1	protein_coding	chrXI	560789	562297	-1	14.19	34.21	0.00208664	2.4			YOL143C	RIB4	protein_coding	chrXV	54595	55104	-1	456.71	342.09	0.0114498	1.3
YKR066C	CCP1	protein_coding	chrXI	566113	567198	-1	140.52	340.97	1.11022e-16	2.4			YOL121C	RPS19A	protein_coding	chrXV	92026	92850	-1	509.49	399.21	0.00371728	1.3
YIL127C	RRT14	protein_coding	chrIX	117024	117644	-1	60.36	146.21	4.16068e-05	2.4			YGR240C	PFK1	protein_coding	chrVII	970771	973734	-1	846.81	639.07	5.55111e-16	1.3
YIR011C	STS1	protein_coding	chrIX	377287	378246	-1	73.9	176.17	3.44231e-08	2.4			YDR011W	SNQ2	protein_coding	chrIV	465919	470424	1	97.14	76.65	0.00395583	1.3
YDR524C	AGE1	protein_coding	chrIV	1487542	1488990	-1	45.27	108.12	1.04321e-07	2.4			YDR025W	RPS11A	protein_coding	chrIV	491515	492324	1	844.5	632.99	1.53246e-05	1.3
YCR028C-A	RIM1	protein_coding	chrIII	172950	173440	-1	158.13	373.46	1.20882e-08	2.4			YJL076W	NET1	protein_coding	chrX	295245	298814	1	95.62	74.3	0.00698816	1.3
YCR054C	CTR86	protein_coding	chrIII	218376	220067	-1	18.99	45.24	0.000206836	2.4			YJL041W	NSP1	protein_coding	chrX	365784	368373	1	89.93	67.36	0.0114498	1.3
YJR127C	RSF2	protein_coding	chrX	658917	663059	-1	31.99	76.06	5.71765e-14	2.4			YJL014W	CCT3	protein_coding	chrX	407558	409162	1	230.2	171.93	0.00130849	1.3
YER028C	MIG3	protein_coding	chrV	210692	211876	-1	22.59	54.08	0.000652656	2.4			YLR197W	NOP56	protein_coding	chrXII	546097	547611	1	619.4	468.86	9.39919e-07	1.3
YER053C	PIC2	protein_coding	chrV	258737	259639	-1	54.85	134.06	1.85918e-06	2.4			YLR340W	RPP0	protein_coding	chrXII	805887	806825	1	6530.67	5183.46	5.55111e-17	1.3
YER130C	COM2	protein_coding	chrV	421115	422446	-1	71.35	171.08	1.2249e-10	2.4			YHL030W	ECM29	protein_coding	chrVIII	40084	45690	1	73.06	57.79	0.00578511	1.3
YNR036C	MRPS12	protein_coding	chrXIV	694361	694822	-1	188.34	450.85	7.98735e-10	2.4			YEL031W	SPF1	protein_coding	chrV	90258	93905	1	416.12	311.84	1.15324e-10	1.3
YOR298C-A	MBF1	protein_coding	chrXV	877230	877685	-1	648.77	1549.93	5.55111e-17	2.4			YER069W	ARG5,6	protein_coding	chrV	295410	298001	1	125.5	97.53	0.00847923	1.3
YOR344C	TYE7	protein_coding	chrXV	977194	978069	-1	105.44	258.1	6.82969e-11	2.4			YBR078W	ECM33	protein_coding	chrII	393123	394742	1	1306.41	1003.33	2.41451e-12	1.3
YGL025C	PGD1	protein_coding	chrVII	448764	449957	-1	20.18	47.71	0.0014765	2.4			YNL209W	SSB2	protein_coding	chrXIV	252059	253900	1	2760.85	2073.12	5.55111e-17	1.3
YGR104C	SRB5	protein_coding	chrVII	697445	698368	-1	17.38	42.39	0.00679848	2.4			YNL087W	TCB2	protein_coding	chrXIV	462411	465947	1	138.9	105.2	0.000397001	1.3
YKL204W	EAP1	protein_coding	chrXI	53704	55602	1	21.85	52.5	2.00337e-05	2.4			YMR083W	ADH3	protein_coding	chrXIII	434788	435915	1	586.25	449.8	8.46526e-05	1.3
YKL150W	MCR1	protein_coding	chrXI	166544	167452	1	55.96	133.18	3.14448e-06	2.4			YMR266W	RSN1	protein_coding	chrXIII	798518	801379	1	154.82	123.79	0.00603067	1.3
YLR063W	BMT6	protein_coding	chrXII	264157	265254	1	19.51	47.02	0.00208664	2.4			YPL012W	RRP12	protein_coding	chrXVI	529723	533409	1	158.66	118.3	4.78122e-05	1.3
YHR001W	OSH7	protein_coding	chrVIII	106055	107368	1	27.51	65.03	9.86912e-05	2.4			YPR145W	ASN1	protein_coding	chrXVI	822620	824338	1	825.45	658.67	7.201e-07	1.3
YHR072W-A	NOP10	protein_coding	chrVIII	241664	241840	1	431.09	1025.92	1.1383e-08	2.4			YOR108W	LEU9	protein_coding	chrXV	523027	524841	1	180.7	142.23	0.0117945	1.3
YNL113W	RPC19	protein_coding	chrXIV	412771	413199	1	121.69	290.49	2.12076e-06	2.4			YOR133W	EFT1	protein_coding	chrXV	575098	577626	1	832.61	618.06	5.21805e-15	1.3
YML055W	SPC2	protein_coding	chrXIII	164790	165326	1	62.32	149.19	0.000138362	2.4			YAL038W	CDC19	protein_coding	chrI	71786	73288	1	11282.7	8777	5.55111e-17	1.3
YMR019W	STB4	protein_coding	chrXIII	312156	315005	1	15.03	36.23	1.34652e-05	2.4			YGL245W	GUS1	protein_coding	chrVII	39023	41149	1	551.31	436.07	3.01124e-06	1.3
YMR158W	MRPS8	protein_coding	chrXIII	572248	572715	1	31.46	76.08	0.0103884	2.4			YGL148W	ARO2	protein_coding	chrVII	226399	227529	1	403.6	306.94	0.000759848	1.3
YPL175W	SPT14	protein_coding	chrXVI	218630	220088	1	24.77	59.79	6.20598e-05	2.4			YGL016W	KAP122	protein_coding	chrVII	461666	464911	1	93.61	71.85	0.00777098	1.3
YPR065W	ROX1	protein_coding	chrXVI	679693	680799	1	43.53	104.53	4.37999e-06	2.4			YGR155W	CYS4	protein_coding	chrVII	798543	800066	1	585.87	468.43	9.68021e-05	1.3
YPR106W	ISR1	protein_coding	chrXVI	740061	741392	1	51.25	124.3	3.02897e-08	2.4			YGR157W	CHO2	protein_coding	chrVII	802440	805049	1	250.8	186.89	1.64176e-05	1.3
YOR210W	RPB10	protein_coding	chrXV	738320	738532	1	289.1	685.36	3.3712e-07	2.4			YGR214W	RPS0A	protein_coding	chrVII	920575	921788	1	991.3	740.56	6.78468e-09	1.3
YOR222W	ODC2	protein_coding	chrXV	758330	759253	1	49.26	117.53	9.65962e-06	2.4
YKL193C	SDS22	protein_coding	chrXI	78866	79882	-1	25.01	57.77	0.00156686	2.3
YKL192C	ACP1	protein_coding	chrXI	80160	80537	-1	524.12	1200.98	5.55111e-17	2.3
YKL020C	SPT23	protein_coding	chrXI	398832	402080	-1	19.78	45.48	5.9006e-07	2.3
YIL117C	PRM5	protein_coding	chrIX	140613	141569	-1	68.54	156.26	6.21249e-07	2.3
YDR276C	PMP3	protein_coding	chrIV	1013476	1013643	-1	1705.17	3952.63	5.55111e-17	2.3
YJR019C	TES1	protein_coding	chrX	467232	468281	-1	17.85	40.69	0.00771435	2.3
YJR109C	CPA2	protein_coding	chrX	629585	632941	-1	131.19	305.46	5.55111e-17	2.3
YLR370C	ARC18	protein_coding	chrXII	861718	862254	-1	92.23	212.17	1.14925e-05	2.3
YLR387C	REH1	protein_coding	chrXII	896374	897672	-1	49.46	113.75	5.9006e-07	2.3
YEL064C	AVT2	protein_coding	chrV	29797	31239	-1	14.84	34.54	0.00336142	2.3
YNL260C	LTO1	protein_coding	chrXIV	156859	157455	-1	29.15	65.6	0.0117305	2.3
YML099C	ARG81	protein_coding	chrXIII	74398	77040	-1	17.73	40.41	2.52376e-05	2.3
YPL163C	SVS1	protein_coding	chrXVI	241918	242700	-1	119.67	279.66	6.87381e-10	2.3
YOR119C	RIO1	protein_coding	chrXV	548792	550246	-1	25.76	59.95	0.000104689	2.3
YOR205C	GEP3	protein_coding	chrXV	725564	727234	-1	13.62	30.9	0.00355313	2.3
YGR095C	RRP46	protein_coding	chrVII	675671	676342	-1	45.82	105.97	0.00049135	2.3
YGR183C	QCR9	protein_coding	chrVII	859063	859476	-1	38.8	90.3	0.0110947	2.3
YKL142W	MRP8	protein_coding	chrXI	178515	179174	1	50.71	118.68	0.000219874	2.3
YKL012W	PRP40	protein_coding	chrXI	418310	420061	1	16.05	37.6	0.000694766	2.3
YIL006W	YIA6	protein_coding	chrIX	344062	345183	1	20.28	47.6	0.00222584	2.3
YDL092W	SRP14	protein_coding	chrIV	292781	293221	1	148.74	339.1	6.21249e-07	2.3
YDL006W	PTC1	protein_coding	chrIV	439909	440754	1	28.48	65.23	0.0023577	2.3
YDR035W	ARO3	protein_coding	chrIV	521816	522928	1	173.19	399.88	5.55111e-17	2.3
YJL210W	PEX2	protein_coding	chrX	36919	37734	1	27.89	63.27	0.00355313	2.3
YLR141W	RRN5	protein_coding	chrXII	423683	424774	1	15.94	35.87	0.0117305	2.3
YHR006W	STP2	protein_coding	chrVIII	117814	119439	1	20.58	47.08	0.000347155	2.3
YEL038W	UTR4	protein_coding	chrV	80462	81145	1	52.84	122.33	0.000156017	2.3
YEL024W	RIP1	protein_coding	chrV	107260	107907	1	43.38	101.65	0.000694766	2.3
YBR006W	UGA2	protein_coding	chrII	247010	248503	1	17.92	41.71	0.00104271	2.3
YBR165W	UBS1	protein_coding	chrII	568852	569685	1	25.68	59.77	0.00336142	2.3
YNL075W	IMP4	protein_coding	chrXIV	485607	486479	1	70.54	163.14	8.25925e-07	2.3
YML100W	TSL1	protein_coding	chrXIII	70624	73920	1	28.83	66.96	7.26482e-10	2.3
YMR005W	TAF4	protein_coding	chrXIII	276045	277211	1	39	90.01	2.39434e-05	2.3
YMR070W	MOT3	protein_coding	chrXIII	409154	410626	1	15.45	35.05	0.00355313	2.3
YMR075W	RCO1	protein_coding	chrXIII	413982	416036	1	18.24	41.58	0.000164612	2.3
YOL144W	NOP8	protein_coding	chrXV	53098	54552	1	18.4	42.82	0.00104271	2.3
YOR078W	BUD21	protein_coding	chrXV	472725	473369	1	93.39	218.05	7.81443e-07	2.3
YGL232W	TAN1	protein_coding	chrVII	62075	63002	1	33.18	76.74	0.00049135	2.3
YGL010W	MPO1	protein_coding	chrVII	475545	476069	1	35.7	81.38	0.00771435	2.3
YGR046W	TAM41	protein_coding	chrVII	584895	586052	1	25.43	58.42	0.00073547	2.3
YDR390C	UBA2	protein_coding	chrIV	1254937	1256847	-1	27.32	59.62	3.02659e-05	2.2
YJL196C	ELO1	protein_coding	chrX	67850	68782	-1	193.69	435.05	5.55111e-16	2.2
YLL039C	UBI4	protein_coding	chrXII	64062	65207	-1	50.23	111.85	6.39336e-06	2.2
YLL010C	PSR1	protein_coding	chrXII	129330	130613	-1	25.02	55.46	0.000812081	2.2
YLR040C	AFB1	protein_coding	chrXII	228908	229582	-1	57.51	129.23	0.000173011	2.2
YLR110C	CCW12	protein_coding	chrXII	369697	370098	-1	16186.9	35034.2	5.55111e-17	2.2
YHR005C-A	TIM10	protein_coding	chrVIII	115620	115901	-1	289.56	637.62	1.24396e-07	2.2
YHR030C	SLT2	protein_coding	chrVIII	168890	170344	-1	80.96	178.64	1.90076e-10	2.2
YBR256C	RIB5	protein_coding	chrII	727386	728102	-1	91.48	201.12	2.27787e-06	2.2
YMR168C	CEP3	protein_coding	chrXIII	597332	599158	-1	14.65	32.16	0.00259797	2.2
YMR272C	SCS7	protein_coding	chrXIII	809623	810777	-1	88.08	189.59	1.18099e-08	2.2
YOL147C	PEX11	protein_coding	chrXV	47933	48643	-1	120.5	270.42	2.56705e-08	2.2
YOR059C	LPL1	protein_coding	chrXV	438906	440258	-1	18.8	40.79	0.00389636	2.2
YOR070C	GYP1	protein_coding	chrXV	455907	457820	-1	20.28	45.58	0.000173011	2.2
YOR137C	SIA1	protein_coding	chrXV	581813	583681	-1	17.91	39.05	0.000847768	2.2
YGR128C	UTP8	protein_coding	chrVII	747950	750091	-1	65.62	142.95	8.71336e-12	2.2
YGR277C	CAB4	protein_coding	chrVII	1045644	1046561	-1	42.29	91.15	0.000415503	2.2
YKL051W	SFK1	protein_coding	chrXI	341312	342373	1	119.75	258.16	1.64472e-10	2.2
YIR004W	DJP1	protein_coding	chrIX	363221	364519	1	35.04	75.38	0.000138216	2.2
YDL128W	VCX1	protein_coding	chrIV	232652	233887	1	174.37	384.57	5.55111e-17	2.2
YDR100W	TVP15	protein_coding	chrIV	655013	655444	1	117.75	255.5	4.46435e-05	2.2
YDR178W	SDH4	protein_coding	chrIV	817950	818495	1	83.36	182.59	8.99075e-05	2.2
YJL062W-A	COA3	protein_coding	chrX	316723	316980	1	228.29	503.72	6.67897e-06	2.2
YLR375W	STP3	protein_coding	chrXII	871697	872728	1	92.1	198.38	3.42096e-08	2.2
YLR390W-A	CCW14	protein_coding	chrXII	903724	904440	1	660.92	1474.87	5.55111e-17	2.2
YHR181W	SVP26	protein_coding	chrVIII	467228	467914	1	77.94	173.62	1.33136e-05	2.2
YBR251W	MRPS5	protein_coding	chrII	721390	722313	1	28.97	63.58	0.00259797	2.2
YNL124W	NAF1	protein_coding	chrXIV	392892	394370	1	36.2	79.44	2.05183e-05	2.2
YML057W	CMP2	protein_coding	chrXIII	160180	161994	1	18.44	41.2	0.000544424	2.2
YMR194W	RPL36A	protein_coding	chrXIII	651145	651910	1	316.31	711.18	5.55111e-17	2.2
YPR009W	SUT2	protein_coding	chrXVI	576552	577358	1	28.2	61.77	0.00561833	2.2
YOL137W	BSC6	protein_coding	chrXV	65621	67114	1	19.71	44.09	0.00115846	2.2
YGL243W	TAD1	protein_coding	chrVII	43307	44509	1	17.8	38.48	0.00847247	2.2
YGL071W	AFT1	protein_coding	chrVII	372012	374084	1	20.66	45.52	0.000127625	2.2
YGL029W	CGR1	protein_coding	chrVII	440063	440425	1	81.13	181.46	0.00115846	2.2
YGR181W	TIM13	protein_coding	chrVII	858287	858604	1	71.56	156.75	0.00561833	2.2
YIL044C	AGE2	protein_coding	chrIX	272950	273846	-1	62.68	129.01	7.72107e-05	2.1
YIR026C	YVH1	protein_coding	chrIX	404873	405967	-1	40.34	82.92	0.000472287	2.1
YDR236C	FMN1	protein_coding	chrIV	935236	935892	-1	50.94	105.68	0.00200977	2.1
YDR435C	PPM1	protein_coding	chrIV	1332983	1333969	-1	21.7	45.09	0.0132373	2.1
YDR441C	APT2	protein_coding	chrIV	1344517	1345062	-1	107.88	221.72	5.41774e-05	2.1
YCL035C	GRX1	protein_coding	chrIII	60841	61173	-1	180.9	379.58	2.45559e-05	2.1
YCL008C	STP22	protein_coding	chrIII	105696	106853	-1	38.15	79.94	0.000311499	2.1
YCR024C-A	PMP1	protein_coding	chrIII	162945	163067	-1	1229.81	2619.75	7.69751e-12	2.1
YJL139C	YUR1	protein_coding	chrX	151713	152999	-1	24.96	52.56	0.0019483	2.1
YJL125C	GCD14	protein_coding	chrX	185528	186679	-1	26.73	57.18	0.00188185	2.1
YJL004C	SYS1	protein_coding	chrX	431589	432200	-1	48.12	101.81	0.00280587	2.1
YLR105C	SEN2	protein_coding	chrXII	347047	348180	-1	20.07	42.39	0.00879422	2.1
YHR039C-A	VMA10	protein_coding	chrVIII	187173	187679	-1	237.63	488.08	8.05096e-09	2.1
YFL027C	GYP8	protein_coding	chrVI	80419	81912	-1	25.09	53.62	0.000616047	2.1
YEL009C	GCN4	protein_coding	chrV	138918	139763	-1	917.74	1938.1	5.55111e-17	2.1
YER083C	GET2	protein_coding	chrV	326174	327031	-1	159.14	340.29	6.13682e-11	2.1
YBL107C	MIX23	protein_coding	chrII	9961	10551	-1	43.04	90.37	0.00605971	2.1
YBR004C	GPI18	protein_coding	chrII	244366	245667	-1	79.17	162.71	9.28291e-08	2.1
YBR044C	TCM62	protein_coding	chrII	324341	326059	-1	14.8	31.07	0.00605971	2.1
YBR141C	BMT2	protein_coding	chrII	527025	528038	-1	26.4	56.18	0.00404774	2.1
YML101C	CUE4	protein_coding	chrXIII	69735	70088	-1	83.19	170.99	0.00431083	2.1
YML016C	PPZ1	protein_coding	chrXIII	239458	241536	-1	57.31	120.74	2.35311e-09	2.1
YMR145C	NDE1	protein_coding	chrXIII	554793	556475	-1	278.39	576.5	5.55111e-17	2.1
YMR285C	NGL2	protein_coding	chrXIII	840144	841691	-1	17.3	35.65	0.00624771	2.1
YPL095C	EEB1	protein_coding	chrXVI	368071	369441	-1	18.55	38.96	0.00605971	2.1
YPL026C	SKS1	protein_coding	chrXVI	500675	502183	-1	36.37	77.86	3.26452e-05	2.1
YPL004C	LSP1	protein_coding	chrXVI	550632	551657	-1	260.94	558.72	5.55111e-17	2.1
YPR052C	NHP6A	protein_coding	chrXVI	665693	665974	-1	655.08	1388.87	5.9952e-14	2.1
YPR188C	MLC2	protein_coding	chrXVI	911988	912479	-1	70.74	151.97	0.000881605	2.1
YOL094C	RFC4	protein_coding	chrXV	141584	142555	-1	31.68	67.77	0.00188185	2.1
YOL003C	PFA4	protein_coding	chrXV	321858	322994	-1	32.97	68.89	0.000943541	2.1
YOR071C	NRT1	protein_coding	chrXV	459480	461276	-1	17.13	36.66	0.00188185	2.1
YGL213C	SKI8	protein_coding	chrVII	90054	91247	-1	69.51	146.12	6.83015e-07	2.1
YGR005C	TFG2	protein_coding	chrVII	504657	505859	-1	27.82	57.71	0.00200977	2.1
YDL150W	RPC53	protein_coding	chrIV	183343	184611	1	32.7	67.34	0.000676981	2.1
YDL046W	NPC2	protein_coding	chrIV	371240	371761	1	253.88	528.63	6.32981e-10	2.1
YDR492W	IZH1	protein_coding	chrIV	1434924	1435874	1	132.32	271.44	4.04012e-09	2.1
YDR519W	FPR2	protein_coding	chrIV	1480425	1480832	1	108.27	222.53	0.000472287	2.1
YJL149W	DAS1	protein_coding	chrX	137379	139370	1	18.14	38.43	0.00091354	2.1
YHR049W	FSH1	protein_coding	chrVIII	206462	207193	1	159.1	328.33	1.10748e-08	2.1
YHR088W	RPF1	protein_coding	chrVIII	281495	282382	1	60.3	128.31	4.80242e-05	2.1
YHR192W	LNP1	protein_coding	chrVIII	486826	487662	1	33.59	70.19	0.0041858	2.1
YEL020W-A	TIM9	protein_coding	chrV	117211	117474	1	101.41	215.79	0.00404774	2.1
YER030W	CHZ1	protein_coding	chrV	213437	213898	1	98.51	208.08	0.000211248	2.1
YBL041W	PRE7	protein_coding	chrII	141247	141972	1	143.82	301.62	2.86248e-08	2.1
YBL038W	MRPL16	protein_coding	chrII	146187	146885	1	38.3	78.95	0.00624771	2.1
YBR162W-A	YSY6	protein_coding	chrII	565231	565428	1	189.3	395.62	0.000943541	2.1
YNR046W	TRM112	protein_coding	chrXIV	707788	708195	1	232.95	479.98	2.62686e-07	2.1
YMR195W	ICY1	protein_coding	chrXIII	654034	654417	1	122.01	254.99	0.000218023	2.1
YMR314W	PRE5	protein_coding	chrXIII	901709	902413	1	178.49	378.78	5.43506e-10	2.1
YPL188W	POS5	protein_coding	chrXVI	191406	192650	1	46.23	98.67	2.29971e-05	2.1
YPL180W	TCO89	protein_coding	chrXVI	205248	207647	1	16.18	33.38	0.000971591	2.1
YPL059W	GRX5	protein_coding	chrXVI	444579	445031	1	67.97	141.48	0.00289765	2.1
YPR062W	FCY1	protein_coding	chrXVI	677165	677641	1	75.77	156.75	0.00139632	2.1
YOL149W	DCP1	protein_coding	chrXV	44938	45633	1	61.55	127.89	0.000459258	2.1
YOR305W	RRG7	protein_coding	chrXV	889022	889750	1	36.73	78.15	0.00404774	2.1
YGL191W	COX13	protein_coding	chrVII	144808	145197	1	116.7	241.93	0.000320929	2.1
YGL157W	ARI1	protein_coding	chrVII	209006	210049	1	60.26	124.48	2.60264e-05	2.1
YGL080W	MPC1	protein_coding	chrVII	358636	359028	1	98.78	203.85	0.000971591	2.1
YGR080W	TWF1	protein_coding	chrVII	642010	643008	1	36.18	74.85	0.00139632	2.1
YKL021C	MAK11	protein_coding	chrXI	397344	398750	-1	28.54	58.2	0.000997689	2
YKR068C	BET3	protein_coding	chrXI	570328	570909	-1	103.5	211.06	5.55748e-05	2
YIL105C	SLM1	protein_coding	chrIX	167581	169641	-1	16.24	32.82	0.00305745	2
YDL205C	HEM3	protein_coding	chrIV	92762	93745	-1	63.94	130.26	3.90099e-05	2
YDL153C	SAS10	protein_coding	chrIV	181186	183018	-1	16.07	32.05	0.00656219	2
YDR364C	CDC40	protein_coding	chrIV	1202843	1204210	-1	16.64	33.84	0.0136168	2
YDR459C	PFA5	protein_coding	chrIV	1382319	1383443	-1	22.61	44.31	0.0142139	2
YDR486C	VPS60	protein_coding	chrIV	1427431	1428120	-1	67.9	134.17	0.000740943	2
YCL057C-A	MIC10	protein_coding	chrIII	24032	24325	-1	141.15	278.55	0.00153143	2
YJL164C	TPK1	protein_coding	chrX	109966	111159	-1	19.06	38.77	0.0136168	2
YJL151C	SNA3	protein_coding	chrX	136372	136773	-1	326.33	642.14	2.06611e-08	2
YJR017C	ESS1	protein_coding	chrX	466521	467033	-1	135.69	270.69	2.92639e-05	2
YLR209C	PNP1	protein_coding	chrXII	560797	561732	-1	51.49	104.61	0.00033827	2
YHR091C	MSR1	protein_coding	chrVIII	284839	286770	-1	15.94	32.25	0.00442321	2
YHR092C	HXT4	protein_coding	chrVIII	287081	288811	-1	24.75	50.39	0.000694822	2
YER168C	CCA1	protein_coding	chrV	521029	522669	-1	33.45	66.18	0.00025182	2
YBR014C	GRX7	protein_coding	chrII	266725	267336	-1	39.37	78.54	0.0139411	2
YNL255C	GIS2	protein_coding	chrXIV	167329	167790	-1	701.19	1398.79	5.55111e-17	2
YNL166C	BNI5	protein_coding	chrXIV	322219	323565	-1	25.84	51.54	0.00312584	2
YNR041C	COQ2	protein_coding	chrXIV	700541	701659	-1	41.87	82.73	0.000740943	2
YMR016C	SOK2	protein_coding	chrXIII	303236	305593	-1	24.98	50.58	8.11528e-05	2
YMR021C	MAC1	protein_coding	chrXIII	317165	318418	-1	23.48	46.85	0.00656219	2
YMR256C	COX7	protein_coding	chrXIII	778945	779127	-1	182.87	369.67	0.00305745	2
YMR311C	GLC8	protein_coding	chrXIII	896914	897603	-1	77.6	154.81	0.000247019	2
YPL252C	YAH1	protein_coding	chrXVI	73363	73881	-1	103.17	205.81	0.000247019	2
YPL089C	RLM1	protein_coding	chrXVI	379120	381150	-1	34.27	67.49	4.32537e-05	2
YPR004C	AIM45	protein_coding	chrXVI	564007	565041	-1	93.12	189.21	4.00642e-07	2
YPR025C	CCL1	protein_coding	chrXVI	613377	614558	-1	23.78	46.69	0.00973487	2
YOR145C	PNO1	protein_coding	chrXV	605347	606171	-1	133.05	267.58	1.04358e-07	2
YOR167C	RPS28A	protein_coding	chrXV	648804	649007	-1	3510.64	7112.37	5.55111e-17	2
YGL231C	EMC4	protein_coding	chrVII	63048	63620	-1	135.5	276.52	4.61071e-06	2
YKL009W	MRT4	protein_coding	chrXI	426242	426952	1	182.63	365.57	9.43996e-09	2
YIL056W	VHR1	protein_coding	chrIX	249991	251913	1	34.11	66.66	8.93692e-05	2
YDR351W	SBE2	protein_coding	chrIV	1178666	1181260	1	16.51	32.93	0.00104408	2
YCL055W	KAR4	protein_coding	chrIII	27929	28936	1	55.78	113.03	0.000115805	2
YCR083W	TRX3	protein_coding	chrIII	259578	259961	1	73.21	148.36	0.00641491	2
YCR089W	FIG2	protein_coding	chrIII	267434	272263	1	22.45	43.86	4.762e-07	2
YHR162W	MPC2	protein_coding	chrVIII	423072	423461	1	312.35	629.94	1.8075e-08	2
YBL026W	LSM2	protein_coding	chrII	170623	171038	1	61.14	124.11	0.00933028	2
YBR163W	EXO5	protein_coding	chrII	565723	567480	1	25.89	52.66	0.000484523	2
YBR244W	GPX2	protein_coding	chrII	707528	708016	1	104.03	207.52	0.000353559	2
YNL261W	ORC5	protein_coding	chrXIV	155100	156539	1	42.76	86.54	5.69123e-05	2
YMR002W	MIX17	protein_coding	chrXIII	272193	272663	1	267.16	544.29	5.98997e-09	2
YMR100W	MUB1	protein_coding	chrXIII	466300	468162	1	40.24	81.23	9.747e-06	2
YPL076W	GPI2	protein_coding	chrXVI	410443	411285	1	34.93	69.69	0.00656219	2
YPR143W	RRP15	protein_coding	chrXVI	818323	819075	1	76.44	153.68	0.00011844	2
YOL151W	GRE2	protein_coding	chrXV	43694	44722	1	59.84	121.11	5.69123e-05	2
YOL011W	PLB3	protein_coding	chrXV	305349	307409	1	77.29	158.07	4.52011e-11	2
YOR265W	RBL2	protein_coding	chrXV	820454	820774	1	112.6	227.39	0.00211794	2
YGR143W	SKN1	protein_coding	chrVII	775193	777508	1	35.26	72.26	2.23413e-06	2
YDR034C	LYS14	protein_coding	chrIV	509737	512109	-1	38.92	73.52	1.18612e-05	1.9
YDR153C	ENT5	protein_coding	chrIV	766736	767971	-1	31.41	59.05	0.0048583	1.9
YDR319C	YFT2	protein_coding	chrIV	1105003	1105827	-1	34.07	64.74	0.0146201	1.9
YCL031C	RRP7	protein_coding	chrIII	64675	65568	-1	85.35	165.28	3.18182e-05	1.9
YJL121C	RPE1	protein_coding	chrX	190374	191090	-1	455.55	849.17	8.88178e-16	1.9
YLR002C	NOC3	protein_coding	chrXII	154343	156334	-1	41.66	78.65	3.36718e-05	1.9
YLR395C	COX8	protein_coding	chrXII	909729	909965	-1	152.5	285.44	0.00703389	1.9
YHR018C	ARG4	protein_coding	chrVIII	140011	141402	-1	50.97	97.2	9.42392e-05	1.9
YBR068C	BAP2	protein_coding	chrII	373861	375690	-1	264.8	509.76	5.55111e-17	1.9
YBR122C	MRPL36	protein_coding	chrII	483970	484503	-1	57.66	110.02	0.0100231	1.9
YBR130C	SHE3	protein_coding	chrII	495592	496869	-1	34.57	64.08	0.00341464	1.9
YBR254C	TRS20	protein_coding	chrII	723736	724263	-1	58.31	107.9	0.0148641	1.9
YNL149C	PGA2	protein_coding	chrXIV	349367	349756	-1	188.78	360.62	6.61424e-05	1.9
YNL110C	NOP15	protein_coding	chrXIV	417826	418488	-1	133.26	255.09	1.15012e-05	1.9
YNL104C	LEU4	protein_coding	chrXIV	424895	426754	-1	302.27	580.03	5.55111e-17	1.9
YNL081C	SWS2	protein_coding	chrXIV	476188	476619	-1	61.97	119.51	0.014439	1.9
YML114C	TAF8	protein_coding	chrXIII	42043	43575	-1	27.07	52.26	0.0022782	1.9
YPL154C	PEP4	protein_coding	chrXVI	259714	260931	-1	394.56	743.97	5.55111e-17	1.9
YOL101C	IZH4	protein_coding	chrXV	126982	127920	-1	75.56	142.19	0.000136952	1.9
YOL006C	TOP1	protein_coding	chrXV	313078	315387	-1	27.82	53.18	0.000189641	1.9
YOR182C	RPS30B	protein_coding	chrXV	678191	678793	-1	1205.44	2267.41	5.55111e-17	1.9
YGL223C	COG1	protein_coding	chrVII	79112	80365	-1	33.09	63.89	0.0022782	1.9
YGL095C	VPS45	protein_coding	chrVII	328874	330607	-1	30.11	58.52	0.000533856	1.9
YGR216C	GPI1	protein_coding	chrVII	922633	924462	-1	46.08	85.61	4.89376e-05	1.9
YGR235C	MIC26	protein_coding	chrVII	961360	962061	-1	47.67	91.3	0.00689417	1.9
YKL207W	EMC3	protein_coding	chrXI	48194	48955	1	144.05	271.01	2.12891e-06	1.9
YKL154W	SRP102	protein_coding	chrXI	161601	162335	1	60.1	111.42	0.00341464	1.9
YKL045W	PRI2	protein_coding	chrXI	353493	355079	1	19.4	35.9	0.0148641	1.9
YDL147W	RPN5	protein_coding	chrIV	190924	192261	1	153.07	288.73	7.71775e-11	1.9
YDR055W	PST1	protein_coding	chrIV	563527	564861	1	163.44	305.38	4.0865e-11	1.9
YDR083W	RRP8	protein_coding	chrIV	612073	613251	1	59.04	110.23	0.000196738	1.9
YJL166W	QCR8	protein_coding	chrX	106434	106718	1	192.58	362.3	0.0008016	1.9
YJR014W	TMA22	protein_coding	chrX	461829	462425	1	125.57	232.6	0.000139863	1.9
YLL028W	TPO1	protein_coding	chrXII	84804	86564	1	42.57	79.86	9.69307e-05	1.9
YLR104W	LCL2	protein_coding	chrXII	346585	346980	1	77.75	148.36	0.0100231	1.9
YLR332W	MID2	protein_coding	chrXII	790676	791806	1	146.76	281.76	1.50773e-09	1.9
YLR386W	VAC14	protein_coding	chrXII	893628	896270	1	16.71	31.66	0.0023326	1.9
YHR143W	DSE2	protein_coding	chrVIII	385510	386487	1	914.33	1740.23	5.55111e-17	1.9
YFR001W	LOC1	protein_coding	chrVI	149110	149724	1	100.13	193.95	0.000184871	1.9
YEL066W	HPA3	protein_coding	chrV	26667	27206	1	49.58	95.61	0.014439	1.9
YER095W	RAD51	protein_coding	chrV	349980	351182	1	38.95	72.51	0.00237163	1.9
YER141W	COX15	protein_coding	chrV	453459	454919	1	62.3	115.76	2.44303e-05	1.9
YBL002W	HTB2	protein_coding	chrII	236492	236887	1	1484	2769.32	5.55111e-17	1.9
YBR149W	ARA1	protein_coding	chrII	539987	541021	1	143.56	270.05	3.50354e-08	1.9
YNL288W	CAF40	protein_coding	chrXIV	90303	91424	1	128.85	249.11	1.13207e-08	1.9
YNL232W	CSL4	protein_coding	chrXIV	214923	215801	1	53.3	99.24	0.00237163	1.9
YNL157W	IGO1	protein_coding	chrXIV	340352	340858	1	95.05	179.08	0.00163643	1.9
YNL065W	AQR1	protein_coding	chrXIV	503724	505484	1	84.38	157.71	5.0175e-08	1.9
YNL053W	MSG5	protein_coding	chrXIV	529942	531411	1	26.41	49.65	0.0048583	1.9
YNL032W	SIW14	protein_coding	chrXIV	574506	575351	1	39.56	73.65	0.0102098	1.9
YNL026W	SAM50	protein_coding	chrXIV	581920	583374	1	30.36	56.28	0.00341464	1.9
YNL004W	HRB1	protein_coding	chrXIV	622915	624621	1	29.8	57.36	0.000776301	1.9
YNR038W	DBP6	protein_coding	chrXIV	695595	697484	1	75.08	142.23	4.81569e-08	1.9
YNR044W	AGA1	protein_coding	chrXIV	703699	705876	1	99.57	186.36	4.05781e-11	1.9
YPL271W	ATP15	protein_coding	chrXVI	30079	30267	1	389.55	753.56	4.52987e-05	1.9
YOL113W	SKM1	protein_coding	chrXV	104326	106293	1	19.05	37.09	0.00324083	1.9
YOR057W	SGT1	protein_coding	chrXV	432186	433373	1	23.66	44.96	0.0146201	1.9
YOR235W	IRC13	protein_coding	chrXV	779870	780184	1	174.24	327.8	0.0008016	1.9
YOR253W	NAT5	protein_coding	chrXV	804377	804907	1	88.23	164.28	0.00237163	1.9
YOR264W	DSE3	protein_coding	chrXV	818866	820158	1	47.62	89.5	0.000394763	1.9
YGL209W	MIG2	protein_coding	chrVII	95858	97006	1	57.09	110.01	0.000131232	1.9
YGR003W	CUL3	protein_coding	chrVII	500132	502366	1	17.37	32.66	0.0048583	1.9
YGR275W	RTT102	protein_coding	chrVII	1043276	1043749	1	73.43	142.72	0.00468889	1.9
YKL186C	MTR2	protein_coding	chrXI	92744	93298	-1	77.18	137.93	0.00715355	1.8
YKL025C	PAN3	protein_coding	chrXI	390240	392279	-1	32.15	56.72	0.00117497	1.8
YKR006C	MRPL13	protein_coding	chrXI	450423	451217	-1	48.83	89.57	0.00711747	1.8
YIL023C	YKE4	protein_coding	chrIX	309386	310426	-1	43.72	76.96	0.00712778	1.8
YDL081C	RPP1A	protein_coding	chrIV	309802	310122	-1	3211.06	5867.7	5.55111e-17	1.8
YDL072C	YET3	protein_coding	chrIV	329836	330447	-1	247.17	456.7	7.24589e-08	1.8
YDR098C	GRX3	protein_coding	chrIV	644178	645035	-1	93.61	170.14	0.000142066	1.8
YDR151C	CTH1	protein_coding	chrIV	764178	765155	-1	42.43	78.27	0.00492497	1.8
YLR073C	RFU1	protein_coding	chrXII	281019	281621	-1	144.3	256.86	0.000142445	1.8
YLR287C-A	RPS30A	protein_coding	chrXII	712537	713158	-1	798.45	1416.78	5.55111e-17	1.8
YLR325C	RPL38	protein_coding	chrXII	781143	781379	-1	3027.47	5310.78	5.55111e-17	1.8
YHR065C	RRP3	protein_coding	chrVIII	227532	229037	-1	62.22	114.67	2.46934e-05	1.8
YFL034C-A	RPL22B	protein_coding	chrVI	64243	64932	-1	145.5	265.75	1.76342e-05	1.8
YBR034C	HMT1	protein_coding	chrII	304930	305976	-1	231.42	418.29	6.21121e-11	1.8
YBR109C	CMD1	protein_coding	chrII	457919	458362	-1	340.69	613.47	2.9135e-07	1.8
YBR111C	YSA1	protein_coding	chrII	461178	461873	-1	90.4	166.26	0.000574808	1.8
YNL251C	NRD1	protein_coding	chrXIV	172588	174315	-1	87.54	157.63	2.9135e-07	1.8
YMR062C	ARG7	protein_coding	chrXIII	395054	396379	-1	55.52	100.69	0.000286468	1.8
YPL206C	PGC1	protein_coding	chrXVI	162632	163597	-1	36.03	64.5	0.0149818	1.8
YPL098C	MGR2	protein_coding	chrXVI	364386	364727	-1	117.42	213.42	0.00714053	1.8
YPR045C	THP3	protein_coding	chrXVI	655140	656552	-1	26.53	46.62	0.014927	1.8
YPR176C	BET2	protein_coding	chrXVI	891101	892078	-1	42.43	74.63	0.0102971	1.8
YOL111C	MDY2	protein_coding	chrXV	108258	108896	-1	60.75	111.44	0.00711747	1.8
YOL077C	BRX1	protein_coding	chrXV	185848	186723	-1	223.11	408.49	1.77305e-09	1.8
YOR164C	GET4	protein_coding	chrXV	643394	644332	-1	116.9	216.14	4.37951e-06	1.8
YOR307C	SLY41	protein_coding	chrXV	892731	894092	-1	31.45	56.21	0.00715355	1.8
YGL221C	NIF3	protein_coding	chrVII	81426	82292	-1	95.73	168.38	0.000285147	1.8
YGL107C	RMD9	protein_coding	chrVII	304333	306273	-1	21.38	39.44	0.00492497	1.8
YKL109W	HAP4	protein_coding	chrXI	232227	233891	1	73.16	130.45	6.32322e-06	1.8
YIR037W	HYR1	protein_coding	chrIX	423128	423619	1	144.2	253.29	0.000821309	1.8
YDR299W	BFR2	protein_coding	chrIV	1059627	1061231	1	37.53	67.66	0.00117911	1.8
YDR352W	YPQ2	protein_coding	chrIV	1181801	1182754	1	67.35	121.3	0.000826759	1.8
YDR427W	RPN9	protein_coding	chrIV	1322205	1323386	1	173.28	313.28	1.80289e-09	1.8
YCL040W	GLK1	protein_coding	chrIII	50838	52340	1	137.16	246.37	2.53496e-09	1.8
YJL159W	HSP150	protein_coding	chrX	120449	121690	1	1900.18	3371.34	5.55111e-17	1.8
YJL104W	PAM16	protein_coding	chrX	227327	227776	1	107.09	193.85	0.00345308	1.8
YJR063W	RPA12	protein_coding	chrX	555195	555572	1	177.07	324.97	0.000404466	1.8
YLL027W	ISA1	protein_coding	chrXII	87403	88155	1	67.55	122.94	0.00240447	1.8
YLR107W	REX3	protein_coding	chrXII	364116	365330	1	29.75	54.21	0.0103094	1.8
YLR143W	DPH6	protein_coding	chrXII	427329	429386	1	17.56	31.14	0.0149661	1.8
YLR388W	RPS29A	protein_coding	chrXII	898651	898821	1	845.46	1499.18	1.1365e-06	1.8
YHR066W	SSF1	protein_coding	chrVIII	229335	230696	1	66.83	120.25	7.10202e-05	1.8
YHR196W	UTP9	protein_coding	chrVIII	491931	493658	1	98.38	181.32	1.33324e-08	1.8
YFR022W	ROG3	protein_coding	chrVI	196833	199034	1	26.75	49.32	0.000817743	1.8
YER048W-A	ISD11	protein_coding	chrV	250718	251002	1	173.79	318.58	0.00239672	1.8
YBL068W	PRS4	protein_coding	chrII	92414	93394	1	62.77	110.7	0.00167858	1.8
YNL158W	PGA1	protein_coding	chrXIV	339612	340208	1	62.78	110.34	0.014927	1.8
YNL126W	SPC98	protein_coding	chrXIV	387227	389767	1	17.91	31.53	0.00712778	1.8
YNR006W	VPS27	protein_coding	chrXIV	636986	638854	1	19.34	35.24	0.0103094	1.8
YML007W	YAP1	protein_coding	chrXIII	253848	255800	1	47.98	88.42	2.46934e-05	1.8
YPL254W	HFI1	protein_coding	chrXVI	69485	70951	1	28.29	50.97	0.00715228	1.8
YPL193W	RSA1	protein_coding	chrXVI	181403	182548	1	29.2	52.82	0.0149718	1.8
YPR043W	RPL43A	protein_coding	chrXVI	654166	654847	1	1515.29	2693.91	5.55111e-17	1.8
YPR121W	THI22	protein_coding	chrXVI	778583	780301	1	21.03	37.28	0.0149661	1.8
YOL142W	RRP40	protein_coding	chrXV	55558	56280	1	94.43	167.44	0.000825462	1.8
YOL092W	YPQ1	protein_coding	chrXV	144204	145130	1	202.17	359.13	2.69587e-08	1.8
YOL039W	RPP2A	protein_coding	chrXV	254297	254617	1	3306.98	5945.34	5.55111e-17	1.8
YOL010W	RCL1	protein_coding	chrXV	307938	309041	1	71.54	132.23	9.88455e-05	1.8
YOR317W	FAA1	protein_coding	chrXV	909343	911445	1	49.65	89.73	1.77512e-05	1.8
YKL174C	TPO5	protein_coding	chrXI	120380	122236	-1	34.6	58.48	0.00327811	1.7
YKL032C	IXR1	protein_coding	chrXI	380065	381858	-1	45.52	78.4	0.000563091	1.7
YKR071C	DRE2	protein_coding	chrXI	574934	575980	-1	93.33	163.23	9.92273e-05	1.7
YIL034C	CAP2	protein_coding	chrIX	289226	290089	-1	140.99	243.14	2.40833e-05	1.7
YDL174C	DLD1	protein_coding	chrIV	145826	147589	-1	37.18	62.57	0.00324763	1.7
YDL015C	TSC13	protein_coding	chrIV	426002	426934	-1	352.95	612.51	2.01084e-12	1.7
YDR006C	SOK1	protein_coding	chrIV	458542	461247	-1	39.58	67.11	0.000132096	1.7
YDR054C	CDC34	protein_coding	chrIV	561440	562327	-1	88.94	154.37	0.000569469	1.7
YDR411C	DFM1	protein_coding	chrIV	1293369	1294394	-1	62.63	107.58	0.00234514	1.7
YCR009C	RVS161	protein_coding	chrIII	130745	131542	-1	117.42	205.24	0.000140616	1.7
YLR003C	CMS1	protein_coding	chrXII	156855	157730	-1	55.01	95.52	0.00706907	1.7
YLR023C	IZH3	protein_coding	chrXII	185498	187129	-1	28.71	50.18	0.0071022	1.7
YLR212C	TUB4	protein_coding	chrXII	564860	566281	-1	44.24	76.37	0.00236004	1.7
YLR309C	IMH1	protein_coding	chrXII	749034	751769	-1	21.04	35.14	0.00667443	1.7
YLR414C	PUN1	protein_coding	chrXII	953353	954144	-1	118.31	200.06	0.000378857	1.7
YHR115C	DMA1	protein_coding	chrVIII	340109	341359	-1	36.38	61.19	0.0143163	1.7
YFR033C	QCR6	protein_coding	chrVI	224326	224769	-1	111.55	188.45	0.00990496	1.7
YBL014C	RRN6	protein_coding	chrII	199064	201748	-1	27.42	47.74	0.000814851	1.7
YBR009C	HHF1	protein_coding	chrII	255373	255684	-1	1102.66	1843.04	3.06954e-11	1.7
YBR082C	UBC4	protein_coding	chrII	406628	407169	-1	264.27	443.43	1.54221e-05	1.7
YBR089C-A	NHP6B	protein_coding	chrII	426190	426489	-1	169.56	296.71	0.0049314	1.7
YBR154C	RPB5	protein_coding	chrII	548362	549009	-1	150.8	258.25	0.000192889	1.7
YNL041C	COG6	protein_coding	chrXIV	549468	551987	-1	25.5	43.8	0.00234514	1.7
YMR067C	UBX4	protein_coding	chrXIII	404323	405573	-1	39.59	65.46	0.0138425	1.7
YMR239C	RNT1	protein_coding	chrXIII	748262	749677	-1	34.03	57.83	0.00999341	1.7
YPL259C	APM1	protein_coding	chrXVI	51244	52671	-1	29.06	49.87	0.0146913	1.7
YPL250C	ICY2	protein_coding	chrXVI	74309	74719	-1	120.51	199.25	0.0138425	1.7
YPL169C	MEX67	protein_coding	chrXVI	229039	230838	-1	42.39	74.18	0.000574561	1.7
YOL005C	RPB11	protein_coding	chrXV	315813	316175	-1	151.2	250.12	0.00948665	1.7
YOR281C	PLP2	protein_coding	chrXV	846269	847129	-1	62.19	107.52	0.0048834	1.7
YGR078C	PAC10	protein_coding	chrVII	639772	640371	-1	122.71	210.67	0.00114199	1.7
YGR255C	COQ6	protein_coding	chrVII	1002523	1003962	-1	42.76	72.94	0.00333366	1.7
YGR295C	COS6	protein_coding	chrVII	1081584	1082729	-1	193.9	324.67	8.34048e-08	1.7
YIL121W	QDR2	protein_coding	chrIX	132244	133872	1	50.13	84.15	0.00108632	1.7
YDL178W	DLD2	protein_coding	chrIV	139522	141114	1	48.74	80.46	0.00213057	1.7
YDR152W	GIR2	protein_coding	chrIV	765706	766503	1	105.68	178.47	0.000770946	1.7
YDR174W	HMO1	protein_coding	chrIV	812110	812850	1	231.24	384.4	3.60386e-06	1.7
YDR189W	SLY1	protein_coding	chrIV	838392	840392	1	46.83	77.4	0.000716656	1.7
YDR205W	MSC2	protein_coding	chrIV	859346	861520	1	39.39	67.94	0.000396084	1.7
YDR221W	GTB1	protein_coding	chrIV	907330	909438	1	33.01	57.4	0.00116194	1.7
YDR247W	VHS1	protein_coding	chrIV	956013	957398	1	41.53	69.36	0.00667443	1.7
YJL122W	ALB1	protein_coding	chrX	189716	190243	1	180.01	310.2	0.000195416	1.7
YLR066W	SPC3	protein_coding	chrXII	267169	267723	1	118.19	202.09	0.00232874	1.7
YLR090W	XDJ1	protein_coding	chrXII	320701	322080	1	35.89	60.63	0.00990496	1.7
YLR243W	GPN3	protein_coding	chrXII	624203	625021	1	70.28	121.73	0.00340084	1.7
YFL026W	STE2	protein_coding	chrVI	82580	83875	1	765.38	1306.36	5.55111e-17	1.7
YER009W	NTF2	protein_coding	chrV	172115	172492	1	694.11	1153.88	9.86358e-09	1.7
YNL298W	CLA4	protein_coding	chrXIV	68915	71443	1	23.29	40.12	0.00338085	1.7
YML052W	SUR7	protein_coding	chrXIII	170402	171310	1	251.82	423.04	4.29516e-08	1.7
YPL118W	MRP51	protein_coding	chrXVI	326628	327662	1	37.51	65.36	0.0148669	1.7
YPR149W	NCE102	protein_coding	chrXVI	829918	830439	1	982.18	1671.14	5.55111e-17	1.7
YPR159W	KRE6	protein_coding	chrXVI	857583	859745	1	275.4	476.55	5.55111e-17	1.7
YOR285W	RDL1	protein_coding	chrXV	849635	850054	1	274.1	466.26	6.60562e-05	1.7
YGL162W	SUT1	protein_coding	chrVII	198138	199037	1	49.08	83.08	0.0144541	1.7
YGR100W	MDR1	protein_coding	chrVII	690245	693097	1	18.77	31.2	0.0095995	1.7
YGR186W	TFG1	protein_coding	chrVII	867774	869981	1	30.92	51.6	0.00318206	1.7
YKL013C	ARC19	protein_coding	chrXI	417508	418023	-1	204.95	331.21	0.000636641	1.6
YKL008C	LAC1	protein_coding	chrXI	427295	428551	-1	127.79	208.19	1.80398e-05	1.6
YKR038C	KAE1	protein_coding	chrXI	511999	513159	-1	49.58	81.27	0.00924811	1.6
YDL198C	GGC1	protein_coding	chrIV	103649	104551	-1	102.29	165.61	0.00134885	1.6
YDL125C	HNT1	protein_coding	chrIV	239019	239606	-1	170.74	269.46	0.00165442	1.6
YDR072C	IPT1	protein_coding	chrIV	589761	591344	-1	117.47	186.57	1.3667e-05	1.6
YDR081C	PDC2	protein_coding	chrIV	607304	610081	-1	26.98	42.3	0.00750427	1.6
YDR298C	ATP5	protein_coding	chrIV	1058176	1058814	-1	291.19	459.7	1.81579e-05	1.6
YDR350C	ATP22	protein_coding	chrIV	1176120	1178174	-1	33.87	55.44	0.00433306	1.6
YDR496C	PUF6	protein_coding	chrIV	1441433	1443403	-1	135.83	211.36	6.968e-07	1.6
YDR500C	RPL37B	protein_coding	chrIV	1450198	1450853	-1	985.61	1536.03	9.76996e-15	1.6
YCL044C	MGR1	protein_coding	chrIII	47111	48364	-1	48.04	76.66	0.0123129	1.6
YCL009C	ILV6	protein_coding	chrIII	104619	105548	-1	960.08	1500.79	5.55111e-17	1.6
YCR044C	PER1	protein_coding	chrIII	206877	207950	-1	83.51	135.92	0.00138721	1.6
YJL094C	KHA1	protein_coding	chrX	251821	254442	-1	38.29	61.79	0.000912645	1.6
YLL051C	FRE6	protein_coding	chrXII	37333	39471	-1	56.32	90.72	0.000297762	1.6
YLR286C	CTS1	protein_coding	chrXII	708448	710136	-1	1649.32	2688.86	5.55111e-17	1.6
YHR141C	RPL42B	protein_coding	chrVIII	381990	382751	-1	1343.91	2123.71	5.55111e-17	1.6
YFL024C	EPL1	protein_coding	chrVI	87847	90345	-1	21.43	34.91	0.0133012	1.6
YFL002C	SPB4	protein_coding	chrVI	145114	146934	-1	31.61	50.84	0.0127169	1.6
YFR005C	SAD1	protein_coding	chrVI	154527	155873	-1	39.75	64.76	0.0133012	1.6
YFR032C-A	RPL29	protein_coding	chrVI	223258	223437	-1	1874.09	2907.78	3.19226e-08	1.6
YFR047C	BNA6	protein_coding	chrVI	244279	245166	-1	79.9	130.31	0.00427503	1.6
YFR050C	PRE4	protein_coding	chrVI	249066	249866	-1	223.94	348.94	4.58225e-05	1.6
YEL060C	PRB1	protein_coding	chrV	40046	41953	-1	47.71	75.58	0.00250077	1.6
YER126C	NSA2	protein_coding	chrV	413394	414179	-1	143.06	235.56	0.000238301	1.6
YBR067C	TIP1	protein_coding	chrII	372103	372735	-1	1057.38	1721.21	5.55111e-17	1.6
YNL231C	PDR16	protein_coding	chrXIV	215987	217042	-1	65.92	106.21	0.00592721	1.6
YNR053C	NOG2	protein_coding	chrXIV	721120	723112	-1	227.02	358.2	2.46986e-11	1.6
YML115C	VAN1	protein_coding	chrXIII	40187	41794	-1	83.25	136.18	7.79574e-05	1.6
YPL212C	PUS1	protein_coding	chrXVI	151515	153149	-1	55.67	89.29	0.00185454	1.6
YPL183C	RTT10	protein_coding	chrXVI	199495	202536	-1	62.49	103	1.67535e-06	1.6
YPL117C	IDI1	protein_coding	chrXVI	327864	328730	-1	104.99	166.32	0.00250077	1.6
YPL049C	DIG1	protein_coding	chrXVI	462481	463839	-1	53.19	83.84	0.00777894	1.6
YOR103C	OST2	protein_coding	chrXV	516449	516841	-1	170.31	276.33	0.00610557	1.6
YOR251C	TUM1	protein_coding	chrXV	802550	803464	-1	77.54	126.47	0.00427503	1.6
YOR311C	DGK1	protein_coding	chrXV	899056	899928	-1	93.54	146.83	0.00510072	1.6
YGL203C	KEX1	protein_coding	chrVII	112475	114664	-1	34.84	55.28	0.00546916	1.6
YGL056C	SDS23	protein_coding	chrVII	396035	397618	-1	45.64	74.18	0.00421602	1.6
YGL038C	OCH1	protein_coding	chrVII	425362	426804	-1	71.43	114.74	0.000885875	1.6
YGL028C	SCW11	protein_coding	chrVII	441281	442909	-1	331.99	516.92	1.61105e-12	1.6
YGL011C	SCL1	protein_coding	chrVII	474489	475247	-1	199.3	328.38	1.96933e-05	1.6
YGR189C	CRH1	protein_coding	chrVII	876669	878192	-1	313.58	495.3	6.06226e-12	1.6
YKL160W	ELF1	protein_coding	chrXI	153269	153706	1	207.83	337.36	0.0013681	1.6
YKL096W-A	CWP2	protein_coding	chrXI	259253	259531	1	6611.62	10866.7	5.55111e-17	1.6
YKL034W	TUL1	protein_coding	chrXI	371829	374105	1	27.04	44.57	0.00644451	1.6
YKL019W	RAM2	protein_coding	chrXI	402568	403518	1	59.12	95.47	0.0129152	1.6
YDL236W	PHO13	protein_coding	chrIV	32296	33234	1	96.94	153.57	0.00250077	1.6
YDL201W	TRM8	protein_coding	chrIV	99561	100421	1	79.29	126.13	0.00819177	1.6
YDR382W	RPP2B	protein_coding	chrIV	1239492	1239824	1	4317.41	6848.44	5.55111e-17	1.6
YCL001W	RER1	protein_coding	chrIII	111916	112482	1	231.37	379.92	7.99431e-05	1.6
YJR013W	GPI14	protein_coding	chrX	460382	461593	1	44.18	71.97	0.0133012	1.6
YLL035W	GRC3	protein_coding	chrXII	68580	70478	1	30.31	49.69	0.00924811	1.6
YLR185W	RPL37A	protein_coding	chrXII	522663	523288	1	994.36	1555.61	1.74305e-14	1.6
YLR350W	ORM2	protein_coding	chrXII	828730	829380	1	197.4	306.28	0.00064127	1.6
YHR137W	ARO9	protein_coding	chrVIII	375709	377250	1	144.98	232.06	1.19729e-06	1.6
YHR175W	CTR2	protein_coding	chrVIII	452872	453441	1	112.73	181.15	0.00860006	1.6
YHR205W	SCH9	protein_coding	chrVIII	509363	511837	1	54.09	87.04	0.000141938	1.6
YHR206W	SKN7	protein_coding	chrVIII	512732	514600	1	64.46	102.87	0.000400361	1.6
YFR052W	RPN12	protein_coding	chrVI	252505	253329	1	168.75	265.42	0.000238101	1.6
YEL065W	SIT1	protein_coding	chrV	27657	29543	1	40.44	64.15	0.00546916	1.6
YER004W	FMP52	protein_coding	chrV	159580	160275	1	188.49	306.94	0.000108277	1.6
YER127W	LCP5	protein_coding	chrV	414481	415554	1	58.58	96.14	0.00636264	1.6
YER131W	RPS26B	protein_coding	chrV	423952	424311	1	2019.11	3278.67	5.55111e-17	1.6
YBR110W	ALG1	protein_coding	chrII	458872	460221	1	46.6	73.85	0.0119024	1.6
YBR142W	MAK5	protein_coding	chrII	528317	530638	1	54.77	87.4	0.000275997	1.6
YBR212W	NGR1	protein_coding	chrII	647886	649904	1	52.38	82	0.00154257	1.6
YBR246W	RRT2	protein_coding	chrII	711591	712754	1	64.4	104	0.00409565	1.6
YMR277W	FCP1	protein_coding	chrXIII	820256	822454	1	39.57	63.96	0.00194001	1.6
YPL075W	GCR1	protein_coding	chrXVI	412254	415362	1	45.21	73.3	7.29353e-05	1.6
YPR113W	PIS1	protein_coding	chrXVI	752257	752919	1	373.53	614.91	5.01986e-08	1.6
YPR198W	SGE1	protein_coding	chrXVI	934034	935665	1	42.65	66.54	0.0108708	1.6
YOR247W	SRL1	protein_coding	chrXV	797676	798308	1	757.08	1229.04	2.03504e-13	1.6
YAL051W	OAF1	protein_coding	chrI	48564	51707	1	21.29	33.97	0.00832871	1.6
YGL160W	AIM14	protein_coding	chrVII	200561	202273	1	39.07	63.4	0.00610557	1.6
YGR097W	ASK10	protein_coding	chrVII	678695	682135	1	35.4	56.91	0.000293393	1.6
YGR198W	YPP1	protein_coding	chrVII	894693	897146	1	51.28	80.53	0.000500784	1.6
YKL016C	ATP7	protein_coding	chrXI	407465	407989	-1	178.49	267.89	0.00749384	1.5
YIL138C	TPM2	protein_coding	chrIX	89230	89715	-1	151.49	230.78	0.013686	1.5
YIL051C	MMF1	protein_coding	chrIX	257843	258280	-1	1555.63	2296.47	5.57909e-12	1.5
YDR017C	KCS1	protein_coding	chrIV	479115	482267	-1	35.66	53.08	0.00420249	1.5
YDR086C	SSS1	protein_coding	chrIV	616928	617170	-1	374.6	549.47	0.0133866	1.5
YDR190C	RVB1	protein_coding	chrIV	840604	841995	-1	68.28	104.87	0.00421802	1.5
YDR233C	RTN1	protein_coding	chrIV	929470	930357	-1	1222.56	1824.38	5.55111e-17	1.5
YDR465C	RMT2	protein_coding	chrIV	1393336	1394574	-1	73.47	107.76	0.0133866	1.5
YCR031C	RPS14A	protein_coding	chrIII	177500	178220	-1	2616.01	3985.25	5.55111e-17	1.5
YJL136C	RPS21B	protein_coding	chrX	156550	157273	-1	451.14	659	3.66111e-06	1.5
YJL091C	GWT1	protein_coding	chrX	261080	262552	-1	50.89	77.35	0.0133983	1.5
YJR041C	URB2	protein_coding	chrX	510239	513763	-1	55.82	83.33	0.000134333	1.5
YLL023C	POM33	protein_coding	chrXII	97997	98836	-1	103.59	152.59	0.0143768	1.5
YLR120C	YPS1	protein_coding	chrXII	386511	388220	-1	183.18	272.77	1.71088e-06	1.5
YLR310C	CDC25	protein_coding	chrXII	752224	756993	-1	33.4	48.89	0.00113726	1.5
YHL029C	OCA5	protein_coding	chrVIII	45929	47968	-1	56.43	83.78	0.00401815	1.5
YHR021C	RPS27B	protein_coding	chrVIII	147871	148669	-1	921.47	1426	4.44089e-16	1.5
YHR056C	RSC30	protein_coding	chrVIII	215183	217834	-1	29.28	44.98	0.00966525	1.5
YHR077C	NMD2	protein_coding	chrVIII	252374	255756	-1	29.28	42.63	0.0115858	1.5
YFL010C	WWM1	protein_coding	chrVI	115108	115743	-1	250.47	377.89	0.000407122	1.5
YER056C-A	RPL34A	protein_coding	chrV	269423	270185	-1	461.42	688.31	3.43719e-07	1.5
YER124C	DSE1	protein_coding	chrV	407342	409063	-1	178.8	260.53	8.07738e-06	1.5
YNL079C	TPM1	protein_coding	chrXIV	478566	479165	-1	348.05	510.35	0.000182179	1.5
YNL002C	RLP7	protein_coding	chrXIV	626174	627142	-1	196.17	288.44	0.000319566	1.5
YNR013C	PHO91	protein_coding	chrXIV	649028	651712	-1	82.76	125.98	1.91499e-05	1.5
YMR037C	MSN2	protein_coding	chrXIII	344403	346517	-1	39.24	58.92	0.0117558	1.5
YPL146C	NOP53	protein_coding	chrXVI	276162	277529	-1	74.37	114.52	0.00288379	1.5
YOR052C	TMC1	protein_coding	chrXV	426772	427224	-1	168.44	259.38	0.00986188	1.5
YOR171C	LCB4	protein_coding	chrXV	652010	653884	-1	46.41	68.36	0.0143768	1.5
YAR002C-A	ERP1	protein_coding	chrI	154065	154724	-1	361.03	558.36	4.01313e-06	1.5
YGL122C	NAB2	protein_coding	chrVII	278946	280523	-1	59.38	90.25	0.00569401	1.5
YGL049C	TIF4632	protein_coding	chrVII	406860	409604	-1	31.7	47.99	0.00835298	1.5
YGL037C	PNC1	protein_coding	chrVII	427297	427947	-1	226.19	330.9	0.00179706	1.5
YKL112W	ABF1	protein_coding	chrXI	226570	228765	1	37.79	56.75	0.0117558	1.5
YKL015W	PUT3	protein_coding	chrXI	408544	411483	1	32.33	48.44	0.00733035	1.5
YKR028W	SAP190	protein_coding	chrXI	494257	497358	1	54.37	82.07	0.000270627	1.5
YDL212W	SHR3	protein_coding	chrIV	78426	79058	1	325.67	492.18	5.34767e-05	1.5
YDR074W	TPS2	protein_coding	chrIV	593893	596583	1	37.81	54.91	0.0110363	1.5
YDR145W	TAF12	protein_coding	chrIV	746738	748357	1	46.27	71.43	0.0100604	1.5
YDR159W	SAC3	protein_coding	chrIV	771877	775782	1	21.25	32.36	0.00890069	1.5
YDR211W	GCD6	protein_coding	chrIV	884727	886865	1	89.49	131.5	0.000312476	1.5
YDR420W	HKR1	protein_coding	chrIV	1306267	1311675	1	24.75	37.52	0.00102695	1.5
YJL001W	PRE3	protein_coding	chrX	435163	435926	1	183.98	267.97	0.00259294	1.5
YJR068W	RFC2	protein_coding	chrX	567643	568704	1	65.55	100.58	0.0145703	1.5
YLL011W	SOF1	protein_coding	chrXII	127523	128992	1	75.58	112.63	0.00429731	1.5
YEL027W	VMA3	protein_coding	chrV	100769	101251	1	1593.62	2336.84	6.67244e-13	1.5
YEL026W	SNU13	protein_coding	chrV	101943	102323	1	1134.86	1710.19	6.37918e-09	1.5
YBR267W	REI1	protein_coding	chrII	739841	741022	1	89.47	137.06	0.00271767	1.5
YNL052W	COX5A	protein_coding	chrXIV	531725	532186	1	159.36	246.62	0.0102608	1.5
YNL044W	YIP3	protein_coding	chrXIV	545268	545877	1	160.2	236.4	0.00914851	1.5
YMR200W	ROT1	protein_coding	chrXIII	664752	665522	1	114.59	168.56	0.0140399	1.5
YPL235W	RVB2	protein_coding	chrXVI	103232	104647	1	82.25	123.21	0.00301756	1.5
YPL221W	FLC1	protein_coding	chrXVI	133043	135424	1	94.41	141.26	4.00312e-05	1.5
YPL143W	RPL33A	protein_coding	chrXVI	282122	282970	1	641.73	958.29	2.02076e-10	1.5
YPL081W	RPS9A	protein_coding	chrXVI	404950	406044	1	156.48	235.74	0.000259647	1.5
YPR072W	NOT5	protein_coding	chrXVI	690107	691789	1	57.27	84.62	0.00936366	1.5
YPR165W	RHO1	protein_coding	chrXVI	875368	875997	1	469.59	706.46	1.74078e-06	1.5
YOL038W	PRE6	protein_coding	chrXV	255337	256101	1	176.74	262.97	0.00170652	1.5
YOR359W	VTS1	protein_coding	chrXV	1011189	1012760	1	69.83	105.32	0.00336074	1.5
YGL220W	FRA2	protein_coding	chrVII	82374	82736	1	239.7	362.92	0.00835298	1.5
YGL198W	YIP4	protein_coding	chrVII	123591	124298	1	124.79	188.59	0.00817567	1.5
YGL178W	MPT5	protein_coding	chrVII	167352	170571	1	58.2	87.91	0.00012004	1.5
YKL056C	TMA19	protein_coding	chrXI	334412	334915	-1	5006.61	7205.87	5.55111e-17	1.4
YKR088C	TVP38	protein_coding	chrXI	604405	605418	-1	108.25	154.5	0.0122089	1.4
YDL224C	WHI4	protein_coding	chrIV	54397	56346	-1	66.59	95.86	0.0051518	1.4
YDL063C	SYO1	protein_coding	chrIV	338272	340134	-1	95.57	132.83	0.00332791	1.4
YDR224C	HTB1	protein_coding	chrIV	914317	914712	-1	621.99	894.63	0.00012169	1.4
YDR304C	CPR5	protein_coding	chrIV	1071880	1072557	-1	284.31	393.87	0.00251347	1.4
YCL037C	SRO9	protein_coding	chrIII	57374	58678	-1	249.26	349.23	4.6596e-05	1.4
YJL190C	RPS22A	protein_coding	chrX	74910	75302	-1	5535.08	7990.85	5.55111e-17	1.4
YLR043C	TRX1	protein_coding	chrXII	231702	232013	-1	1051.17	1443.62	0.000128901	1.4
YLR229C	CDC42	protein_coding	chrXII	604212	604787	-1	274.23	392.53	0.00242415	1.4
YLR244C	MAP1	protein_coding	chrXII	625168	626331	-1	248.41	347.18	0.000139425	1.4
YHR133C	NSG1	protein_coding	chrVIII	370722	371597	-1	157.4	217.45	0.011321	1.4
YEL047C	FRD1	protein_coding	chrV	65385	66797	-1	174.32	248.21	0.000193666	1.4
YEL046C	GLY1	protein_coding	chrV	67629	68792	-1	623.32	865.67	3.40261e-09	1.4
YEL001C	IRC22	protein_coding	chrV	150301	150978	-1	321.83	449.01	0.00100085	1.4
YER052C	HOM3	protein_coding	chrV	256375	257958	-1	206.2	293.34	1.86908e-05	1.4
YER089C	PTC2	protein_coding	chrV	335946	337340	-1	151.62	216.95	0.000454816	1.4
YBL045C	COR1	protein_coding	chrII	134143	135516	-1	97.43	136.05	0.00975297	1.4
YBR080C	SEC18	protein_coding	chrII	398614	400890	-1	65.26	90.69	0.00733225	1.4
YNL322C	KRE1	protein_coding	chrXIV	33294	34235	-1	227.37	319.39	0.000862738	1.4
YNL197C	WHI3	protein_coding	chrXIV	267608	269593	-1	90.32	128.19	0.00163881	1.4
YNL069C	RPL16B	protein_coding	chrXIV	493956	495001	-1	2541.62	3507.79	5.55111e-17	1.4
YML004C	GLO1	protein_coding	chrXIII	261705	262685	-1	161.02	232.29	0.00190515	1.4
YMR015C	ERG5	protein_coding	chrXIII	300869	302485	-1	177.99	247.72	0.000177621	1.4
YPL094C	SEC62	protein_coding	chrXVI	369839	370663	-1	228.79	315.05	0.00337705	1.4
YPL053C	KTR6	protein_coding	chrXVI	457118	458458	-1	92.84	134.08	0.0056784	1.4
YPR016C	TIF6	protein_coding	chrXVI	592332	593069	-1	680.2	931.15	2.79975e-06	1.4
YOR360C	PDE2	protein_coding	chrXV	1013241	1014821	-1	142.25	202.69	0.000357919	1.4
YAL021C	CCR4	protein_coding	chrI	110846	113359	-1	65.49	93.48	0.00214584	1.4
YGL189C	RPS26A	protein_coding	chrVII	148229	148588	-1	8061.57	11537.2	5.55111e-17	1.4
YGL009C	LEU1	protein_coding	chrVII	476313	478652	-1	129.86	187.92	1.38931e-05	1.4
YGR106C	VOA1	protein_coding	chrVII	698989	699786	-1	664.29	903.52	2.49481e-06	1.4
YGR253C	PUP2	protein_coding	chrVII	998358	999140	-1	246.19	338.78	0.00312598	1.4
YGR279C	SCW4	protein_coding	chrVII	1048798	1049958	-1	1172.61	1686.74	5.55111e-17	1.4
YKL180W	RPL17A	protein_coding	chrXI	109269	110129	1	1697.78	2396.44	5.55111e-17	1.4
YIL148W	RPL40A	protein_coding	chrIX	68708	69528	1	1584.84	2222.63	3.33067e-16	1.4
YDL075W	RPL31A	protein_coding	chrIV	322226	322988	1	405.28	562.31	0.000119641	1.4
YDL070W	BDF2	protein_coding	chrIV	331024	332940	1	94.27	128.16	0.00606088	1.4
YDR297W	SUR2	protein_coding	chrIV	1056551	1057600	1	168.29	233.98	0.00341397	1.4
YDR471W	RPL27B	protein_coding	chrIV	1401770	1402564	1	607.86	837.51	2.6211e-06	1.4
YJL177W	RPL17B	protein_coding	chrX	90786	91657	1	755.29	1077.96	8.32854e-10	1.4
YJR117W	STE24	protein_coding	chrX	642007	643368	1	235.88	338.54	1.29981e-05	1.4
YLR129W	DIP2	protein_coding	chrXII	399657	402488	1	65.23	91.15	0.00234369	1.4
YLR413W	INA1	protein_coding	chrXII	951156	953183	1	776.91	1078	5.55111e-17	1.4
YHR026W	VMA16	protein_coding	chrVIII	160844	161485	1	258.55	366.04	0.00264797	1.4
YHR208W	BAT1	protein_coding	chrVIII	517532	518713	1	221.97	313.28	0.000182012	1.4
YFR009W	GCN20	protein_coding	chrVI	162488	164746	1	119.11	171.01	6.46918e-05	1.4
YER021W	RPN3	protein_coding	chrV	196948	198519	1	210.33	285.39	0.000226766	1.4
YER120W	SCS2	protein_coding	chrV	401135	401869	1	466.25	656.4	2.1941e-05	1.4
YER178W	PDA1	protein_coding	chrV	546817	548079	1	994.17	1367.27	5.18474e-14	1.4
YBR286W	APE3	protein_coding	chrII	774700	776313	1	1262.33	1827.7	5.55111e-17	1.4
YNL141W	AAH1	protein_coding	chrXIV	359596	360639	1	161.56	218.27	0.00949173	1.4
YNL131W	TOM22	protein_coding	chrXIV	378767	379225	1	317.89	457.67	0.00301557	1.4
YNL112W	DBP2	protein_coding	chrXIV	413639	416281	1	142.32	196.01	3.47888e-05	1.4
YML078W	CPR3	protein_coding	chrXIII	111002	111550	1	204.82	295.09	0.0090717	1.4
YMR079W	SEC14	protein_coding	chrXIII	424989	426059	1	396.22	566.83	6.94864e-07	1.4
YMR230W	RPS10B	protein_coding	chrXIII	732414	733141	1	364.08	503.76	0.000416994	1.4
YPR036W	VMA13	protein_coding	chrXVI	643836	645272	1	283.19	390.25	1.60302e-05	1.4
YPR169W	JIP5	protein_coding	chrXVI	878690	880168	1	86.89	123.98	0.00673649	1.4
YOL109W	ZEO1	protein_coding	chrXV	110297	110638	1	2552.02	3466.85	1.78876e-09	1.4
YOL030W	GAS5	protein_coding	chrXV	268187	269641	1	360.65	497.99	8.14878e-07	1.4
YOR002W	ALG6	protein_coding	chrXV	329417	331051	1	140.82	199.26	0.000408734	1.4
YGL228W	SHE10	protein_coding	chrVII	67598	69331	1	101.9	144.76	0.00172132	1.4
YGR136W	LSB1	protein_coding	chrVII	762428	763153	1	175.17	250.12	0.00690649	1.4
YDL061C	RPS29B	protein_coding	chrIV	340628	340798	-1	2184.09	2831.78	0.000968531	1.3
YDL039C	PRM7	protein_coding	chrIV	381985	384081	-1	137.25	175.74	0.00598189	1.3
YDR293C	SSD1	protein_coding	chrIV	1045640	1049392	-1	78.11	99.62	0.00640664	1.3
YDR345C	HXT3	protein_coding	chrIV	1162957	1164660	-1	734.52	954.91	1.01665e-09	1.3
YLR029C	RPL15A	protein_coding	chrXII	201976	202590	-1	4686.32	5974.78	5.55111e-17	1.3
YHL011C	PRS3	protein_coding	chrVIII	80654	81616	-1	225.19	303.18	0.00367568	1.3
YHR193C	EGD2	protein_coding	chrVIII	487712	488236	-1	1213.7	1607.33	2.80022e-06	1.3
YBR084C-A	RPL19A	protein_coding	chrII	414186	415261	-1	1083.6	1356.72	5.613e-07	1.3
YNL283C	WSC2	protein_coding	chrXIV	105184	106695	-1	127.49	167.2	0.0130866	1.3
YNL135C	FPR1	protein_coding	chrXIV	371882	372226	-1	1501.6	1986.68	2.56774e-05	1.3
YMR242C	RPL20A	protein_coding	chrXIII	753225	754220	-1	1830.55	2459.5	1.11022e-16	1.3
YMR305C	SCW10	protein_coding	chrXIII	879063	880232	-1	820.34	1083.38	1.27699e-08	1.3
YOR122C	PFY1	protein_coding	chrXV	552298	552887	-1	587.64	769.44	0.000942127	1.3
YOR243C	PUS7	protein_coding	chrXV	790211	792241	-1	82.39	110.45	0.0120018	1.3
YGR027C	RPS25A	protein_coding	chrVII	534132	534458	-1	1645.66	2101.49	0.000202969	1.3
YGR282C	BGL2	protein_coding	chrVII	1057783	1058724	-1	1098.48	1389.07	8.05387e-07	1.3
YKL175W	ZRT3	protein_coding	chrXI	118793	120304	1	161.13	216.65	0.00218421	1.3
YKR042W	UTH1	protein_coding	chrXI	519527	520624	1	1100.9	1473.83	1.83293e-11	1.3
YDL130W	RPP1B	protein_coding	chrIV	229906	230527	1	1194.44	1611.41	6.09642e-08	1.3
YDR023W	SES1	protein_coding	chrIV	489508	490896	1	405.74	540.88	6.29463e-06	1.3
YDR064W	RPS13	protein_coding	chrIV	579458	580452	1	1615.78	2166.75	6.43929e-15	1.3
YDR432W	NPL3	protein_coding	chrIV	1328783	1330027	1	311.81	403.24	0.000872549	1.3
YJL191W	RPS14B	protein_coding	chrX	73787	74611	1	459.19	602.06	0.000510392	1.3
YJR007W	SUI2	protein_coding	chrX	451020	451934	1	433.05	562.29	0.000628351	1.3
YJR094W-A	RPL43B	protein_coding	chrX	608305	608858	1	1145.33	1468.57	4.02929e-05	1.3
YLR109W	AHP1	protein_coding	chrXII	368781	369311	1	2826.01	3808.65	1.73195e-14	1.3
YLR264W	RPS28B	protein_coding	chrXII	673131	673334	1	1246.77	1631.92	0.0046731	1.3
YLR300W	EXG1	protein_coding	chrXII	728955	730301	1	696.65	935.73	2.07707e-09	1.3
YLR344W	RPL26A	protein_coding	chrXII	819312	820142	1	592.8	754.1	0.00047276	1.3
YHR128W	FUR1	protein_coding	chrVIII	362115	362765	1	524.35	667.26	0.00356259	1.3
YEL033W	MTC7	protein_coding	chrV	86179	86598	1	1966.52	2471.19	1.8362e-05	1.3
YEL013W	VAC8	protein_coding	chrV	128825	130561	1	155.67	195.76	0.0139339	1.3
YBR010W	HHT1	protein_coding	chrII	256331	256741	1	866.37	1087.22	0.00518772	1.3
YBR074W	PFF1	protein_coding	chrII	386286	389216	1	78.1	102.04	0.00770633	1.3
YBR191W	RPL21A	protein_coding	chrII	606270	607140	1	1575.32	2001.02	6.76676e-09	1.3
YMR143W	RPS16A	protein_coding	chrXIII	551928	552903	1	888.77	1129.09	3.99597e-06	1.3
YPL262W	FUM1	protein_coding	chrXVI	47336	48802	1	169.73	223.29	0.00429931	1.3
YPL131W	RPL5	protein_coding	chrXVI	303121	304014	1	4619.35	6071.65	5.55111e-17	1.3
YPR028W	YOP1	protein_coding	chrXVI	623527	624202	1	330.7	434.53	0.00709043	1.3
YPR183W	DPM1	protein_coding	chrXVI	900755	901558	1	381.28	498.21	0.00203829	1.3
YOL059W	GPD2	protein_coding	chrXV	217126	218448	1	349.08	453.48	0.00021704	1.3
YOR142W	LSC1	protein_coding	chrXV	593057	594046	1	196.06	257.15	0.01274	1.3
YAL053W	FLC2	protein_coding	chrI	45899	48250	1	132.61	178.63	0.000482759	1.3
YGL103W	RPL28	protein_coding	chrVII	310967	311927	1	869.21	1117.07	1.96631e-06	1.3
YGL012W	ERG4	protein_coding	chrVII	472855	474276	1	339.84	456.96	1.58435e-05	1.3
